# Supplementary material for: Trajectories of childhood immune development and respiratory health relevant to asthma and allergy
Source: eLife journal article supplement (doi:10.7554/elife.35856), 2018-10-15
Supplement: supp [file elife-35856-supp-v1.zip]

Archive with 14 entries (14 files):
- elife_poa_e35856_Figure_3_figure_supplement_1.pdf
- elife_poa_e35856_Figure_5_figure_supplement_1.pdf
- elife_poa_e35856_Supplementary_File_1.docx
- elife_poa_e35856_Supplementary_File_3.xlsx
- elife_poa_e35856_Supplementary_File_2.xlsx
- elife_poa_e35856_Figure_5_figure_supplement_3.pdf
- elife_poa_e35856_Figure_5_figure_supplement_4.pdf
- elife_poa_e35856_Transparent_Reporting_File.docx
- elife_poa_e35856_Figure_4_figure_supplement_1.pdf
- elife_poa_e35856_Figure_1_figure_supplement_2.pdf
- elife_poa_e35856_Figure_1_figure_supplement_3.pdf
- elife_poa_e35856_Figure_5_figure_supplement_2.pdf
- elife_poa_e35856_Figure_4_figure_supplement_2.pdf
- elife_poa_e35856_Figure_1_figure_supplement_1.pdf
