# Supplementary material for: Trajectories of childhood immune development and respiratory health relevant to asthma and allergy
Source: eLife journal article supplement (doi:10.7554/elife.35856), 2018-10-15

Accuracy: 87%

HDM IgG4  
 $\geq 0.034 \mu\text{g/L}$  at age 3?

No

Yes

**Tree cluster 1**

HDM IgE  
 $\geq 44.67 \text{ kU/L}$  at age 3?

No

Yes

**Tree cluster 2**

**Tree cluster 3**

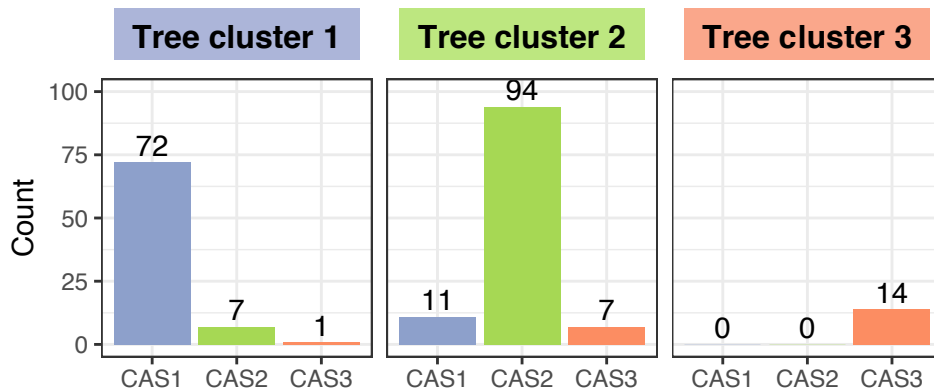

Supplement: supp [file elife-35856-supp-v1.zip › elife_poa_e35856_Figure_5_figure_supplement_2.pdf]
