# Supplementary material for: Trajectories of childhood immune development and respiratory health relevant to asthma and allergy
Source: eLife journal article supplement (doi:10.7554/elife.35856), 2018-10-15
Supplement: supp [file elife-35856-supp-v1.zip › elife_poa_e35856_Supplementary_File_2.xlsx]

## Sheet: demo
variable	mean_95CI_1	mean_95CI_2	mean_95CI_3	p_all	p_1_vs_2	p_1_vs_3	p_2_vs_3	p_all_adj	p_1_vs_2_adj	p_1_vs_3_adj	p_2_vs_3_adj
sex	55% (44%-65%)	51% (42%-61%)	86% (71%-100%)	0.0073	0.67	0.0068	0.0037	0.15	1	0.23	0.14
mat_atopy	74% (65%-83%)	84% (77%-91%)	82% (64%-99%)	0.2	0.11	0.58	0.76	1	1	1	1
mat_had	83% (75%-91%)	81% (74%-89%)	95% (86%-100%)	0.28	0.85	0.19	0.12	1	1	1	1
mat_ast	51% (40%-62%)	41% (32%-51%)	59% (37%-81%)	0.19	0.19	0.63	0.16	1	1	1	1
matfh_xast	72% (62%-81%)	74% (65%-82%)	77% (58%-96%)	0.88	0.75	0.79	1	1	1	1	1
pat_atopy	74% (65%-83%)	85% (78%-92%)	91% (78%-100%)	0.075	0.072	0.15	0.74	1	1	1	1
pat_had	58% (47%-68%)	77% (69%-85%)	59% (37%-81%)	0.01	0.005	1	0.11	0.2	0.18	1	1
pat_ast	22% (13%-30%)	44% (35%-54%)	23% (3.7%-42%)	0.0022	0.0013	1	0.093	0.051	0.055	1	1
patfh_xast	48% (37%-58%)	54% (44%-63%)	41% (19%-63%)	0.49	0.47	0.64	0.35	1	1	1	1
crwz1	33% (23%-43%)	30% (21%-39%)	55% (32%-77%)	0.092	0.76	0.084	0.046	1	1	1	1
crwz2	30% (20%-39%)	29% (20%-38%)	59% (37%-81%)	0.024	1	0.013	0.012	0.42	1	0.4	0.37
crwz3	30% (20%-40%)	23% (15%-31%)	55% (32%-77%)	0.015	0.32	0.044	0.0076	0.28	1	1	0.25
crwz4	23% (14%-32%)	20% (12%-28%)	77% (58%-96%)	9.3e-07	0.59	5.1e-06	5.2e-07	4e-05	1	0.00039	5e-05
crwz5	25% (15%-35%)	21% (13%-30%)	76% (56%-96%)	7.1e-06	0.59	2.6e-05	3.4e-06	0.00026	1	0.0017	0.00028
crwz10	12% (3.4%-21%)	18% (8.4%-27%)	50% (24%-76%)	0.0031	0.46	0.0015	0.011	0.069	1	0.063	0.34
cras_3	12% (4.8%-19%)	3.8% (0.087%-7.5%)	23% (3.7%-42%)	0.0082	0.049	0.3	0.0079	0.17	1	1	0.26
cras_4	11% (4.1%-18%)	8.2% (2.7%-14%)	36% (15%-58%)	0.0042	0.61	0.0083	0.002	0.091	1	0.27	0.08
cras_5	15% (7%-23%)	13% (5.9%-20%)	52% (29%-76%)	0.00041	0.83	0.00077	0.00021	0.011	1	0.034	0.011
cras_10	10% (2.3%-18%)	15% (6.1%-23%)	56% (30%-81%)	0.00026	0.59	0.00018	0.00079	0.0072	1	0.0096	0.035
arc5	30% (20%-40%)	39% (29%-49%)	76% (56%-96%)	0.00064	0.21	0.00027	0.0032	0.017	1	0.014	0.12
crez6m	39% (28%-49%)	45% (35%-54%)	91% (78%-100%)	2.4e-05	0.47	7.9e-06	9e-05	0.00081	1	0.00058	0.0051
crez1	34% (24%-44%)	30% (21%-39%)	82% (64%-99%)	2.5e-05	0.54	7.2e-05	1.4e-05	0.00084	1	0.0042	0.00096
crez2	30% (20%-39%)	31% (22%-40%)	68% (47%-89%)	0.0027	0.88	0.0012	0.0015	0.062	1	0.051	0.063
crez3	27% (18%-37%)	25% (16%-33%)	59% (37%-81%)	0.0071	0.74	0.01	0.004	0.15	1	0.32	0.15
crez4	26% (16%-35%)	28% (19%-37%)	59% (37%-81%)	0.012	0.87	0.0047	0.011	0.23	1	0.17	0.34
crez5	28% (18%-37%)	24% (16%-33%)	71% (50%-92%)	0.00021	0.73	0.00033	7.9e-05	0.0061	1	0.016	0.0046
smoke1	20% (12%-29%)	20% (12%-27%)	0% (0%-0%)	0.041	1	0.021	0.023	0.65	1	0.59	0.64
smoke2	22% (13%-30%)	13% (6.6%-20%)	4.5% (0%-14%)	0.11	0.13	0.071	0.46	1	1	1	1
smoke3	19% (11%-28%)	19% (12%-27%)	4.5% (0%-14%)	0.24	1	0.11	0.12	1	1	1	1
smoke4	16% (7.8%-24%)	11% (4.9%-18%)	4.5% (0%-14%)	0.37	0.39	0.29	0.46	1	1	1	1
smoke5	15% (7%-23%)	16% (8.4%-23%)	4.8% (0%-15%)	0.49	1	0.29	0.3	1	1	1	1
smoke10	12% (3.4%-21%)	12% (3.9%-20%)	5.6% (0%-17%)	0.87	1	0.67	0.68	1	1	1	1
care1	27% (18%-37%)	26% (18%-35%)	36% (15%-58%)	0.6	0.87	0.44	0.43	1	1	1	1
care2	45% (34%-55%)	44% (35%-54%)	41% (19%-63%)	0.96	1	0.81	0.82	1	1	1	1
care3	54% (43%-64%)	52% (43%-62%)	73% (53%-93%)	0.22	0.88	0.15	0.1	1	1	1	1
care4	85% (78%-93%)	86% (78%-93%)	100% (100%-100%)	0.15	1	0.066	0.07	1	1	1	1
crcatexp1	36% (26%-47%)	35% (25%-44%)	23% (3.7%-42%)	0.53	0.88	0.31	0.33	1	1	1	1
crcatexp2	35% (25%-45%)	36% (26%-45%)	23% (3.7%-42%)	0.55	1	0.32	0.32	1	1	1	1
crcatexp3	30% (20%-40%)	27% (18%-35%)	14% (0%-29%)	0.34	0.74	0.18	0.28	1	1	1	1
crcatexp4	28% (18%-38%)	26% (17%-35%)	18% (0.68%-36%)	0.7	0.74	0.42	0.59	1	1	1	1
crcatexp5	30% (20%-40%)	29% (19%-38%)	14% (0%-31%)	0.35	0.87	0.18	0.27	1	1	1	1
crcatexp10	34% (22%-47%)	26% (16%-37%)	28% (4.9%-51%)	0.61	0.34	0.78	1	1	1	1	1
crdogexp10	38% (25%-51%)	32% (21%-44%)	22% (0.95%-43%)	0.48	0.58	0.27	0.57	1	1	1	1
crfurpet10	62% (49%-75%)	78% (68%-88%)	78% (57%-99%)	0.14	0.077	0.27	1	1	1	1	1
ht3	96 (95-97)	97 (96-97)	96 (95-97)	0.54	0.3	0.91	0.49	1	1	1	1
ht4	104 (103-105)	104 (103-105)	103 (101-105)	0.82	0.83	0.64	0.52	1	1	1	1
ht5	111 (110-112)	111 (111-112)	110 (108-112)	0.57	0.7	0.44	0.29	1	1	1	1
ht10	1.4 (1.4-1.4)	1.4 (1.4-1.4)	1.4 (1.4-1.4)	0.26	0.25	0.15	0.41	1	1	1	1
wt3	15 (15-16)	15 (15-16)	15 (14-16)	0.8	0.61	0.78	0.6	1	1	1	1
wt4	17 (17-18)	17 (17-18)	18 (16-19)	0.85	0.67	0.63	0.81	1	1	1	1
wt5	20 (19-21)	20 (19-21)	20 (18-21)	0.77	0.49	1	0.7	1	1	1	1
wt10	37 (35-40)	36 (34-38)	35 (32-39)	0.66	0.4	0.52	1	1	1	1	1
bmi3	16 (16-17)	16 (16-17)	16 (16-17)	0.86	0.65	0.68	0.8	1	1	1	1
bmi4	16 (16-17)	16 (16-16)	17 (16-17)	0.59	0.76	0.32	0.39	1	1	1	1
bmi5	16 (16-16)	16 (16-16)	16 (15-17)	0.71	0.56	0.48	0.67	1	1	1	1
bmi10	18 (17-19)	18 (17-18)	18 (17-19)	0.89	0.75	1	0.62	1	1	1	1
nochdn1	1.8 (1.6-2)	1.5 (1.4-1.7)	1.8 (1.3-2.2)	0.013	0.0035	0.57	0.21	0.25	0.13	1	1
nochdn2	2 (1.8-2.2)	1.6 (1.5-1.8)	2.1 (1.7-2.5)	0.00082	0.00057	0.68	0.014	0.021	0.026	1	0.42
nochdn3	2.2 (2.1-2.4)	2 (1.8-2.1)	2.3 (1.9-2.7)	0.035	0.022	0.81	0.082	0.57	0.62	1	1
nochdn4	2.4 (2.2-2.6)	2.1 (1.9-2.2)	2.5 (2.1-2.9)	0.03	0.02	0.8	0.061	0.5	0.57	1	1
nochdn5	2.4 (2.2-2.6)	2.1 (2-2.3)	2.4 (2-2.8)	0.11	0.04	0.59	0.38	1	1	1	1
nochdn10	2.6 (2.3-2.8)	2.2 (2-2.4)	2.3 (2-2.7)	0.077	0.026	0.35	0.51	1	0.71	1	1
oldchdbirth	0.93 (0.72-1.1)	0.53 (0.38-0.69)	0.77 (0.32-1.2)	0.0045	0.001	0.37	0.25	0.097	0.043	1	1
oldchd1	0.84 (0.65-1)	0.51 (0.36-0.67)	0.77 (0.32-1.2)	0.013	0.0035	0.57	0.21	0.25	0.13	1	1
oldchd2	0.85 (0.66-1)	0.5 (0.34-0.65)	0.77 (0.32-1.2)	0.0028	0.00065	0.48	0.16	0.063	0.029	1	1
oldchd3	0.81 (0.6-1)	0.5 (0.35-0.65)	0.77 (0.32-1.2)	0.032	0.01	0.74	0.19	0.53	0.32	1	1
oldchd4	0.88 (0.66-1.1)	0.49 (0.34-0.65)	0.57 (0.23-0.91)	0.0057	0.0014	0.19	0.49	0.12	0.059	1	1
oldchd5	0.68 (0.5-0.85)	0.39 (0.25-0.54)	0.67 (0.23-1.1)	0.016	0.0051	0.75	0.12	0.29	0.18	1	1
oldchd10	0.76 (0.58-0.95)	0.44 (0.26-0.61)	0.59 (0.22-0.95)	0.028	0.0075	0.34	0.39	0.47	0.25	1	1
vitdmat	76 (69-83)	71 (66-77)	69 (59-80)	0.29	0.31	0.15	0.38	1	1	1	1
vitd3_cd	26 (23-29)	27 (24-30)	26 (21-32)	0.69	0.58	0.71	0.41	1	1	1	1
vitd3_6m	64 (59-69)	64 (59-68)	59 (50-70)	0.66	0.68	0.38	0.51	1	1	1	1
vitd3_1	60 (55-64)	59 (55-63)	59 (52-67)	0.93	0.98	0.76	0.7	1	1	1	1
vitd3_2	57 (54-61)	58 (55-61)	47 (40-55)	0.012	0.82	0.0054	0.0044	0.23	1	0.19	0.16
vitd3_3	53 (49-58)	59 (56-62)	51 (46-57)	0.082	0.14	0.38	0.033	1	1	1	0.86
vitd3_4	59 (56-62)	57 (53-60)	50 (45-56)	0.082	0.51	0.023	0.077	1	1	0.64	1
vitd3_5	89 (83-95)	84 (79-89)	77 (69-84)	0.057	0.46	0.016	0.056	0.86	1	0.47	1
vitd3_10	77 (72-82)	78 (73-83)	65 (56-75)	0.039	0.86	0.024	0.012	0.63	1	0.67	0.37
ds_vitd3_cd	26 (23-29)	27 (25-30)	26 (21-31)	0.46	0.4	0.6	0.26	1	1	1	1
ds_vitd3_6m	65 (60-69)	64 (60-68)	60 (53-68)	0.46	0.61	0.21	0.36	1	1	1	1
ds_vitd3_1	60 (57-64)	60 (56-63)	59 (51-68)	0.91	0.89	0.67	0.71	1	1	1	1
ds_vitd3_2	57 (54-61)	58 (56-61)	48 (40-56)	0.032	0.77	0.011	0.015	0.53	1	0.34	0.45
ds_vitd3_3	52 (48-57)	60 (57-62)	51 (45-58)	0.018	0.052	0.27	0.0098	0.32	1	1	0.31
ds_vitd3_4	59 (56-62)	57 (54-60)	51 (44-59)	0.31	0.52	0.13	0.26	1	1	1	1
ds_vitd3_5	88 (83-94)	85 (81-89)	80 (73-87)	0.27	0.57	0.14	0.16	1	1	1	1
ds_vitd3_10	76 (71-81)	78 (74-83)	69 (60-80)	0.21	0.44	0.23	0.074	1	1	1	1

## Sheet: immuno
variable	mean_95CI_1	mean_95CI_2	mean_95CI_3	p_all	p_1_vs_2	p_1_vs_3	p_2_vs_3	p_all_adj	p_1_vs_2_adj	p_1_vs_3_adj	p_2_vs_3_adj
totige6m	1.2 (0.69-2)	2.2 (1.4-3.6)	21 (12-35)	1.2e-07	0.044	6.7e-08	2.2e-06	5.9e-06	1	8.1e-06	0.00019
totige1	0.6 (0.29-1.3)	2 (1.1-3.7)	43 (17-109)	2e-09	0.019	4.3e-09	5.3e-08	1.3e-07	0.55	6.8e-07	6.6e-06
totige2	6.6 (3.5-12)	17 (12-25)	187 (131-267)	1.2e-11	0.044	4.2e-11	1.4e-10	1.4e-09	1	1.2e-08	3.5e-08
totige3	18 (13-27)	28 (22-35)	267 (177-401)	1.3e-11	0.11	2.8e-11	8.9e-11	1.4e-09	1	8.3e-09	2.5e-08
totige4	20 (13-29)	35 (26-47)	345 (212-563)	2.8e-10	0.064	2e-10	8.5e-09	2.2e-08	1	4.6e-08	1.2e-06
totige5	35 (23-55)	60 (46-80)	451 (278-731)	2.2e-08	0.096	1.9e-08	1.5e-07	1.2e-06	1	2.6e-06	1.7e-05
totige10	85 (46-154)	150 (103-217)	800 (405-1.6E+03)	0.00014	0.11	0.00013	0.00028	0.0042	1	0.0071	0.014
hdmige6m	0.018 (0.016-0.02)	0.019 (0.016-0.022)	0.033 (0.019-0.059)	0.0019	0.47	0.00079	0.0042	0.045	1	0.035	0.15
hdmige1	0.019 (0.017-0.023)	0.019 (0.016-0.022)	0.26 (0.075-0.93)	1.3e-09	0.47	2.5e-07	4.5e-09	9.1e-08	1	2.6e-05	7.1e-07
hdmige2	0.024 (0.019-0.031)	0.042 (0.029-0.06)	7.1 (2.7-19)	2.6e-16	0.078	2.5e-15	3.5e-13	8e-14	1	2.6e-12	2.4e-10
hdmige3	0.043 (0.029-0.064)	0.064 (0.04-0.1)	23 (7.5-68)	1.5e-13	0.49	8.8e-13	2.4e-12	2.2e-11	1	4.9e-10	1e-09
hdmige4	0.057 (0.036-0.09)	0.2 (0.11-0.35)	30 (8.9-103)	3.7e-11	0.0028	2e-10	1.7e-08	3.5e-09	0.11	4.6e-08	2.3e-06
hdmige5	0.072 (0.041-0.13)	0.23 (0.12-0.45)	31 (7.8-127)	4.2e-09	0.015	3.8e-09	5.1e-07	2.6e-07	0.45	6.1e-07	5e-05
hdmige10	0.37 (0.17-0.8)	1.3 (0.51-3.4)	52 (19-144)	2.9e-06	0.068	5.7e-07	9.7e-05	0.00011	1	5.4e-05	0.0055
hdmigg_1	0.21 (0.2-0.23)	0.23 (0.21-0.25)	0.29 (0.21-0.39)	0.042	0.34	0.012	0.07	0.66	1	0.37	1
hdmigg_2	0.32 (0.27-0.37)	0.49 (0.41-0.59)	0.89 (0.57-1.4)	1.9e-06	0.00021	3.8e-06	0.007	7.8e-05	0.011	0.0003	0.24
hdmigg_3	0.24 (0.22-0.26)	0.31 (0.26-0.36)	0.88 (0.51-1.5)	2.5e-07	0.023	8.5e-08	3.7e-05	1.2e-05	0.64	1e-05	0.0023
hdmigg_5	0.55 (0.42-0.7)	0.59 (0.46-0.74)	1.7 (0.88-3.3)	0.0015	0.67	0.00064	0.0009	0.036	1	0.029	0.039
hdmigg_10	1.6 (1.3-1.9)	2.1 (1.8-2.5)	2.8 (1.9-4.2)	0.01	0.023	0.011	0.18	0.2	0.64	0.34	1
hdmg4_6m	1.5E-04 (1.5E-04-1.5E-04)	1.7E-04 (1.3E-04-2.1E-04)	4.6E-04 (9.0E-05-2.4E-03)	0.0049	0.37	0.0052	0.024	0.1	1	0.18	0.67
hdmg4_1	1.5E-04 (1.5E-04-1.5E-04)	6.9E-04 (3.2E-04-1.5E-03)	0.081 (4.6E-03-1.4)	1.8e-10	0.00052	6.6e-12	2.2e-05	1.5e-08	0.024	2.5e-09	0.0014
hdmg4_2	3.4E-04 (1.8E-04-6.6E-04)	4.8 (1.7-13)	61 (8.9-419)	1.8e-25	1.5e-22	8.6e-18	9.8e-05	5e-22	1.4e-18	2e-14	0.0055
hdmg4_3	7.7E-04 (3.1E-04-1.9E-03)	35 (18-71)	198 (46-859)	2.9e-29	8.2e-26	1e-16	1.8e-06	1.6e-25	1.6e-21	1.6e-13	0.00016
hdmg4_4	0.01 (2.6E-03-0.041)	16 (5.5-44)	389 (228-664)	3.1e-18	2e-13	2.2e-12	1.5e-05	1.9e-15	1.5e-10	9.7e-10	0.001
hdmg4_5	2 (0.48-8.1)	168 (111-256)	539 (317-917)	1.1e-15	1.3e-12	1e-08	0.00019	2.8e-13	6.5e-10	1.4e-06	0.01
hdmigg_non_g4_1	0.21 (0.2-0.23)	0.23 (0.21-0.25)	0.28 (0.21-0.39)	0.042	0.34	0.012	0.07	0.66	1	0.37	1
hdmigg_non_g4_2	0.31 (0.26-0.37)	0.46 (0.38-0.54)	0.67 (0.44-1)	5.7e-05	0.00067	8.6e-05	0.05	0.0018	0.03	0.0049	1
hdmigg_non_g4_3	0.24 (0.22-0.26)	0.29 (0.25-0.33)	0.59 (0.35-1)	0.00023	0.061	5.8e-05	0.0035	0.0065	1	0.0035	0.13
hdmigg_non_g4_5	0.52 (0.41-0.66)	0.47 (0.38-0.59)	1.2 (0.62-2.3)	0.0094	0.57	0.0071	0.0033	0.19	1	0.24	0.13
hdmigg_ige_1	4.6E+03 (3.9E+03-5.4E+03)	5.1E+03 (4.3E+03-6.0E+03)	452 (120-1.7E+03)	2.9e-06	0.15	3.7e-05	4.7e-06	0.00011	1	0.0023	0.00037
hdmigg_ige_2	5.4E+03 (4.0E+03-7.2E+03)	5.0E+03 (3.3E+03-7.6E+03)	52 (22-122)	4.9e-11	0.15	1.4e-11	5.4e-10	4.5e-09	1	4.7e-09	1.1e-07
hdmigg_ige_3	2.3E+03 (1.5E+03-3.4E+03)	2.0E+03 (1.3E+03-3.2E+03)	16 (6.5-41)	3.9e-11	0.96	2e-11	2.7e-10	3.7e-09	1	6.2e-09	5.9e-08
hdmigg_ige_5	3.8E+03 (2.2E+03-6.5E+03)	1.2E+03 (608-2.4E+03)	23 (8.4-60)	2.2e-08	0.029	8.8e-09	1.8e-06	1.2e-06	0.77	1.3e-06	0.00016
hdmigg_ige_10	1.7E+03 (830-3.5E+03)	656 (263-1.6E+03)	22 (9.3-54)	3e-05	0.18	3e-06	0.00037	0.00099	1	0.00025	0.018
hdmg4_ige_6m	3.5E-03 (3.1E-03-4.0E-03)	3.6E-03 (2.8E-03-4.8E-03)	5.9E-03 (9.3E-04-0.037)	0.06	0.61	0.026	0.058	0.89	1	0.71	1
hdmg4_ige_1	3.2E-03 (2.8E-03-3.8E-03)	0.015 (6.9E-03-0.033)	0.13 (7.3E-03-2.2)	0.0042	0.0092	0.0036	0.15	0.091	0.3	0.13	1
hdmg4_ige_2	5.8E-03 (3.0E-03-0.011)	53 (18-154)	3.6 (0.56-23)	2.2e-20	2.1e-19	8.8e-09	0.00043	2.4e-17	8e-16	1.3e-06	0.02
hdmg4_ige_3	7.4E-03 (2.8E-03-0.02)	231 (101-528)	3.7 (0.74-18)	1.3e-23	9.4e-22	1.4e-07	1.1e-06	2.4e-20	6e-18	1.6e-05	0.0001
hdmg4_ige_4	0.076 (0.021-0.28)	33 (11-103)	5.3 (1.8-16)	3.4e-09	7.7e-09	0.0016	0.0015	2.2e-07	1.1e-06	0.066	0.063
hdmg4_ige_5	11 (3-44)	307 (148-634)	7.1 (1.9-27)	6.3e-06	0.00031	0.13	1.2e-05	0.00023	0.015	1	0.00083
catige6m	0.018 (0.016-0.021)	0.021 (0.018-0.024)	0.029 (0.018-0.048)	0.029	0.21	0.0073	0.075	0.48	1	0.24	1
catige1	0.017 (0.015-0.019)	0.017 (0.015-0.018)	0.05 (0.026-0.096)	1.7e-08	0.34	6.6e-06	3.9e-08	9.7e-07	1	0.00049	5e-06
catige2	0.018 (0.016-0.021)	0.02 (0.017-0.023)	0.072 (0.034-0.15)	3.2e-09	0.66	4.6e-08	8.3e-08	2.1e-07	1	5.7e-06	1e-05
catige3	0.021 (0.017-0.026)	0.019 (0.016-0.022)	0.09 (0.038-0.21)	2.2e-09	0.6	5.6e-07	6.8e-09	1.5e-07	1	5.3e-05	1e-06
catige4	0.017 (0.015-0.018)	0.023 (0.018-0.029)	0.13 (0.05-0.32)	9.2e-12	0.071	1.3e-11	1.4e-07	1.1e-09	1	4.5e-09	1.6e-05
catige5	0.018 (0.015-0.021)	0.027 (0.02-0.036)	0.21 (0.075-0.61)	2.4e-10	0.022	1e-10	1.2e-06	1.9e-08	0.62	2.7e-08	0.00011
catige10	0.05 (0.029-0.084)	0.056 (0.033-0.095)	1.4 (0.38-5.1)	4.1e-06	0.71	3.8e-06	6.9e-06	0.00015	1	0.0003	0.00051
catigg_1	0.2 (0.2-0.21)	0.23 (0.21-0.25)	0.24 (0.19-0.3)	0.024	0.015	0.0055	0.49	0.42	0.45	0.19	1
catigg_2	0.28 (0.24-0.32)	0.37 (0.31-0.45)	0.35 (0.24-0.51)	0.023	0.006	0.19	0.71	0.4	0.21	1	1
catigg_3	0.22 (0.21-0.24)	0.3 (0.26-0.35)	0.39 (0.26-0.6)	0.0019	0.0086	0.00052	0.14	0.045	0.28	0.024	1
catigg_5	0.48 (0.38-0.62)	0.52 (0.41-0.66)	0.92 (0.54-1.6)	0.06	0.7	0.021	0.037	0.89	1	0.59	0.94
catigg_10	0.72 (0.54-0.95)	0.89 (0.72-1.1)	1.1 (0.63-1.9)	0.3	0.18	0.24	0.72	1	1	1	1
catg4_6m	2.3E-04 (1.4E-04-3.9E-04)	4.8E-04 (2.4E-04-9.8E-04)	1.8E-03 (1.6E-04-0.019)	0.048	0.099	0.012	0.21	0.74	1	0.37	1
catg4_1	7.5E-04 (3.2E-04-1.8E-03)	0.032 (9.5E-03-0.11)	1.1 (0.066-18)	2.2e-08	3.4e-06	1.6e-08	0.017	1.2e-06	0.00028	2.2e-06	0.5
catg4_2	0.055 (0.015-0.21)	68 (36-126)	33 (3.5-317)	1.3e-19	2.6e-19	3.6e-08	0.34	1.2e-16	8.3e-16	4.7e-06	1
catg4_3	0.32 (0.079-1.3)	110 (58-210)	285 (182-445)	7e-19	3.2e-17	1.1e-09	0.082	4.9e-16	6.8e-14	2e-07	1
catg4_4	1.3 (0.31-5.5)	117 (56-245)	199 (44-895)	3e-14	1.9e-12	2.8e-08	0.054	5.9e-12	8.8e-10	3.8e-06	1
catg4_5	32 (10-100)	449 (377-535)	298 (48-1.8E+03)	2.7e-11	5.1e-10	2.1e-06	0.035	2.7e-09	1.1e-07	0.00018	0.9
catigg_non_g4_1	0.2 (0.2-0.21)	0.23 (0.21-0.24)	0.24 (0.19-0.3)	0.025	0.015	0.0055	0.49	0.43	0.45	0.19	1
catigg_non_g4_2	0.27 (0.24-0.32)	0.33 (0.28-0.38)	0.28 (0.21-0.37)	0.14	0.056	0.79	0.37	1	1	1	1
catigg_non_g4_3	0.22 (0.21-0.24)	0.26 (0.23-0.29)	0.33 (0.22-0.48)	0.017	0.12	0.0041	0.078	0.31	1	0.15	1
catigg_non_g4_5	0.43 (0.34-0.54)	0.37 (0.3-0.46)	0.51 (0.29-0.88)	0.54	0.48	0.53	0.33	1	1	1	1
catigg_ige_1	4.9E+03 (4.4E+03-5.5E+03)	5.7E+03 (5.0E+03-6.4E+03)	2.0E+03 (1.0E+03-4.1E+03)	3.1e-05	0.03	0.00084	9.6e-05	0.001	0.79	0.037	0.0055
catigg_ige_2	6.2E+03 (5.0E+03-7.7E+03)	8.0E+03 (6.4E+03-9.9E+03)	2.0E+03 (982-4.1E+03)	3e-06	0.043	2e-05	7.1e-06	0.00012	1	0.0013	0.00052
catigg_ige_3	4.5E+03 (3.6E+03-5.7E+03)	6.6E+03 (5.4E+03-8.1E+03)	1.8E+03 (724-4.6E+03)	0.00028	0.051	0.0036	0.00028	0.0077	1	0.13	0.014
catigg_ige_5	1.1E+04 (8.4E+03-1.4E+04)	8.3E+03 (6.0E+03-1.2E+04)	1.8E+03 (686-4.7E+03)	0.0016	0.5	0.00039	0.0022	0.038	1	0.019	0.087
catigg_ige_10	6.0E+03 (3.6E+03-1.0E+04)	6.6E+03 (3.9E+03-1.1E+04)	326 (110-960)	2.3e-05	0.72	7.1e-06	2.5e-05	0.00078	1	0.00052	0.0016
catg4_ige_6m	5.4E-03 (3.2E-03-9.2E-03)	9.7E-03 (4.7E-03-0.02)	0.025 (1.9E-03-0.33)	0.72	0.94	0.41	0.51	1	1	1	1
catg4_ige_1	0.018 (7.5E-03-0.044)	0.82 (0.24-2.8)	9.1 (0.48-171)	7.8e-06	4.4e-06	0.00044	0.54	0.00028	0.00035	0.021	1
catg4_ige_2	1.3 (0.33-4.8)	1.4E+03 (752-2.7E+03)	191 (20-1.9E+03)	7.7e-18	1.6e-18	0.00052	0.011	4.3e-15	4.4e-15	0.024	0.34
catg4_ige_3	6.5 (1.5-28)	2.4E+03 (1.2E+03-4.8E+03)	1.3E+03 (578-3.0E+03)	4.9e-15	8.1e-16	0.0023	0.018	1.1e-12	9.1e-13	0.091	0.52
catg4_ige_4	33 (8-138)	2.1E+03 (1.0E+03-4.6E+03)	656 (151-2.8E+03)	1.9e-09	8.9e-10	0.44	0.00084	1.3e-07	1.6e-07	1	0.037
catg4_ige_5	732 (235-2.3E+03)	7.0E+03 (5.0E+03-9.8E+03)	580 (104-3.2E+03)	5.7e-07	7e-06	0.055	9.2e-05	2.5e-05	0.00052	1	0.0052
pntige6m	0.024 (0.019-0.03)	0.03 (0.024-0.037)	0.21 (0.079-0.58)	1e-06	0.11	4e-07	1.6e-05	4.3e-05	1	4e-05	0.0011
pntige1	0.021 (0.017-0.025)	0.024 (0.02-0.03)	0.54 (0.19-1.5)	8.9e-12	0.34	8.5e-11	5.6e-10	1.1e-09	1	2.4e-08	1.1e-07
pntige2	0.024 (0.02-0.029)	0.025 (0.021-0.03)	0.58 (0.24-1.4)	4.2e-14	0.56	7.3e-13	1.2e-12	7.8e-12	1	4.2e-10	6.3e-10
pntige3	0.021 (0.017-0.026)	0.018 (0.016-0.021)	0.42 (0.14-1.3)	3.8e-17	0.75	4.7e-12	9.8e-15	1.7e-14	1	1.9e-09	9.8e-12
pntige4	0.019 (0.016-0.022)	0.022 (0.018-0.027)	0.37 (0.11-1.2)	4.4e-13	0.17	6.4e-12	8.9e-10	6.1e-11	1	2.4e-09	1.6e-07
pntige5	0.027 (0.02-0.037)	0.034 (0.024-0.047)	0.73 (0.19-2.8)	6.9e-09	0.3	7.9e-09	2.2e-07	4.2e-07	1	1.2e-06	2.3e-05
pntige10	0.085 (0.052-0.14)	0.072 (0.045-0.11)	0.78 (0.25-2.4)	0.00015	0.58	0.00026	3.9e-05	0.0045	1	0.013	0.0024
pntg4_6m	1.5E-04 (1.5E-04-1.5E-04)	1.5E-04 (1.5E-04-1.5E-04)	8.1E-04 (1.2E-04-5.6E-03)	2.1e-06	NA	0.00057	0.00015	8.5e-05	NA	0.026	0.0082
pntg4_1	2.0E-04 (1.3E-04-2.9E-04)	2.7E-03 (9.5E-04-7.7E-03)	0.53 (0.023-12)	3.3e-10	4.4e-05	3.8e-12	0.00013	2.5e-08	0.0027	1.5e-09	0.0071
pntg4_2	2.9E-03 (8.5E-04-9.6E-03)	4.6 (1.3-16)	20 (1.4-280)	4.9e-12	1.9e-11	5.7e-08	0.33	5.9e-10	6e-09	7e-06	1
pntg4_3	5.3E-03 (1.4E-03-0.021)	27 (8.8-85)	77 (6.1-953)	3.9e-14	1.7e-13	2e-08	0.2	7.5e-12	1.3e-10	2.7e-06	1
pntg4_4	0.012 (2.8E-03-0.051)	11 (2.6-43)	67 (5-907)	1.1e-10	8.5e-10	2.8e-07	0.31	9.8e-09	1.6e-07	2.9e-05	1
pntg4_5	0.45 (0.083-2.5)	91 (31-267)	316 (43-2.3E+03)	1.5e-07	8.4e-07	3.1e-05	0.23	7.3e-06	7.8e-05	0.002	1
pntg4_ige_6m	2.6E-03 (2.1E-03-3.2E-03)	2.1E-03 (1.7E-03-2.6E-03)	1.6E-03 (1.9E-04-0.013)	0.0071	0.11	0.0038	0.021	0.15	1	0.14	0.59
pntg4_ige_1	4.0E-03 (2.5E-03-6.2E-03)	0.046 (0.017-0.13)	0.41 (0.027-6.2)	0.00099	0.0065	0.00022	0.15	0.025	0.22	0.011	1
pntg4_ige_2	0.05 (0.015-0.17)	75 (21-268)	14 (1.2-160)	1e-10	6.7e-11	0.0037	0.0038	9.1e-09	1.9e-08	0.14	0.14
pntg4_ige_3	0.11 (0.028-0.39)	626 (204-1.9E+03)	75 (5.7-991)	4.6e-14	1.3e-14	0.00037	0.0095	8.1e-12	1.2e-11	0.018	0.31
pntg4_ige_4	0.26 (0.061-1.1)	199 (48-818)	76 (7-824)	1.3e-08	5.8e-09	0.003	0.028	7.6e-07	9e-07	0.12	0.75
pntg4_ige_5	7 (1.3-38)	1.1E+03 (389-3.2E+03)	179 (26-1.2E+03)	2.3e-05	1.2e-05	0.28	0.011	0.00078	0.00083	1	0.34
couige6m	0.02 (0.017-0.024)	0.021 (0.017-0.024)	0.024 (0.016-0.035)	0.47	0.88	0.28	0.24	1	1	1	1
couige1	0.019 (0.016-0.022)	0.018 (0.016-0.02)	0.029 (0.017-0.049)	0.049	0.72	0.04	0.019	0.75	1	1	0.55
couige2	0.022 (0.019-0.026)	0.019 (0.017-0.022)	0.087 (0.05-0.15)	7.2e-10	0.096	3.4e-07	2.7e-10	5.4e-08	1	3.4e-05	5.9e-08
couige3	0.019 (0.015-0.023)	0.018 (0.015-0.021)	0.12 (0.047-0.28)	1.1e-12	0.23	5.7e-08	1.8e-11	1.5e-10	1	7e-06	5.8e-09
couige4	0.02 (0.015-0.025)	0.023 (0.017-0.031)	0.32 (0.12-0.89)	5.8e-14	0.54	2.3e-11	2e-10	9.6e-12	1	7.1e-09	4.6e-08
couige5	0.029 (0.02-0.041)	0.046 (0.029-0.072)	1.2 (0.34-4.3)	2.7e-08	0.17	1.5e-08	1.3e-06	1.5e-06	1	2.1e-06	0.00012
couige10	0.19 (0.095-0.38)	0.12 (0.065-0.22)	2.8 (0.86-9.4)	0.00033	0.36	0.00082	7.6e-05	0.0089	1	0.036	0.0045
coug4_6m	1.5E-04 (1.5E-04-1.5E-04)	1.7E-04 (1.3E-04-2.1E-04)	2.8E-04 (7.6E-05-1.0E-03)	0.14	0.37	0.051	0.22	1	1	1	1
coug4_1	1.7E-04 (1.3E-04-2.3E-04)	8.0E-04 (3.6E-04-1.8E-03)	0.01 (6.2E-04-0.18)	2.1e-05	0.0013	8.6e-07	0.015	0.00072	0.055	8e-05	0.45
coug4_2	2.0E-04 (1.3E-04-3.0E-04)	0.02 (5.8E-03-0.067)	0.14 (6.1E-03-3.2)	7.3e-10	2.2e-09	5.3e-10	0.12	5.4e-08	3.8e-07	1.1e-07	1
coug4_3	2.6E-03 (8.2E-04-8.4E-03)	13 (4.4-41)	18 (1.4-241)	3.4e-17	6.6e-17	3.3e-09	0.35	1.7e-14	1.1e-13	5.4e-07	1
coug4_4	0.037 (8.1E-03-0.17)	42 (14-125)	86 (11-698)	6.4e-14	2.7e-13	1.8e-07	0.32	1e-11	1.9e-10	1.9e-05	1
coug4_5	0.26 (0.055-1.3)	125 (59-265)	196 (32-1.2E+03)	9.1e-14	7.2e-13	3e-07	0.24	1.4e-11	4.2e-10	3.1e-05	1
coug4_ige_6m	3.1E-03 (2.6E-03-3.6E-03)	3.4E-03 (2.6E-03-4.5E-03)	4.9E-03 (1.2E-03-0.02)	0.7	0.77	0.51	0.43	1	1	1	1
coug4_ige_1	3.8E-03 (2.8E-03-5.2E-03)	0.018 (8.1E-03-0.042)	0.15 (0.01-2.2)	0.014	0.032	0.0071	0.17	0.26	0.83	0.24	1
coug4_ige_2	3.7E-03 (2.4E-03-5.8E-03)	0.43 (0.12-1.5)	0.66 (0.031-14)	5.7e-07	2.9e-08	0.038	0.39	2.5e-05	3.8e-06	0.97	1
coug4_ige_3	0.058 (0.018-0.19)	316 (104-962)	65 (3.5-1.2E+03)	3.7e-16	5.6e-17	1.1e-05	0.23	1.1e-13	1.1e-13	0.00078	1
coug4_ige_4	0.77 (0.18-3.4)	759 (247-2.3E+03)	111 (11-1.2E+03)	1.7e-11	6e-12	0.014	0.0034	1.8e-09	2.3e-09	0.42	0.13
coug4_ige_5	3.9 (0.74-20)	1.1E+03 (497-2.6E+03)	67 (9.6-472)	1.1e-07	1.2e-07	0.47	0.00057	5.5e-06	1.4e-05	1	0.026
ryeige6m	0.021 (0.018-0.025)	0.022 (0.018-0.026)	0.024 (0.016-0.035)	0.54	0.74	0.3	0.34	1	1	1	1
ryeige1	0.017 (0.015-0.02)	0.017 (0.016-0.019)	0.025 (0.015-0.042)	0.066	0.78	0.033	0.042	0.97	1	0.86	1
ryeige3	0.026 (0.02-0.035)	0.02 (0.017-0.025)	0.28 (0.1-0.78)	2e-10	0.14	2.9e-07	1.2e-10	1.7e-08	1	3e-05	3.1e-08
ryeige4	0.024 (0.018-0.033)	0.03 (0.022-0.042)	0.86 (0.3-2.4)	1.7e-11	0.27	1.1e-10	1.7e-09	1.8e-09	1	3e-08	3e-07
ryeige5	0.039 (0.026-0.059)	0.056 (0.035-0.09)	1.8 (0.49-6.4)	2.5e-07	0.37	1.7e-07	1.4e-06	1.2e-05	1	1.9e-05	0.00012
ryeige10	0.3 (0.14-0.63)	0.23 (0.12-0.45)	4.3 (1.2-15)	0.0011	0.77	0.0012	0.00027	0.027	1	0.051	0.014
ryeg4_6m	1.5E-04 (1.5E-04-1.5E-04)	1.5E-04 (1.5E-04-1.5E-04)	2.6E-04 (8.1E-05-8.6E-04)	0.013	NA	0.051	0.031	0.25	NA	1	0.81
ryeg4_1	1.8E-04 (1.3E-04-2.5E-04)	2.6E-04 (1.6E-04-4.3E-04)	5.9E-03 (3.8E-04-0.09)	8.4e-06	0.17	1.2e-05	0.00039	0.0003	1	0.00083	0.019
ryeg4_2	2.0E-04 (1.3E-04-2.9E-04)	5.9E-03 (1.8E-03-0.019)	0.12 (5.5E-03-2.6)	4e-08	1.6e-06	6.3e-10	0.041	2.2e-06	0.00014	1.2e-07	1
ryeg4_3	1.5E-04 (1.5E-04-1.5E-04)	0.013 (3.7E-03-0.042)	0.2 (9.7E-03-4.3)	2e-10	3.7e-09	1.3e-12	0.056	1.7e-08	6e-07	6.5e-10	1
ryeg4_4	2.7E-04 (1.5E-04-5.0E-04)	7.6E-03 (2.2E-03-0.027)	0.19 (7.8E-03-4.8)	2.7e-07	1.7e-05	2.9e-08	0.023	1.2e-05	0.0011	3.8e-06	0.64
ryeg4_5	3.8E-03 (9.7E-04-0.015)	0.25 (0.056-1.1)	30 (3-303)	1.5e-07	8.5e-05	1.2e-07	0.0051	7.3e-06	0.0049	1.4e-05	0.18
ryeg4_ige_6m	3.0E-03 (2.5E-03-3.6E-03)	2.9E-03 (2.4E-03-3.5E-03)	4.7E-03 (1.3E-03-0.017)	0.79	0.74	0.54	0.59	1	1	1	1
ryeg4_ige_1	4.2E-03 (3.0E-03-6.1E-03)	6.4E-03 (3.9E-03-0.011)	0.097 (7.1E-03-1.3)	0.023	0.5	0.0091	0.027	0.4	1	0.29	0.73
ryeg4_ige_3	2.4E-03 (1.8E-03-3.1E-03)	0.26 (0.075-0.89)	0.3 (0.013-6.9)	2.7e-06	1.7e-07	0.011	0.53	0.00011	1.9e-05	0.34	1
ryeg4_ige_4	4.7E-03 (2.5E-03-8.7E-03)	0.1 (0.03-0.36)	0.095 (3.9E-03-2.3)	0.014	0.0021	0.44	0.32	0.26	0.084	1	1
ryeg4_ige_5	0.041 (0.011-0.15)	1.9 (0.43-8.3)	7.1 (0.83-60)	0.00026	0.00055	0.00051	0.75	0.0072	0.025	0.024	1
grassigg_1	0.24 (0.21-0.28)	0.29 (0.25-0.34)	0.35 (0.24-0.52)	0.029	0.054	0.0095	0.22	0.48	1	0.31	1
grassigg_2	0.37 (0.31-0.46)	0.64 (0.52-0.79)	0.51 (0.34-0.77)	0.0014	0.0003	0.13	0.44	0.034	0.015	1	1
grassigg_3	0.25 (0.23-0.28)	0.38 (0.32-0.47)	0.57 (0.37-0.9)	9.8e-05	0.0023	2.3e-05	0.059	0.0031	0.091	0.0015	1
grassigg_5	0.77 (0.61-0.98)	0.77 (0.6-0.99)	1.8 (1.1-2.9)	0.014	0.88	0.0047	0.0069	0.26	1	0.17	0.23
grassigg_10	1.4 (1.1-1.6)	1.6 (1.3-1.9)	1.5 (1.1-2)	0.34	0.15	0.68	0.49	1	1	1	1
mouige6m	0.018 (0.016-0.02)	0.017 (0.015-0.02)	0.019 (0.013-0.027)	0.66	0.39	0.99	0.58	1	1	1	1
mouige1	0.016 (0.015-0.017)	0.016 (0.015-0.017)	0.015 (0.015-0.015)	0.77	0.82	0.48	0.53	1	1	1	1
mouige2	0.018 (0.016-0.02)	0.018 (0.016-0.021)	0.025 (0.018-0.034)	0.0034	0.94	0.0036	0.0025	0.075	1	0.13	0.098
mouige3	0.022 (0.017-0.028)	0.019 (0.016-0.023)	0.048 (0.026-0.09)	2.3e-06	0.49	0.00013	1.2e-06	9.1e-05	1	0.0071	0.00011
mouige4	0.017 (0.015-0.02)	0.026 (0.018-0.037)	0.042 (0.023-0.078)	1.4e-05	0.1	2.4e-06	0.0016	0.00049	1	0.0002	0.066
mouige5	0.018 (0.015-0.022)	0.029 (0.019-0.044)	0.085 (0.034-0.21)	7.8e-07	0.071	1.6e-07	0.00028	3.4e-05	1	1.8e-05	0.014
mouige10	0.057 (0.033-0.096)	0.087 (0.046-0.16)	1 (0.34-3.2)	0.00012	0.41	2.1e-05	0.00038	0.0037	1	0.0014	0.018
moug4_6m	2.3E-04 (1.4E-04-3.6E-04)	1.8E-04 (1.4E-04-2.5E-04)	2.8E-04 (7.7E-05-1.0E-03)	0.69	0.49	0.8	0.46	1	1	1	1
moug4_1	1.5E-04 (1.5E-04-1.5E-04)	1.5E-04 (1.5E-04-1.5E-04)	2.7E-04 (8.1E-05-8.8E-04)	0.012	NA	0.051	0.029	0.23	NA	1	0.77
moug4_2	1.5E-04 (1.5E-04-1.5E-04)	4.9E-04 (2.4E-04-9.9E-04)	2.4E-04 (8.8E-05-6.8E-04)	0.011	0.0031	0.049	0.41	0.22	0.12	1	1
moug4_3	2.0E-04 (1.3E-04-3.1E-04)	1.1E-03 (4.6E-04-2.8E-03)	2.1E-03 (2.2E-04-0.019)	0.0029	0.0016	0.00086	0.6	0.065	0.066	0.037	1
moug4_4	5.2E-04 (2.3E-04-1.2E-03)	1.8E-03 (6.3E-04-5.1E-03)	0.097 (5.4E-03-1.7)	7.6e-05	0.076	1.2e-05	0.0025	0.0024	1	0.00083	0.098
moug4_5	2.9E-03 (8.2E-04-0.01)	0.3 (0.075-1.2)	3.3 (0.21-51)	9.3e-07	8.4e-06	5.6e-06	0.14	4e-05	0.00061	0.00043	1
moug4_ige_6m	5.2E-03 (3.2E-03-8.5E-03)	4.4E-03 (3.2E-03-6.1E-03)	6.2E-03 (1.6E-03-0.024)	0.93	0.7	0.89	0.93	1	1	1	1
moug4_ige_1	3.9E-03 (3.6E-03-4.3E-03)	4.0E-03 (3.8E-03-4.2E-03)	7.4E-03 (2.2E-03-0.024)	0.15	0.82	0.089	0.076	1	1	1	1
moug4_ige_2	3.5E-03 (3.1E-03-3.9E-03)	0.011 (5.5E-03-0.023)	4.1E-03 (1.3E-03-0.013)	0.0031	0.065	0.018	0.0038	0.069	1	0.52	0.14
moug4_ige_3	3.9E-03 (2.3E-03-6.5E-03)	0.025 (0.01-0.063)	0.018 (1.7E-03-0.19)	0.007	0.0045	0.36	0.03	0.15	0.16	1	0.79
moug4_ige_4	0.013 (5.5E-03-0.03)	0.029 (0.011-0.079)	0.96 (0.046-20)	0.041	0.23	0.017	0.072	0.65	1	0.5	1
moug4_ige_5	0.054 (0.015-0.2)	4.3 (1.1-16)	16 (1.2-205)	1.6e-05	1e-05	0.0007	0.78	0.00056	0.00072	0.031	1
fmxige5	0.039 (0.028-0.054)	0.081 (0.055-0.12)	2.1 (0.66-6.9)	1.9e-09	0.0069	3.3e-09	3.6e-07	1.3e-07	0.23	5.4e-07	3.6e-05
fmxg4_5	758 (213-2.7E+03)	2.2E+04 (1.6E+04-2.8E+04)	1.1E+04 (1.2E+03-1.1E+05)	4.7e-14	2.3e-13	6.8e-07	0.5	8.1e-12	1.7e-10	6.4e-05	1
phinfige6m	0.033 (0.025-0.044)	0.073 (0.053-0.1)	1 (0.36-2.9)	2.3e-10	0.00028	3.5e-10	2.4e-06	1.8e-08	0.014	7.6e-08	0.0002
phinfige1	0.12 (0.092-0.15)	0.23 (0.18-0.3)	5.7 (3.2-10)	1.3e-14	0.00017	2.3e-12	1.8e-11	2.8e-12	0.0092	1e-09	5.8e-09
phinfige2	0.088 (0.069-0.11)	0.29 (0.22-0.37)	15 (9.7-23)	1.6e-19	2.4e-09	4.7e-13	6.3e-13	1.3e-16	4.1e-07	3e-10	3.9e-10
phinfige3	0.094 (0.066-0.13)	0.3 (0.21-0.43)	28 (16-49)	2e-16	5.7e-06	1.1e-12	2.2e-12	6.9e-14	0.00043	6e-10	9.7e-10
phinfige4	0.088 (0.057-0.14)	0.46 (0.29-0.73)	43 (22-82)	4.9e-16	1.8e-07	8.7e-12	1.9e-10	1.3e-13	1.9e-05	3.1e-09	4.5e-08
phadige5	0.085 (0.047-0.15)	0.35 (0.18-0.66)	35 (12-96)	2.1e-10	0.0018	9e-10	1.1e-07	1.7e-08	0.074	1.6e-07	1.3e-05
phige10	1.1 (0.5-2.6)	2.3 (1-5.4)	67 (36-125)	6.9e-06	0.15	2e-06	4.7e-05	0.00025	1	0.00017	0.0029
phinfg4_6m	9.0E-03 (2.1E-03-0.039)	0.71 (0.16-3.2)	0.67 (0.019-23)	0.00054	0.00017	0.014	0.99	0.014	0.0092	0.42	1
phinfg4_1	66 (21-203)	1.3E+03 (706-2.4E+03)	1.4E+03 (240-8.7E+03)	1.7e-09	1.9e-09	8.2e-05	0.58	1.2e-07	3.3e-07	0.0047	1
phinfg4_2	64 (15-273)	1.0E+04 (5.7E+03-1.8E+04)	5.7E+03 (904-3.5E+04)	1.9e-16	1.2e-16	5.1e-06	0.69	6.9e-14	1.8e-13	0.00039	1
phinfg4_3	677 (232-2.0E+03)	2.3E+04 (1.9E+04-2.9E+04)	2.5E+04 (1.4E+04-4.7E+04)	1.8e-20	3.9e-20	4e-08	0.96	2.4e-17	1.9e-16	5e-06	1
phinfg4_4	575 (172-1.9E+03)	2.2E+04 (1.6E+04-2.8E+04)	2.4E+04 (1.3E+04-4.6E+04)	2.4e-16	5.2e-16	4.7e-07	0.81	7.8e-14	6.2e-13	4.6e-05	1
phadg4_5	0.016 (3.0E-03-0.081)	59 (17-206)	643 (92-4.5E+03)	5.9e-14	3.7e-11	5.9e-10	0.0036	9.6e-12	1.1e-08	1.2e-07	0.13
phinfg4_ige_6m	0.27 (0.063-1.2)	9.7 (2.1-44)	0.66 (0.023-19)	0.02	0.031	0.42	0.02	0.36	0.81	1	0.57
phinfg4_ige_1	561 (179-1.8E+03)	5.6E+03 (3.0E+03-1.1E+04)	255 (44-1.5E+03)	4.3e-07	0.00019	0.012	2e-06	2e-05	0.01	0.37	0.00017
phinfg4_ige_2	722 (170-3.1E+03)	3.5E+04 (1.9E+04-6.3E+04)	380 (57-2.5E+03)	1.8e-11	1.5e-06	0.002	2.6e-10	1.8e-09	0.00013	0.08	5.8e-08
phinfg4_ige_3	7.2E+03 (2.5E+03-2.1E+04)	7.6E+04 (5.0E+04-1.2E+05)	898 (347-2.3E+03)	1.7e-11	1.2e-05	1.7e-05	5.4e-10	1.8e-09	0.00083	0.0011	1.1e-07
phinfg4_ige_4	6.5E+03 (2.0E+03-2.1E+04)	4.7E+04 (2.8E+04-7.8E+04)	564 (196-1.6E+03)	5.5e-08	0.016	4.2e-05	9.3e-09	2.9e-06	0.47	0.0026	1.3e-06
phinfg4_ige_5	0.18 (0.036-0.88)	170 (47-612)	19 (1.9-178)	1.8e-07	2e-07	0.0064	0.007	8.6e-06	2.1e-05	0.22	0.24
mhdm13_cd	1.7E-03 (1.1E-04-0.026)	6.0E-03 (4.8E-04-0.075)	6.7E-03 (3.3E-05-1.4)	0.85	0.6	0.68	0.94	1	1	1	1
mhdm13_6m	1.0E-04 (8.8E-06-1.1E-03)	3.2E-04 (3.8E-05-2.6E-03)	2 (0.015-266)	0.00032	0.5	0.00017	0.00038	0.0087	1	0.0092	0.018
mhdm13_1	2.2E-05 (2.9E-06-1.6E-04)	4.9E-05 (5.4E-06-4.4E-04)	5.8E-03 (3.2E-05-1.1)	0.026	0.57	0.0084	0.037	0.45	1	0.27	0.94
mhdm13_2	1.9E-06 (7.7E-07-4.7E-06)	1.7E-06 (8.2E-07-3.3E-06)	2.2E-05 (6.4E-07-7.5E-04)	0.04	0.83	0.054	0.023	0.64	1	1	0.64
mhdm13_3	1.5E-06 (6.7E-07-3.3E-06)	1.4E-06 (7.2E-07-2.7E-06)	1.0E-06 (1.0E-06-1.0E-06)	0.87	0.9	0.62	0.65	1	1	1	1
mhdm13_5	0.036 (1.6E-03-0.8)	0.11 (8.8E-03-1.4)	2.9E+03 (742-1.1E+04)	6.8e-05	0.59	9.9e-05	2.5e-05	0.0022	1	0.0056	0.0016
mhdm4_cd	1.4E-06 (6.9E-07-3.0E-06)	1.9E-06 (7.8E-07-4.4E-06)	1.0E-06 (1.0E-06-1.0E-06)	0.71	0.65	0.6	0.47	1	1	1	1
mhdm4_6m	4.6E-06 (1.0E-06-2.1E-05)	5.1E-06 (1.4E-06-1.8E-05)	0.54 (6.5E-03-44)	6.2e-09	0.94	4.7e-07	1e-07	3.8e-07	1	4.6e-05	1.2e-05
mhdm4_1	4.2E-06 (1.0E-06-1.7E-05)	1.8E-05 (2.8E-06-1.2E-04)	8.9E-04 (8.1E-06-0.099)	0.0093	0.22	0.0029	0.035	0.19	1	0.11	0.9
mhdm4_2	1.2E-05 (2.3E-06-6.1E-05)	7.9E-06 (2.0E-06-3.1E-05)	0.01 (1.0E-04-1)	0.00013	0.68	0.00055	0.0001	0.004	1	0.025	0.0056
mhdm4_3	2.1E-06 (7.3E-07-6.2E-06)	3.7E-06 (1.0E-06-1.4E-05)	3.9E-06 (2.0E-07-7.7E-05)	0.8	0.53	0.65	0.96	1	1	1	1
mhdm4_5	2.3E-04 (1.7E-05-3.0E-03)	4.7E-04 (5.3E-05-4.3E-03)	5.3 (0.082-345)	0.00049	0.72	0.00045	0.00032	0.013	1	0.021	0.016
mhdm4r_6m	0.011 (6.1E-04-0.19)	0.028 (3.0E-03-0.26)	0.23 (1.1E-03-51)	0.85	0.91	0.67	0.57	1	1	1	1
mhdm4r_1	4.0E-03 (2.6E-04-0.062)	9.5E-03 (6.7E-04-0.14)	1.5E-03 (9.3E-06-0.25)	0.85	0.79	0.7	0.59	1	1	1	1
mhdm4r_2	1.5E-05 (2.8E-06-8.1E-05)	1.2E-05 (2.8E-06-5.3E-05)	7.1E-06 (4.1E-07-1.2E-04)	0.91	0.92	0.66	0.75	1	1	1	1
mhdm4r_3	3.2E-03 (1.9E-04-0.055)	0.012 (8.5E-04-0.17)	2.4 (9.0E-03-642)	0.023	0.54	0.0076	0.019	0.4	1	0.25	0.55
mhdm4r_5	0.27 (0.013-5.5)	1 (0.1-11)	3.2 (5.7E-03-1.8E+03)	0.095	0.75	0.035	0.05	1	1	0.9	1
mhdm5_cd	2.5E-04 (2.1E-05-2.9E-03)	2.6E-04 (2.8E-05-2.5E-03)	1.2E-05 (3.1E-07-4.6E-04)	0.47	0.96	0.24	0.25	1	1	1	1
mhdm5_6m	5.2E-05 (5.6E-06-4.8E-04)	3.1E-05 (5.2E-06-1.8E-04)	0.33 (1.3E-03-83)	0.00015	0.85	0.00023	0.00011	0.0045	1	0.012	0.0061
mhdm5_1	4.6E-06 (1.0E-06-2.0E-05)	2.2E-05 (2.9E-06-1.7E-04)	0.015 (1.0E-04-2.4)	0.00022	0.2	7.2e-05	0.0036	0.0063	1	0.0042	0.13
mhdm5_2	4.6E-06 (1.2E-06-1.7E-05)	3.7E-06 (1.2E-06-1.1E-05)	2.0E-03 (1.6E-05-0.25)	0.00017	0.8	0.00075	0.0002	0.005	1	0.033	0.011
mhdm5_3	2.2E-06 (7.2E-07-7.0E-06)	1.0E-06 (1.0E-06-1.0E-06)	1.9E-05 (2.5E-07-1.4E-03)	0.027	0.13	0.16	0.0048	0.46	1	1	0.17
mhdm5_5	0.021 (9.9E-04-0.43)	0.07 (5.7E-03-0.85)	246 (7-8.7E+03)	0.00013	0.49	7.1e-05	0.00011	0.004	1	0.0042	0.0061
mhdm9_cd	0.021 (1.0E-03-0.43)	6.0E-03 (4.2E-04-0.085)	5.9E-04 (3.4E-06-0.1)	0.5	0.67	0.28	0.33	1	1	1	1
mhdm9_6m	7.0E-03 (3.8E-04-0.13)	3.1E-03 (3.1E-04-0.032)	2 (3.4E-03-1.1E+03)	0.027	0.6	0.022	0.0088	0.46	1	0.62	0.29
mhdm9_1	8.1E-05 (7.7E-06-8.5E-04)	4.9E-04 (3.5E-05-6.9E-03)	3.6 (0.072-175)	0.00023	0.31	6.9e-05	0.0016	0.0065	1	0.0041	0.066
mhdm9_2	2.0E-06 (7.6E-07-5.0E-06)	2.4E-05 (4.5E-06-1.3E-04)	1.3E-03 (7.6E-06-0.23)	0.0012	0.016	0.00021	0.041	0.029	0.47	0.011	1
mhdm9_3	5.8E-06 (1.0E-06-3.2E-05)	1.4E-05 (2.1E-06-9.3E-05)	2.5E-03 (4.6E-06-1.4)	0.02	0.5	0.0078	0.029	0.36	1	0.26	0.77
mhdm9_5	3.3E-03 (1.0E-04-0.11)	9.6E-03 (5.4E-04-0.17)	1.5E+03 (4.2-5.4E+05)	0.00035	0.77	0.00024	0.00025	0.0094	1	0.012	0.013
mhdmg_cd	0.68 (0.031-15)	2.5 (0.18-34)	0.1 (2.4E-04-45)	0.67	0.9	0.48	0.37	1	1	1	1
mhdmg_6m	0.46 (0.024-9)	0.15 (0.012-1.8)	23 (0.074-6.9E+03)	0.043	0.46	0.045	0.014	0.68	1	1	0.42
mhdmg_1	1.2E-03 (7.0E-05-0.02)	6.9E-04 (4.3E-05-0.011)	0.054 (1.8E-04-16)	0.14	0.71	0.086	0.066	1	1	1	1
mhdmg_2	0.09 (8.3E-03-0.97)	0.31 (0.04-2.4)	0.068 (4.8E-04-9.6)	0.46	0.24	0.43	0.88	1	1	1	1
mhdmg_3	3.6E-06 (8.4E-07-1.5E-05)	5.7E-06 (1.3E-06-2.6E-05)	1.8E-05 (2.6E-07-1.3E-03)	0.63	0.66	0.33	0.55	1	1	1	1
mhdmg_5	0.013 (5.4E-04-0.31)	0.056 (3.8E-03-0.84)	8.5 (0.034-2.1E+03)	0.1	0.33	0.028	0.15	1	1	0.75	1
mhdmcish_2	6.3E-03 (3.3E-04-0.12)	0.035 (2.4E-03-0.53)	0.021 (7.8E-05-5.8)	0.58	0.3	0.96	0.63	1	1	1	1
mhdmdac_2	1.0E-06 (1.0E-06-1.0E-06)	1.2E-06 (8.4E-07-1.7E-06)	1.0E-06 (1.0E-06-1.0E-06)	0.58	0.37	NA	0.64	1	1	NA	1
mhdmplx_2	7.3E-05 (7.9E-06-6.7E-04)	1.1E-04 (1.4E-05-8.6E-04)	3.5E-05 (6.0E-07-2.1E-03)	0.88	0.78	0.78	0.64	1	1	1	1
hdm13_cd	0.22 (0.066-0.73)	0.22 (0.076-0.63)	0.085 (0.011-0.66)	0.68	0.76	0.41	0.45	1	1	1	1
hdm13_6m	0.064 (0.022-0.18)	0.06 (0.025-0.14)	19 (1.4-244)	4.6e-06	0.98	1.7e-05	4.1e-06	0.00017	1	0.0011	0.00033
hdm13_1	0.044 (0.016-0.12)	0.031 (0.014-0.07)	0.82 (0.071-9.5)	0.0028	0.53	0.0065	0.0015	0.063	1	0.22	0.063
hdm13_2	0.021 (0.011-0.04)	0.024 (0.013-0.046)	0.57 (0.058-5.6)	0.00018	0.79	0.00031	0.00045	0.0053	1	0.015	0.021
hdm13_3	0.03 (0.014-0.068)	0.035 (0.017-0.074)	0.37 (0.029-4.8)	0.027	0.78	0.016	0.017	0.46	1	0.47	0.5
hdm13_5	0.13 (0.046-0.37)	0.32 (0.11-0.87)	12 (1.2-117)	0.00021	0.29	7.7e-05	0.00051	0.0061	1	0.0045	0.024
hdm5_cd	0.043 (0.018-0.11)	0.026 (0.013-0.052)	0.018 (5.0E-03-0.068)	0.44	0.36	0.29	0.57	1	1	1	1
hdm5_6m	0.018 (9.2E-03-0.034)	0.013 (8.9E-03-0.02)	0.21 (0.012-3.7)	0.00079	0.4	0.0081	0.00035	0.02	1	0.27	0.017
hdm5_1	0.012 (8.5E-03-0.016)	0.012 (8.3E-03-0.017)	0.017 (5.6E-03-0.049)	0.58	0.92	0.41	0.36	1	1	1	1
hdm5_2	0.011 (8.7E-03-0.015)	0.021 (0.012-0.039)	0.044 (8.0E-03-0.25)	0.054	0.088	0.011	0.28	0.82	1	0.34	1
hdm5_3	0.016 (9.4E-03-0.026)	0.019 (0.011-0.033)	0.21 (0.018-2.4)	0.0021	0.65	0.0019	0.0039	0.05	1	0.077	0.14
hdm5_5	0.028 (0.014-0.057)	0.042 (0.02-0.087)	2.3 (0.25-22)	3.2e-06	0.45	5.7e-06	2e-05	0.00012	1	0.00043	0.0013
hdm10_cd	0.089 (0.032-0.24)	0.19 (0.066-0.53)	0.35 (0.038-3.2)	0.32	0.26	0.17	0.57	1	1	1	1
hdm10_6m	0.055 (0.02-0.15)	0.026 (0.013-0.051)	0.19 (0.012-3)	0.09	0.19	0.28	0.032	1	1	1	0.83
hdm10_1	0.02 (0.01-0.04)	0.014 (8.8E-03-0.021)	0.01 (0.01-0.01)	0.33	0.3	0.24	0.46	1	1	1	1
hdm10_2	0.011 (8.7E-03-0.015)	0.011 (8.9E-03-0.014)	0.01 (0.01-0.01)	0.87	0.91	0.61	0.64	1	1	1	1
hdm10_3	0.01 (0.01-0.01)	0.011 (8.9E-03-0.014)	0.01 (0.01-0.01)	0.59	0.37	NA	0.66	1	1	NA	1
hdm10_5	0.019 (0.011-0.032)	0.015 (0.01-0.023)	0.015 (6.2E-03-0.039)	0.82	0.55	0.75	1	1	1	1	1
hdmg_cd	0.085 (0.028-0.26)	0.081 (0.03-0.22)	0.057 (7.8E-03-0.42)	0.95	0.89	0.72	0.85	1	1	1	1
hdmg_6m	0.094 (0.028-0.32)	0.075 (0.028-0.2)	0.46 (0.012-17)	0.43	0.82	0.28	0.21	1	1	1	1
hdmg_1	0.038 (0.015-0.1)	0.019 (0.01-0.035)	0.055 (7.8E-03-0.38)	0.3	0.2	0.73	0.17	1	1	1	1
hdmg_2	0.012 (8.4E-03-0.017)	0.01 (0.01-0.01)	0.01 (0.01-0.01)	0.47	0.28	0.61	NA	1	1	1	NA
hdmg_3	0.029 (0.013-0.061)	0.022 (0.012-0.04)	0.038 (5.3E-03-0.27)	0.74	0.53	0.87	0.53	1	1	1	1
hdmg_5	0.023 (0.012-0.045)	0.049 (0.022-0.11)	0.017 (5.5E-03-0.053)	0.23	0.16	0.65	0.23	1	1	1	1
hdmt_1	0.01 (0.01-0.01)	0.015 (6.4E-03-0.035)	0.01 (0.01-0.01)	0.67	0.49	NA	0.73	1	1	NA	1
cat13_cd	2.8 (0.86-9.3)	1.6 (0.48-5.2)	1.3 (0.12-13)	0.78	0.63	0.52	0.77	1	1	1	1
fel13_cd	0.27 (0.057-1.3)	0.24 (0.04-1.4)	0.65 (2.9E-04-1.4E+03)	0.97	0.97	0.84	0.86	1	1	1	1
fel13_5	0.022 (0.01-0.049)	0.023 (0.011-0.047)	0.054 (4.3E-03-0.66)	0.61	0.98	0.38	0.37	1	1	1	1
cat5_cd	0.29 (0.092-0.93)	0.77 (0.25-2.4)	1.2 (0.12-12)	0.32	0.22	0.2	0.7	1	1	1	1
fel5_cd	0.061 (0.018-0.21)	0.038 (0.01-0.14)	0.068 (1.5E-04-30)	0.89	0.67	0.97	0.77	1	1	1	1
fel5_5	0.012 (8.2E-03-0.018)	0.014 (8.8E-03-0.021)	0.044 (4.8E-03-0.41)	0.086	0.73	0.049	0.083	1	1	1	1
cat10_cd	14 (5.2-36)	8.5 (3.2-22)	20 (4.1-101)	0.64	0.47	0.83	0.42	1	1	1	1
fel10_cd	0.1 (0.026-0.42)	0.11 (0.021-0.52)	0.01 (0.01-0.01)	0.48	0.97	0.24	0.26	1	1	1	1
fel10_5	0.01 (0.01-0.01)	0.01 (0.01-0.01)	0.01 (0.01-0.01)	NA	NA	NA	NA	NA	NA	NA	NA
catg_cd	4.5 (1.2-16)	4.5 (1.4-15)	0.98 (0.075-13)	0.44	0.87	0.21	0.25	1	1	1	1
felg_cd	0.091 (0.022-0.37)	0.17 (0.029-1)	0.66 (3.0E-04-1.5E+03)	0.56	0.56	0.35	0.48	1	1	1	1
felg_5	0.013 (7.7E-03-0.021)	0.014 (8.5E-03-0.024)	0.01 (0.01-0.01)	0.78	0.74	0.63	0.54	1	1	1	1
ara13_6m	0.01 (0.01-0.01)	0.01 (0.01-0.01)	0.033 (1.8E-03-0.63)	0.0078	NA	0.059	0.018	0.16	NA	1	0.52
ara13_1	0.012 (8.2E-03-0.018)	0.014 (8.7E-03-0.022)	0.01 (0.01-0.01)	0.69	0.65	0.58	0.45	1	1	1	1
pnt13_2	0.14 (0.04-0.47)	0.05 (0.021-0.12)	0.043 (4.9E-03-0.38)	0.27	0.13	0.31	0.92	1	1	1	1
pnt13_5	0.02 (0.01-0.04)	0.033 (0.016-0.068)	0.12 (0.011-1.3)	0.15	0.36	0.052	0.18	1	1	1	1
ara5_6m	0.01 (0.01-0.01)	0.012 (8.1E-03-0.019)	0.033 (1.8E-03-0.61)	0.12	0.43	0.059	0.18	1	1	1	1
ara5_1	0.01 (0.01-0.01)	0.01 (0.01-0.01)	0.01 (0.01-0.01)	NA	NA	NA	NA	NA	NA	NA	NA
pnt5_2	0.015 (8.6E-03-0.025)	0.018 (0.01-0.032)	0.023 (3.5E-03-0.16)	0.8	0.62	0.55	0.78	1	1	1	1
pnt5_5	0.01 (0.01-0.01)	0.011 (8.8E-03-0.014)	0.02 (4.5E-03-0.088)	0.18	0.39	0.073	0.25	1	1	1	1
ara10_6m	0.19 (0.04-0.89)	0.21 (0.057-0.74)	0.1 (2.6E-03-4.2)	0.94	0.82	0.94	0.76	1	1	1	1
ara10_1	0.01 (0.01-0.01)	0.012 (8.3E-03-0.017)	0.01 (0.01-0.01)	0.56	0.37	NA	0.61	1	1	NA	1
pnt10_2	0.01 (0.01-0.01)	0.018 (0.01-0.031)	0.01 (0.01-0.01)	0.15	0.082	NA	0.38	1	1	NA	1
pnt10_5	0.028 (0.013-0.06)	0.017 (0.01-0.029)	0.018 (5.2E-03-0.06)	0.57	0.32	0.58	0.97	1	1	1	1
arag_6m	3.3 (0.45-23)	10 (2.4-45)	1 (4.8E-03-212)	0.64	0.4	0.86	0.57	1	1	1	1
arag_1	0.012 (8.0E-03-0.02)	0.014 (8.7E-03-0.023)	0.01 (0.01-0.01)	0.7	0.67	0.58	0.45	1	1	1	1
pntg_2	0.012 (8.3E-03-0.017)	0.042 (0.017-0.1)	0.022 (3.8E-03-0.13)	0.082	0.026	0.29	0.62	1	0.71	1	1
pntg_5	0.014 (8.7E-03-0.023)	0.017 (0.01-0.027)	0.066 (7.5E-03-0.58)	0.074	0.66	0.04	0.063	1	1	1	1
arat_1	0.057 (4.0E-03-0.83)	0.1 (0.011-0.92)	0.14 (3.2E-05-596)	0.85	0.61	0.83	0.9	1	1	1	1
ova13_cd	1.2 (0.36-3.9)	1.2 (0.39-3.5)	0.13 (0.016-1.1)	0.21	0.84	0.098	0.097	1	1	1	1
ova13_6m	0.021 (9.0E-03-0.049)	0.018 (9.3E-03-0.033)	0.49 (0.014-17)	0.0033	0.77	0.0093	0.0019	0.074	1	0.3	0.077
ova13_1	0.033 (0.013-0.083)	0.03 (0.014-0.065)	0.065 (7.6E-03-0.56)	0.62	0.86	0.42	0.36	1	1	1	1
ova13_2	0.11 (0.033-0.35)	0.055 (0.022-0.14)	0.13 (6.8E-03-2.5)	0.58	0.39	0.78	0.43	1	1	1	1
ova13_5	0.14 (0.047-0.41)	0.12 (0.045-0.33)	0.052 (7.8E-03-0.34)	0.7	0.83	0.42	0.46	1	1	1	1
ova5_cd	0.13 (0.045-0.39)	0.12 (0.043-0.34)	0.077 (0.011-0.55)	0.88	0.88	0.68	0.63	1	1	1	1
ova5_6m	0.013 (7.8E-03-0.021)	0.01 (0.01-0.01)	0.055 (4.1E-03-0.74)	0.0051	0.27	0.058	0.002	0.11	1	1	0.08
ova5_1	0.01 (0.01-0.01)	0.01 (0.01-0.01)	0.01 (0.01-0.01)	NA	NA	NA	NA	NA	NA	NA	NA
ova5_2	0.018 (9.2E-03-0.036)	0.015 (9.4E-03-0.025)	0.01 (0.01-0.01)	0.67	0.71	0.4	0.46	1	1	1	1
ova5_5	0.014 (8.7E-03-0.023)	0.02 (0.011-0.037)	0.017 (5.5E-03-0.051)	0.61	0.33	0.65	0.81	1	1	1	1
ova10_cd	1.5 (0.44-4.8)	6 (2.2-16)	6.8 (0.84-55)	0.12	0.069	0.13	0.67	1	1	1	1
ova10_6m	0.07 (0.02-0.25)	0.14 (0.043-0.46)	0.18 (6.4E-03-5.3)	0.55	0.37	0.4	0.66	1	1	1	1
ova10_1	0.2 (0.056-0.7)	0.33 (0.1-1.1)	0.25 (0.018-3.3)	0.73	0.42	0.8	0.85	1	1	1	1
ova10_2	0.031 (0.013-0.075)	0.05 (0.021-0.12)	0.023 (3.4E-03-0.16)	0.6	0.41	0.83	0.48	1	1	1	1
ova10_5	3 (0.97-9.5)	2.9 (0.95-8.7)	1.1 (0.087-14)	0.72	0.76	0.51	0.45	1	1	1	1
ovag_cd	0.94 (0.23-3.8)	1.2 (0.33-4.5)	0.91 (0.074-11)	0.94	0.88	0.78	0.74	1	1	1	1
ovag_6m	0.19 (0.041-0.88)	0.4 (0.11-1.5)	0.21 (6.2E-03-7.4)	0.79	0.48	0.82	0.94	1	1	1	1
ovag_1	0.3 (0.072-1.3)	0.39 (0.11-1.4)	0.49 (0.034-6.9)	0.97	0.81	0.88	0.93	1	1	1	1
ovag_2	0.024 (0.01-0.056)	0.082 (0.029-0.23)	0.074 (3.6E-03-1.5)	0.23	0.093	0.33	0.95	1	1	1	1
ovag_5	0.14 (0.041-0.44)	0.25 (0.083-0.77)	0.058 (7.7E-03-0.44)	0.45	0.43	0.54	0.25	1	1	1	1
ovat_1	37 (5.7-238)	28 (6.8-112)	143 (15-1.3E+03)	0.65	0.67	0.66	0.39	1	1	1	1
rye13_2	0.52 (0.14-1.9)	0.076 (0.029-0.2)	1.1 (0.053-24)	0.038	0.029	0.54	0.046	0.62	0.77	1	1
rye13_3	0.068 (0.023-0.2)	0.059 (0.024-0.14)	1.7 (0.12-25)	0.0052	0.88	0.0047	0.0027	0.11	1	0.17	0.11
rye13_5	0.098 (0.036-0.26)	0.087 (0.035-0.22)	0.51 (0.042-6.1)	0.27	0.86	0.16	0.11	1	1	1	1
rye5_2	0.02 (0.01-0.041)	0.017 (0.01-0.027)	0.021 (4.0E-03-0.11)	0.88	0.67	0.95	0.73	1	1	1	1
rye5_3	0.01 (0.01-0.01)	0.015 (9.5E-03-0.023)	0.062 (7.5E-03-0.52)	0.0061	0.15	0.0019	0.039	0.13	1	0.077	0.98
rye5_5	0.02 (0.011-0.035)	0.024 (0.013-0.045)	0.045 (8.0E-03-0.25)	0.48	0.65	0.22	0.41	1	1	1	1
rye10_2	0.097 (0.033-0.29)	0.077 (0.031-0.19)	0.04 (5.0E-03-0.33)	0.68	0.79	0.37	0.48	1	1	1	1
rye10_3	0.49 (0.13-1.8)	1.8 (0.61-5.1)	2.9 (0.23-38)	0.18	0.14	0.13	0.38	1	1	1	1
rye10_5	0.14 (0.05-0.39)	0.18 (0.067-0.48)	0.27 (0.026-2.8)	0.81	0.73	0.58	0.62	1	1	1	1
ryeg_2	0.18 (0.052-0.64)	0.28 (0.092-0.85)	0.11 (6.8E-03-1.9)	0.84	0.72	0.76	0.6	1	1	1	1
ryeg_3	0.46 (0.12-1.8)	1 (0.32-3.3)	9.9 (0.66-148)	0.061	0.25	0.017	0.11	0.9	1	0.5	1
ryeg_5	0.092 (0.035-0.24)	0.073 (0.029-0.18)	0.11 (0.011-1.1)	0.91	0.76	0.83	0.7	1	1	1	1
lpsg10_cd	4.5 (1.3-16)	4 (0.91-18)	0.79 (2.4E-04-2.6E+03)	0.59	0.38	0.71	0.52	1	1	1	1
lpsg10_6m	1.2 (0.36-4.3)	0.73 (0.24-2.3)	0.86 (0.064-12)	0.91	0.88	0.68	0.74	1	1	1	1
lpsg10_1	2 (0.61-6.2)	10 (4.3-23)	1.4 (0.15-13)	0.039	0.032	0.65	0.055	0.63	0.83	1	1
lpsg10_2	21 (8.2-57)	20 (8.3-48)	1.6 (0.069-36)	0.11	0.92	0.053	0.039	1	1	1	0.98
lpsg10_3	31 (10-91)	17 (6-51)	5.2 (0.14-192)	0.88	0.73	0.9	0.65	1	1	1	1
lpsg10_5	99 (51-192)	112 (60-211)	188 (135-261)	0.75	0.48	0.72	0.74	1	1	1	1
lpsg12_cd	2.1 (0.35-12)	2 (0.26-15)	16 (6.0E-03-4.4E+04)	0.95	0.9	0.8	0.82	1	1	1	1
lpsg12_6m	302 (152-601)	101 (34-303)	88 (7.4-1.1E+03)	0.56	0.6	0.45	0.32	1	1	1	1
lpsg12_1	138 (54-352)	159 (67-378)	251 (55-1.1E+03)	0.35	0.2	0.26	0.79	1	1	1	1
lpsg_g_2	3.8E+03 (3.2E+03-4.5E+03)	3.2E+03 (2.7E+03-3.7E+03)	2.7E+03 (2.0E+03-3.8E+03)	0.16	0.15	0.1	0.45	1	1	1	1
lpsg_g_3	2.8E+03 (1.2E+03-6.3E+03)	4.1E+03 (3.6E+03-4.6E+03)	4.2E+03 (2.9E+03-6.2E+03)	0.92	0.86	0.67	0.77	1	1	1	1
lpsg_g_5	3.4E+03 (3.0E+03-4.0E+03)	3.5E+03 (2.9E+03-4.3E+03)	3.2E+03 (2.1E+03-4.8E+03)	0.9	0.62	0.99	0.93	1	1	1	1
lpsgt_2	555 (301-1.0E+03)	560 (342-916)	545 (329-902)	0.49	0.92	0.2	0.32	1	1	1	1
lpsgt_3	814 (588-1.1E+03)	519 (313-860)	241 (13-4.6E+03)	0.52	0.26	0.67	0.8	1	1	1	1
lpsgt_5	954 (481-1.9E+03)	1.2E+03 (777-2.0E+03)	1.9E+03 (1.0E+03-3.4E+03)	0.27	0.47	0.12	0.24	1	1	1	1
pha10_cd	291 (204-414)	239 (139-409)	340 (178-650)	0.82	0.91	0.57	0.55	1	1	1	1
pha10_6m	58 (31-109)	36 (17-75)	45 (12-167)	0.84	0.78	0.57	0.67	1	1	1	1
pha10_1	10 (3.4-29)	13 (5.2-32)	42 (12-146)	0.7	0.73	0.45	0.49	1	1	1	1
pha10_2	129 (108-154)	107 (69-165)	174 (127-238)	0.43	0.69	0.18	0.32	1	1	1	1
pha10_5	116 (78-172)	69 (37-129)	90 (27-293)	0.83	0.56	0.96	0.73	1	1	1	1
pha13_cd	869 (682-1.1E+03)	573 (319-1.0E+03)	679 (467-989)	0.58	0.94	0.29	0.36	1	1	1	1
pha13_6m	115 (58-227)	100 (53-186)	104 (23-472)	0.8	0.51	0.9	0.78	1	1	1	1
pha13_1	134 (81-221)	135 (73-251)	188 (42-845)	0.13	0.29	0.055	0.16	1	1	1	1
pha13_2	1.1E+03 (907-1.4E+03)	802 (544-1.2E+03)	1.5E+03 (967-2.3E+03)	0.061	0.095	0.34	0.037	0.9	1	1	0.94
pha13_5	1.0E+03 (805-1.3E+03)	697 (434-1.1E+03)	1.0E+03 (607-1.7E+03)	0.66	0.37	0.9	0.7	1	1	1	1
pha5_cd	7.7 (2.5-23)	17 (7.6-39)	15 (2.4-90)	0.87	1	0.79	0.5	1	1	1	1
pha5_6m	1.6 (0.47-5.1)	1 (0.35-3)	2.7 (0.28-26)	0.86	0.62	0.95	0.73	1	1	1	1
pha5_1	2.1 (0.58-7.3)	3.3 (1.1-9.9)	27 (4.9-149)	0.11	0.57	0.045	0.074	1	1	1	1
pha5_2	69 (34-138)	63 (33-119)	201 (152-265)	0.041	0.72	0.039	0.0091	0.65	1	0.98	0.29
pha5_5	129 (79-211)	50 (24-107)	181 (111-296)	0.31	0.18	0.78	0.29	1	1	1	1
phag_cd	222 (96-513)	322 (197-529)	237 (115-489)	0.33	0.57	0.3	0.13	1	1	1	1
phag_6m	11 (3.5-36)	11 (4-29)	2.4 (0.18-32)	0.48	0.46	0.25	0.49	1	1	1	1
phag_1	39 (15-98)	31 (12-79)	43 (7-263)	0.93	0.95	0.7	0.76	1	1	1	1
phag_2	376 (293-483)	423 (285-628)	394 (208-747)	0.46	0.21	0.87	0.63	1	1	1	1
phag_5	868 (643-1.2E+03)	676 (408-1.1E+03)	648 (343-1.2E+03)	0.7	0.8	0.44	0.46	1	1	1	1
phat_1	84 (10-687)	168 (101-279)	575 (152-2.2E+03)	0.09	0.97	0.056	0.035	1	1	1	0.9
seb10_cd	14 (4.4-47)	26 (10-68)	8.4 (0.24-294)	0.71	0.7	0.6	0.41	1	1	1	1
seb10_6m	63 (31-127)	68 (48-96)	92 (59-143)	0.11	0.039	0.67	0.37	1	0.98	1	1
seb10_1	68 (43-106)	53 (29-98)	107 (72-158)	0.34	0.67	0.15	0.22	1	1	1	1
seb10_2	48 (23-98)	58 (32-105)	100 (66-149)	0.86	0.65	0.65	0.93	1	1	1	1
seb10_5	169 (105-273)	140 (86-227)	141 (40-493)	0.39	0.24	0.57	0.36	1	1	1	1
seb13_cd	285 (223-365)	140 (56-348)	314 (185-532)	0.88	0.64	0.82	0.87	1	1	1	1
seb13_6m	135 (71-255)	137 (83-226)	238 (137-416)	0.39	0.87	0.26	0.16	1	1	1	1
seb13_1	159 (95-265)	142 (79-255)	177 (42-744)	0.17	0.82	0.058	0.11	1	1	1	1
seb13_2	280 (147-536)	298 (198-447)	447 (293-681)	0.57	0.46	0.71	0.33	1	1	1	1
seb13_5	569 (379-855)	452 (288-710)	824 (545-1.2E+03)	0.094	0.2	0.19	0.047	1	1	1	1
seb5_cd	4.6 (1.3-16)	3.5 (1-12)	10 (0.28-397)	0.36	0.74	0.19	0.18	1	1	1	1
seb5_6m	4.6 (1.4-15)	3.4 (1.2-9.5)	8.1 (0.8-83)	0.55	0.48	0.6	0.33	1	1	1	1
seb5_1	7.1 (2.1-24)	7.4 (2.4-22)	50 (13-195)	0.16	0.76	0.064	0.093	1	1	1	1
seb5_2	16 (5.7-46)	15 (6.1-39)	104 (72-149)	0.2	0.82	0.13	0.07	1	1	1	1
seb5_5	106 (60-189)	51 (25-104)	219 (145-332)	0.049	0.13	0.26	0.017	0.75	1	1	0.5
sebg_cd	7.7E+03 (5.3E+03-1.1E+04)	6.9E+03 (4.2E+03-1.1E+04)	1.0E+04 (4.9E+03-2.1E+04)	0.87	0.89	0.6	0.69	1	1	1	1
sebg_6m	2.6E+03 (1.4E+03-5.1E+03)	1.7E+03 (855-3.2E+03)	225 (13-4.0E+03)	0.1	0.21	0.047	0.18	1	1	1	1
sebg_1	4.2E+03 (3.1E+03-5.7E+03)	4.5E+03 (3.2E+03-6.3E+03)	4.0E+03 (2.1E+03-7.6E+03)	0.82	0.55	0.93	0.71	1	1	1	1
sebg_2	1.5E+03 (878-2.7E+03)	2.2E+03 (1.6E+03-3.0E+03)	1.2E+03 (492-3.1E+03)	0.55	0.55	0.63	0.26	1	1	1	1
sebg_5	4.8E+03 (2.5E+03-9.0E+03)	4.4E+03 (2.5E+03-7.6E+03)	4.8E+03 (2.9E+03-7.7E+03)	0.34	0.59	0.14	0.28	1	1	1	1
sebt_1	248 (141-437)	310 (243-396)	514 (184-1.4E+03)	0.22	0.73	0.1	0.14	1	1	1	1
rsv10_6m	0.01 (0.01-0.01)	0.01 (0.01-0.01)	0.01 (0.01-0.01)	NA	NA	NA	NA	NA	NA	NA	NA
rsv10_1	0.01 (0.01-0.01)	0.011 (8.9E-03-0.014)	0.032 (5.6E-03-0.18)	0.014	0.37	0.012	0.047	0.26	1	0.37	1
rsv13_6m	0.01 (0.01-0.01)	0.011 (8.8E-03-0.015)	0.01 (0.01-0.01)	0.58	0.37	NA	0.64	1	1	NA	1
rsv13_1	0.014 (8.8E-03-0.021)	0.011 (8.9E-03-0.014)	0.016 (6.0E-03-0.041)	0.57	0.44	0.74	0.3	1	1	1	1
rsv5_6m	0.012 (8.7E-03-0.015)	0.013 (9.0E-03-0.018)	0.01 (0.01-0.01)	0.73	0.67	0.62	0.5	1	1	1	1
rsv5_1	0.012 (8.7E-03-0.015)	0.01 (0.01-0.01)	0.01 (0.01-0.01)	0.46	0.28	0.6	NA	1	1	1	NA
rsvg_6m	0.012 (8.6E-03-0.016)	0.017 (0.01-0.029)	0.01 (0.01-0.01)	0.32	0.24	0.62	0.32	1	1	1	1
rsvg_1	0.015 (9.4E-03-0.025)	0.018 (0.011-0.031)	0.025 (6.6E-03-0.097)	0.68	0.64	0.38	0.61	1	1	1	1
rsvt_1	0.01 (0.01-0.01)	0.026 (6.5E-03-0.1)	0.11 (5.6E-05-207)	0.31	0.29	0.15	0.46	1	1	1	1
tt10_6m	0.018 (0.01-0.032)	0.019 (0.011-0.032)	0.017 (5.7E-03-0.048)	0.97	0.91	0.91	0.84	1	1	1	1
tt10_1	0.013 (8.9E-03-0.02)	0.028 (0.014-0.058)	0.046 (7.8E-03-0.27)	0.13	0.091	0.047	0.59	1	1	1	1
tt10_2	0.099 (0.031-0.32)	0.079 (0.032-0.2)	0.033 (5.7E-03-0.19)	0.61	0.71	0.35	0.41	1	1	1	1
tt10_5	0.59 (0.19-1.8)	1.2 (0.41-3.6)	0.58 (0.055-6.1)	0.53	0.26	0.98	0.62	1	1	1	1
tt13_6m	0.33 (0.096-1.1)	0.23 (0.079-0.68)	0.33 (0.027-4)	0.8	0.54	0.91	0.66	1	1	1	1
tt13_1	0.36 (0.1-1.3)	1.7 (0.51-5.4)	2.7 (0.22-33)	0.15	0.081	0.14	0.78	1	1	1	1
tt13_2	323 (149-698)	249 (129-481)	276 (48-1.6E+03)	0.58	0.42	0.91	0.36	1	1	1	1
tt13_5	423 (270-660)	326 (181-586)	517 (294-908)	0.96	0.93	0.78	0.81	1	1	1	1
tt5_6m	0.24 (0.074-0.75)	0.11 (0.042-0.31)	0.53 (0.044-6.5)	0.34	0.36	0.46	0.17	1	1	1	1
tt5_1	0.21 (0.063-0.69)	0.96 (0.31-3)	6.1 (0.66-56)	0.047	0.09	0.02	0.23	0.73	1	0.57	1
tt5_2	54 (17-168)	41 (16-107)	129 (25-664)	0.39	0.63	0.44	0.14	1	1	1	1
tt5_5	108 (54-217)	97 (46-202)	227 (119-432)	0.78	0.76	0.43	0.71	1	1	1	1
ttg_6m	0.67 (0.18-2.4)	0.52 (0.17-1.6)	0.47 (0.03-7.2)	0.86	0.58	0.99	0.84	1	1	1	1
ttg_1	0.89 (0.25-3.2)	1 (0.33-3.3)	0.39 (0.038-4.1)	0.76	0.73	0.65	0.46	1	1	1	1
ttg_2	49 (14-163)	35 (12-105)	3.1 (0.21-45)	0.018	0.92	0.0057	0.0092	0.32	1	0.2	0.3
ttg_5	93 (36-244)	85 (34-211)	12 (1.2-130)	0.16	0.82	0.062	0.083	1	1	1	1
tt_t_1	0.01 (0.01-0.01)	0.064 (0.011-0.38)	0.085 (9.5E-05-75)	0.25	0.11	0.15	0.81	1	1	1	1
ic10_cd	0.42 (0.17-1.1)	0.67 (0.27-1.7)	0.71 (0.11-4.5)	0.67	0.37	0.89	0.69	1	1	1	1
ic10_2	104 (48-226)	111 (60-205)	34 (3.8-301)	0.13	0.96	0.055	0.059	1	1	1	1
ic10_4	6.9 (3.4-14)	13 (7.7-21)	24 (8.7-65)	0.026	0.23	0.0081	0.046	0.45	1	0.27	1
ic10_5	436 (214-885)	425 (210-862)	448 (282-710)	0.7	0.98	0.43	0.45	1	1	1	1
ic10_10	3.4 (1.4-8.4)	0.84 (0.29-2.4)	2.6 (0.4-17)	0.28	0.11	0.57	0.62	1	1	1	1
ic1b_cd	0.92 (0.3-2.8)	1.1 (0.4-3.3)	0.53 (0.059-4.7)	0.71	0.82	0.49	0.41	1	1	1	1
ic1b_4	6.2 (2.2-17)	4.2 (1.5-12)	42 (9.2-196)	0.17	0.96	0.074	0.078	1	1	1	1
ic1b_10	0.012 (8.3E-03-0.017)	0.01 (0.01-0.01)	0.01 (0.01-0.01)	0.52	0.32	0.64	NA	1	1	1	NA
ic6_cd	14 (3.8-49)	18 (5.3-62)	31 (3.1-303)	0.83	0.72	0.55	0.75	1	1	1	1
ic6_4	324 (132-793)	553 (283-1.1E+03)	511 (70-3.7E+03)	0.1	0.62	0.029	0.076	1	1	0.77	1
ic6_10	493 (186-1.3E+03)	518 (222-1.2E+03)	1.7E+03 (1.0E+03-2.7E+03)	0.29	0.4	0.41	0.11	1	1	1	1
ic8_cd	82 (17-387)	21 (4.4-103)	90 (4.5-1.8E+03)	0.38	0.18	0.71	0.55	1	1	1	1
ic8_4	1.4 (0.31-6.7)	3.6 (0.86-15)	4.2 (0.13-135)	0.58	0.46	0.34	0.65	1	1	1	1
ic8_10	0.18 (0.043-0.73)	0.038 (0.013-0.11)	0.16 (6.6E-03-3.8)	0.19	0.073	0.93	0.26	1	1	1	1
icg_cd	1.5 (0.48-4.7)	2.9 (0.97-8.8)	1.3 (0.12-15)	0.66	0.37	0.84	0.7	1	1	1	1
icg_2	70 (27-181)	79 (35-180)	25 (2.8-232)	0.21	0.59	0.16	0.079	1	1	1	1
icg_4	110 (62-195)	126 (73-218)	184 (111-304)	0.42	0.24	0.34	0.96	1	1	1	1
icg_5	191 (87-419)	33 (8.3-130)	187 (86-408)	0.31	0.13	0.79	0.51	1	1	1	1
icg_10	324 (186-565)	269 (119-608)	593 (297-1.2E+03)	0.48	0.33	0.31	0.74	1	1	1	1
icip_cd	4.5E+03 (3.1E+03-6.5E+03)	3.2E+03 (1.9E+03-5.6E+03)	3.1E+03 (1.4E+03-7.2E+03)	0.62	0.42	0.43	0.75	1	1	1	1
icip_4	2.9E+03 (1.7E+03-4.8E+03)	3.2E+03 (2.5E+03-4.1E+03)	2.8E+03 (1.7E+03-4.8E+03)	0.66	0.63	0.37	0.55	1	1	1	1
icip_10	7.4E+03 (5.3E+03-1.0E+04)	6.8E+03 (4.9E+03-9.3E+03)	5.7E+03 (3.7E+03-8.8E+03)	0.15	0.46	0.065	0.11	1	1	1	1
icmp_cd	30 (11-84)	19 (6.9-55)	62 (15-250)	0.71	0.47	0.95	0.54	1	1	1	1
icmp_4	639 (313-1.3E+03)	981 (617-1.6E+03)	565 (77-4.2E+03)	0.19	0.76	0.062	0.13	1	1	1	1
icmp_10	856 (437-1.7E+03)	834 (434-1.6E+03)	1.3E+03 (623-2.8E+03)	0.93	0.87	0.9	0.63	1	1	1	1
ict_cd	0.052 (0.024-0.11)	0.077 (0.034-0.18)	0.068 (0.014-0.33)	0.78	0.5	0.76	0.82	1	1	1	1
ict_2	74 (35-156)	63 (29-136)	39 (4.5-340)	0.59	0.79	0.37	0.34	1	1	1	1
ict_4	2 (0.95-4.3)	3.6 (2-6.8)	4.5 (1.1-19)	0.2	0.19	0.11	0.42	1	1	1	1
ict_5	234 (169-323)	113 (49-259)	97 (4.2-2.2E+03)	0.26	0.28	0.59	0.12	1	1	1	1
ict_10	111 (65-189)	155 (104-232)	196 (141-272)	0.5	0.27	0.49	0.98	1	1	1	1
lta10_2	14 (4-51)	26 (9.9-71)	3.8 (0.12-126)	0.31	0.49	0.29	0.14	1	1	1	1
lta10_5	252 (186-341)	134 (45-397)	64 (3.3-1.3E+03)	0.57	0.91	0.35	0.31	1	1	1	1
ltag_2	7.1 (1.7-30)	6 (1.6-22)	2.1 (0.082-53)	0.58	0.94	0.3	0.36	1	1	1	1
ltag_5	10 (2-54)	0.77 (0.15-4.1)	3.9 (0.062-243)	0.054	0.026	0.85	0.11	0.82	0.71	1	1
ltat_2	30 (9.2-97)	69 (33-142)	15 (0.58-362)	0.68	0.68	0.56	0.4	1	1	1	1
ltat_5	195 (75-502)	144 (63-332)	74 (0.74-7.4E+03)	0.48	0.29	0.57	0.47	1	1	1	1
pi10_2	39 (15-103)	18 (7.2-47)	29 (2.8-305)	0.17	0.065	0.47	0.6	1	1	1	1
pi10_5	0.079 (0.017-0.38)	0.15 (0.034-0.68)	0.091 (3.0E-03-2.8)	0.8	0.51	0.93	0.82	1	1	1	1
pi13_2	224 (179-281)	128 (77-213)	254 (163-395)	0.044	0.053	0.36	0.044	0.69	1	1	1
pi13_5	22 (3.5-139)	28 (5.9-135)	25 (0.44-1.4E+03)	0.83	0.69	0.51	0.93	1	1	1	1
pi5_2	93 (52-166)	32 (13-76)	153 (90-261)	0.045	0.093	0.24	0.03	0.7	1	1	0.79
pi5_5	2.4 (0.36-17)	1.6 (0.31-8.1)	12 (0.29-524)	0.5	0.9	0.33	0.25	1	1	1	1
pig_2	5.1E+03 (4.1E+03-6.3E+03)	3.6E+03 (2.1E+03-6.3E+03)	4.2E+03 (2.4E+03-7.3E+03)	0.63	0.35	0.62	0.93	1	1	1	1
pig_5	265 (165-428)	96 (36-262)	192 (91-403)	0.59	0.31	0.63	0.91	1	1	1	1
ps10_2	11 (3.3-38)	32 (15-67)	9.5 (0.45-201)	0.59	0.44	0.86	0.36	1	1	1	1
ps10_5	245 (183-328)	251 (176-356)	48 (1.4-1.6E+03)	0.4	1	0.2	0.24	1	1	1	1
psg_2	15 (3.7-60)	15 (4.5-51)	1.7 (0.038-75)	0.46	0.92	0.26	0.23	1	1	1	1
psg_5	72 (18-279)	16 (2.8-90)	15 (0.14-1.6E+03)	0.81	0.52	0.8	1	1	1	1	1
pst_2	58 (18-183)	171 (105-278)	22 (0.74-631)	0.41	0.42	0.49	0.22	1	1	1	1
pst_5	595 (410-863)	350 (149-818)	62 (0.14-2.9E+04)	0.55	0.39	0.45	0.62	1	1	1	1
msl10_5	0.059 (0.015-0.23)	0.1 (0.028-0.38)	0.27 (0.013-5.6)	0.48	0.44	0.25	0.55	1	1	1	1
msl13_5	0.49 (0.084-2.8)	0.34 (0.08-1.5)	1.6 (0.069-35)	0.74	0.67	0.7	0.47	1	1	1	1
msl5_5	0.034 (0.01-0.11)	0.04 (0.014-0.12)	0.022 (3.7E-03-0.13)	0.85	0.85	0.73	0.57	1	1	1	1
mslg_5	3.7 (0.59-24)	5.5 (1.2-26)	19 (1-373)	0.72	0.76	0.48	0.51	1	1	1	1
ppd10_cd	0.024 (0.011-0.052)	0.017 (9.3E-03-0.032)	0.026 (2.7E-03-0.25)	0.69	0.41	1	0.63	1	1	1	1
ppd13_cd	0.057 (0.02-0.16)	0.069 (0.024-0.19)	0.026 (2.7E-03-0.26)	0.73	0.79	0.53	0.44	1	1	1	1
ppd5_cd	0.015 (8.5E-03-0.026)	0.014 (8.7E-03-0.023)	0.027 (2.6E-03-0.27)	0.65	0.92	0.43	0.41	1	1	1	1
ppdg_cd	0.023 (0.01-0.05)	0.015 (8.3E-03-0.029)	0.027 (2.6E-03-0.27)	0.54	0.33	0.88	0.37	1	1	1	1
hiswl6m	1.8 (1.7-2)	1.8 (1.7-1.9)	1.9 (1.6-2.2)	0.87	0.87	0.68	0.59	1	1	1	1
hiswl2	3.4 (3.1-3.8)	3.4 (3.2-3.7)	4.1 (3.1-5.1)	0.4	0.66	0.2	0.24	1	1	1	1
hiswl5	2.5 (2.3-2.6)	2.6 (2.5-2.8)	2.8 (2.2-3.4)	0.65	0.39	0.89	0.59	1	1	1	1
hiswl10	4.2 (3.9-4.4)	4.2 (3.9-4.5)	4.4 (3.8-5.1)	0.6	0.78	0.41	0.32	1	1	1	1
hdmwl6m	0.091 (0-0.18)	0.051 (0-0.12)	0.34 (0-0.75)	0.04	0.29	0.11	0.01	0.64	1	1	0.32
hdmwl2	0.44 (0.17-0.72)	0.67 (0.35-0.99)	6.2 (4.5-7.9)	5.9e-15	0.54	3.9e-13	1.4e-12	1.3e-12	1	2.6e-10	6.7e-10
hdmwl5	1.1 (0.6-1.5)	1.9 (1.4-2.5)	5.5 (4.2-6.9)	1.3e-08	0.026	5.9e-09	2e-06	7.6e-07	0.71	9.1e-07	0.00017
hdmwl10	4.1 (3.4-4.8)	4.8 (4.2-5.3)	7 (4.9-9.1)	0.0022	0.046	0.0017	0.016	0.051	1	0.07	0.47
catwl6m	0.091 (0-0.2)	0.11 (0.012-0.21)	0.32 (0-0.74)	0.15	0.67	0.064	0.12	1	1	1	1
catwl2	0.35 (0.18-0.51)	0.4 (0.22-0.58)	1.4 (0.56-2.3)	0.0096	0.89	0.0045	0.0058	0.19	1	0.16	0.2
catwl5	0.33 (0.16-0.49)	0.56 (0.32-0.79)	1.9 (0.6-3.2)	0.004	0.3	0.001	0.0097	0.087	1	0.043	0.31
catwl10	3.5 (2.9-4.1)	4.6 (2.5-6.7)	6.5 (0-15)	0.36	0.79	0.2	0.27	1	1	1	1
ryewl6m	0.085 (0-0.2)	0 (0-0)	0.2 (0-0.47)	0.0018	0.056	0.065	0.00012	0.043	1	1	0.0066
ryewl2	0.25 (0.1-0.4)	0.22 (0.11-0.33)	1.9 (0.82-2.9)	5e-06	1	2e-05	7.4e-06	0.00018	1	0.0013	0.00054
ryewl5	0.37 (0.091-0.66)	0.63 (0.33-0.92)	3.1 (1.8-4.4)	4.1e-09	0.11	2.8e-09	7.2e-07	2.6e-07	1	4.7e-07	6.7e-05
ryewl10	4.5 (3.8-5.2)	3.6 (3-4.2)	4.7 (3.8-5.7)	0.025	0.021	0.66	0.033	0.43	0.59	1	0.86
altwl6m	0.057 (0-0.12)	0.014 (0-0.042)	0.11 (0-0.31)	0.096	0.23	0.27	0.022	1	1	1	0.62
altwl2	0.14 (0.031-0.25)	0.089 (0-0.19)	0.091 (0-0.28)	0.59	0.34	0.59	1	1	1	1	1
altwl5	0.13 (0-0.26)	0.41 (0.2-0.62)	0.36 (0-0.77)	0.059	0.018	0.14	0.82	0.89	0.52	1	1
aspwl6m	0.023 (0-0.054)	0.061 (5.4E-03-0.12)	0.45 (0.1-0.81)	3e-05	0.36	4.6e-05	0.00045	0.00099	1	0.0028	0.021
aspwl2	0.27 (0.13-0.42)	0.14 (0.046-0.23)	0.52 (0-1.1)	0.2	0.15	0.56	0.13	1	1	1	1
aspwl5	0.18 (0.031-0.34)	0.35 (0.054-0.65)	0.6 (0-1.2)	0.24	0.57	0.091	0.2	1	1	1	1
mouwl10	3.5 (2.3-4.7)	3 (2.3-3.8)	3.5 (2.9-4.1)	0.12	0.16	1	0.094	1	1	1	1
cmwl6m	0.18 (0.014-0.35)	0.43 (0.13-0.74)	1.8 (0.65-2.9)	0.00024	0.26	8.2e-05	0.0013	0.0068	1	0.0047	0.055
cmwl2	0.23 (0.097-0.37)	0.26 (0.093-0.42)	2.5 (0.98-3.9)	1.8e-06	0.8	1e-05	3.5e-06	7.5e-05	1	0.00072	0.00028
cmwl5	0 (0-0)	0.022 (0-0.066)	0.78 (0-1.8)	2e-06	0.35	5.7e-05	0.00027	8.2e-05	1	0.0034	0.014
ewwl6m	0.41 (0.085-0.73)	1.1 (0.54-1.7)	4.7 (2.5-6.9)	1.1e-06	0.2	3.7e-07	4.7e-05	4.6e-05	1	3.7e-05	0.0029
ewwl2	0.24 (0-0.51)	0.78 (0.34-1.2)	5.8 (3-8.5)	2.6e-09	0.021	1.3e-09	2.5e-06	1.7e-07	0.59	2.3e-07	0.00021
ewwl5	0 (0-0)	0.094 (0-0.2)	2.3 (0.97-3.6)	3.9e-16	0.1	1.4e-11	1e-09	1.1e-13	1	4.7e-09	1.8e-07
pntwl5	0.013 (0-0.038)	0.26 (0.076-0.45)	1.5 (0.063-2.9)	0.00017	0.026	1.2e-05	0.011	0.005	0.71	0.00083	0.34
pntwl10	3 (NA-NA)	3 (0-10)	1.8 (0-24)	0.97	1	1	1	1	1	1	1
couwl10	5.2 (4.4-6)	4.1 (3.2-4.9)	5.3 (3.7-7)	0.17	0.062	0.64	0.24	1	1	1	1
grwl10	4 (3.4-4.7)	3.4 (2.7-4)	4.1 (3.2-5)	0.17	0.092	0.87	0.15	1	1	1	1
totige_100_6m	0% (0%-0%)	1.9% (0%-4.6%)	9.1% (0%-22%)	0.029	0.5	0.04	0.14	0.48	1	1	1
totige_100_1	0% (0%-0%)	2.8% (0%-6%)	36% (15%-58%)	1.2e-07	0.26	9.1e-07	2.5e-05	5.9e-06	1	8.4e-05	0.0016
totige_100_2	6.9% (1.5%-12%)	9.6% (3.9%-15%)	73% (53%-93%)	1.2e-10	0.6	6.3e-10	3.2e-09	1.1e-08	1	1.2e-07	5.3e-07
totige_100_3	6% (0.8%-11%)	15% (7.8%-22%)	86% (71%-100%)	7.5e-14	0.061	1.5e-13	1.9e-10	1.2e-11	1	1.2e-10	4.5e-08
totige_100_4	12% (4.3%-19%)	26% (17%-35%)	86% (69%-100%)	4.7e-10	0.019	1.8e-10	7e-07	3.6e-08	0.55	4.4e-08	6.6e-05
totige_100_5	27% (16%-38%)	35% (25%-46%)	94% (83%-100%)	4.8e-07	0.29	1.9e-07	6.1e-06	2.2e-05	1	2e-05	0.00046
totige_100_10	48% (34%-62%)	60% (47%-73%)	100% (100%-100%)	0.00066	0.25	0.00037	0.003	0.017	1	0.018	0.12
hdmige_035_6m	0% (0%-0%)	1.9% (0%-4.6%)	14% (0%-29%)	0.0045	0.5	0.0075	0.037	0.097	1	0.25	0.94
hdmige_035_1	0% (0%-0%)	1.9% (0%-4.5%)	50% (27%-73%)	2.9e-11	0.5	2e-09	1.7e-08	2.8e-09	1	3.5e-07	2.3e-06
hdmige_035_2	2.3% (0%-5.5%)	14% (7.6%-21%)	86% (71%-100%)	2e-16	0.0039	3.8e-16	1.2e-10	6.9e-14	0.14	4.8e-13	3.1e-08
hdmige_035_3	12% (4.9%-19%)	19% (11%-27%)	91% (78%-100%)	2.1e-12	0.23	3.5e-12	2.1e-10	2.7e-10	1	1.4e-09	4.8e-08
hdmige_035_4	12% (4.3%-19%)	34% (24%-44%)	90% (77%-100%)	2e-11	0.00083	1.1e-11	2.8e-06	2e-09	0.036	3.9e-09	0.00023
hdmige_035_5	23% (13%-33%)	39% (28%-50%)	89% (73%-100%)	1.1e-06	0.035	4e-07	0.00015	4.6e-05	0.9	4e-05	0.0082
hdmige_035_10	49% (35%-63%)	58% (45%-72%)	100% (100%-100%)	0.00084	0.44	0.00037	0.0029	0.021	1	0.018	0.11
catige_035_6m	1.2% (0%-3.5%)	1.9% (0%-4.6%)	9.1% (0%-22%)	0.17	1	0.1	0.14	1	1	1	1
catige_035_1	0% (0%-0%)	0% (0%-0%)	14% (0%-29%)	0.00094	1	0.0075	0.0044	0.024	1	0.25	0.16
catige_035_2	0% (0%-0%)	2.9% (0%-6.2%)	23% (3.7%-42%)	9.8e-05	0.25	0.00023	0.0042	0.0031	1	0.012	0.15
catige_035_3	3.6% (0%-7.7%)	2% (0%-4.7%)	23% (3.7%-42%)	0.0023	0.66	0.0096	0.002	0.053	1	0.31	0.08
catige_035_4	0% (0%-0%)	5.7% (0.75%-11%)	24% (3.9%-44%)	0.00026	0.061	0.00028	0.022	0.0072	1	0.014	0.62
catige_035_5	0% (0%-0%)	8.9% (2.5%-15%)	39% (14%-64%)	3.3e-06	0.015	5e-06	0.0038	0.00013	0.45	0.00039	0.14
catige_035_10	17% (6.7%-28%)	20% (9.1%-31%)	71% (44%-98%)	0.00029	0.81	0.00023	0.00049	0.008	1	0.012	0.023
pntige_035_6m	2.3% (0%-5.6%)	4.8% (0.63%-9%)	41% (19%-63%)	1.5e-06	0.46	5.4e-06	3.5e-05	6.3e-05	1	0.00042	0.0022
pntige_035_1	3.5% (0%-7.4%)	5.6% (1.2%-10%)	68% (47%-89%)	3.7e-12	0.73	1.3e-10	4.3e-10	4.6e-10	1	3.3e-08	9.1e-08
pntige_035_2	1.1% (0%-3.4%)	2.9% (0%-6.2%)	64% (42%-85%)	1.8e-13	0.63	2.8e-11	1.3e-10	2.6e-11	1	8.3e-09	3.3e-08
pntige_035_3	4.8% (0.11%-9.5%)	0.99% (0%-3%)	45% (23%-68%)	9.6e-09	0.18	1.4e-05	4.3e-08	5.7e-07	1	0.00096	5.4e-06
pntige_035_4	1.3% (0%-3.8%)	3.4% (0%-7.3%)	52% (29%-76%)	1.3e-09	0.62	3e-08	2.5e-07	9.1e-08	1	3.9e-06	2.6e-05
pntige_035_5	7.4% (0.99%-14%)	13% (5.2%-20%)	56% (30%-81%)	3.7e-05	0.41	2.2e-05	0.00026	0.0012	1	0.0014	0.013
pntige_035_10	21% (9.7%-33%)	18% (7.7%-29%)	64% (36%-93%)	0.0027	0.81	0.0034	0.0014	0.062	1	0.13	0.059
couige_035_6m	1.2% (0%-3.5%)	0.96% (0%-2.9%)	4.5% (0%-14%)	0.46	1	0.37	0.32	1	1	1	1
couige_035_1	0% (0%-0%)	0% (0%-0%)	4.5% (0%-14%)	0.1	1	0.2	0.17	1	1	1	1
couige_035_2	1.1% (0%-3.4%)	0.96% (0%-2.9%)	9.1% (0%-22%)	0.054	1	0.1	0.079	0.82	1	1	1
couige_035_3	2.4% (0%-5.8%)	2% (0%-4.7%)	36% (15%-58%)	2.3e-06	1	3.9e-05	1.1e-05	9.1e-05	1	0.0024	0.00078
couige_035_4	3.8% (0%-8.2%)	6.8% (1.4%-12%)	57% (34%-80%)	2e-08	0.5	1.1e-07	1e-06	1.1e-06	1	1.3e-05	9.1e-05
couige_035_5	8.8% (1.9%-16%)	16% (8.1%-25%)	72% (49%-95%)	2.7e-07	0.22	1.8e-07	8.6e-06	1.2e-05	1	1.9e-05	0.00062
couige_035_10	35% (21%-48%)	29% (17%-41%)	86% (65%-100%)	0.00036	0.68	0.00081	0.00017	0.0096	1	0.036	0.0092
ryeige_035_6m	1.2% (0%-3.5%)	2.9% (0%-6.2%)	4.5% (0%-14%)	0.4	0.63	0.37	0.54	1	1	1	1
ryeige_035_1	0% (0%-0%)	0% (0%-0%)	4.5% (0%-14%)	0.1	1	0.2	0.17	1	1	1	1
ryeige_035_3	6% (0.8%-11%)	3% (0%-6.3%)	50% (27%-73%)	5.6e-08	0.47	6.9e-06	1.3e-07	2.9e-06	1	0.00051	1.5e-05
ryeige_035_4	5.1% (0.12%-10%)	10% (3.8%-17%)	71% (50%-92%)	1.6e-10	0.26	7.4e-10	3.9e-08	1.4e-08	1	1.4e-07	5e-06
ryeige_035_5	10% (2.8%-17%)	22% (12%-31%)	78% (57%-99%)	9.5e-08	0.074	3.8e-08	1.2e-05	4.9e-06	1	4.9e-06	0.00083
ryeige_035_10	40% (27%-54%)	40% (27%-53%)	86% (65%-100%)	0.0057	1	0.0053	0.0027	0.12	1	0.19	0.11
mouige_035_6m	0% (0%-0%)	0.96% (0%-2.9%)	4.5% (0%-14%)	0.2	1	0.2	0.32	1	1	1	1
mouige_035_1	0% (0%-0%)	0% (0%-0%)	0% (0%-0%)	1	1	1	1	1	1	1	1
mouige_035_2	1.1% (0%-3.4%)	1.9% (0%-4.6%)	0% (0%-0%)	1	1	1	1	1	1	1	1
mouige_035_3	7.2% (1.5%-13%)	4% (0.091%-7.8%)	14% (0%-29%)	0.16	0.35	0.39	0.11	1	1	1	1
mouige_035_4	1.3% (0%-3.8%)	9.1% (3%-15%)	9.5% (0%-23%)	0.047	0.037	0.11	1	0.73	0.94	1	1
mouige_035_5	2.9% (0%-7.1%)	10% (3.3%-17%)	22% (0.95%-43%)	0.027	0.11	0.016	0.23	0.46	1	0.47	1
mouige_035_10	15% (5.2%-26%)	20% (9.1%-31%)	79% (54%-100%)	1.9e-05	0.62	1.7e-05	7.9e-05	0.00065	1	0.0011	0.0046
phinfige_035_6m	8.1% (2.2%-14%)	21% (13%-29%)	68% (47%-89%)	4.8e-08	0.015	2e-08	3.5e-05	2.5e-06	0.45	2.7e-06	0.0022
phinfige_035_1	14% (6.5%-21%)	36% (27%-46%)	100% (100%-100%)	2e-14	0.0005	1.1e-14	6.1e-09	4.1e-12	0.023	1e-11	9.2e-07
phinfige_035_2	10% (3.8%-17%)	43% (34%-53%)	100% (100%-100%)	4.1e-17	3.4e-07	3.3e-16	1.4e-07	1.7e-14	3.4e-05	4.5e-13	1.6e-05
phinfige_035_3	14% (6.7%-22%)	50% (40%-59%)	100% (100%-100%)	2.4e-15	4.1e-07	2.2e-14	1.7e-06	5.8e-13	4e-05	1.9e-11	0.00015
phinfige_035_4	18% (9.2%-27%)	49% (38%-60%)	100% (100%-100%)	5.7e-13	3.5e-05	1.4e-12	3e-06	7.7e-11	0.0022	6.7e-10	0.00025
phadige_035_5	22% (12%-33%)	48% (37%-59%)	100% (100%-100%)	9.3e-10	0.0018	8.6e-10	2.3e-05	6.7e-08	0.074	1.6e-07	0.0015
hisspt6m	57% (46%-67%)	55% (46%-65%)	64% (42%-85%)	0.78	0.89	0.63	0.49	1	1	1	1
hisspt2	89% (82%-95%)	97% (94%-100%)	95% (86%-100%)	0.038	0.021	0.69	0.53	0.62	0.59	1	1
hisspt5	30% (20%-41%)	39% (29%-49%)	29% (7.5%-50%)	0.44	0.26	1	0.46	1	1	1	1
hisspt10	98% (95%-100%)	100% (100%-100%)	100% (100%-100%)	0.53	0.46	1	1	1	1	1	1
hdmspt6m	2.3% (0%-5.4%)	1.9% (0%-4.5%)	14% (0%-29%)	0.043	1	0.054	0.035	0.68	1	1	0.9
hdmspt2	10% (3.8%-17%)	15% (8.1%-22%)	86% (71%-100%)	2.9e-12	0.39	8.2e-12	1.5e-10	3.7e-10	1	3e-09	3.7e-08
hdmspt5	13% (5.2%-20%)	28% (18%-37%)	81% (63%-99%)	1.5e-08	0.022	4.6e-09	1e-05	8.7e-07	0.62	7.2e-07	0.00072
hdmspt10	36% (23%-49%)	51% (38%-63%)	78% (57%-99%)	0.0074	0.11	0.0027	0.06	0.15	1	0.11	1
catspt6m	3.4% (0%-7.3%)	4.7% (0.61%-8.7%)	9.1% (0%-22%)	0.4	0.73	0.26	0.34	1	1	1	1
catspt2	14% (6.3%-21%)	14% (7.3%-21%)	41% (19%-63%)	0.011	1	0.012	0.0063	0.22	1	0.37	0.22
catspt5	0% (0%-0%)	5.6% (0.73%-10%)	25% (4.2%-46%)	0.00019	0.061	0.00022	0.017	0.0055	1	0.011	0.5
catspt10	6.9% (0.18%-14%)	12% (4%-20%)	17% (0%-36%)	0.4	0.38	0.35	0.69	1	1	1	1
ryespt6m	1.1% (0%-3.4%)	0% (0%-0%)	4.5% (0%-14%)	0.092	0.45	0.36	0.17	1	1	1	1
ryespt2	10% (3.8%-17%)	7.5% (2.4%-13%)	45% (23%-68%)	7.1e-05	0.61	0.00043	5.2e-05	0.0023	1	0.02	0.0031
ryespt5	3.8% (0%-8.1%)	7.8% (2.1%-13%)	50% (26%-74%)	2.2e-06	0.34	2.4e-06	3.9e-05	8.8e-05	1	0.0002	0.0024
ryespt10	21% (9.9%-31%)	24% (13%-34%)	56% (30%-81%)	0.017	0.83	0.0073	0.019	0.31	1	0.24	0.55
altspt6m	2.3% (0%-5.4%)	0% (0%-0%)	4.5% (0%-14%)	0.078	0.2	0.49	0.17	1	1	1	1
altspt2	4.5% (0.11%-9%)	0.93% (0%-2.8%)	4.5% (0%-14%)	0.23	0.18	1	0.31	1	1	1	1
altspt5	1.3% (0%-3.8%)	6.7% (1.4%-12%)	4.8% (0%-15%)	0.16	0.12	0.38	1	1	1	1	1
aspspt6m	0% (0%-0%)	0.93% (0%-2.8%)	18% (0.68%-36%)	0.00038	1	0.0013	0.0029	0.01	1	0.055	0.11
aspspt2	10% (3.8%-17%)	4.7% (0.61%-8.7%)	14% (0%-29%)	0.15	0.17	0.7	0.14	1	1	1	1
aspspt5	1.3% (0%-3.8%)	4.4% (0.1%-8.8%)	15% (0%-32%)	0.032	0.37	0.025	0.11	0.53	1	0.69	1
cmspt6m	3.4% (0%-7.3%)	7.5% (2.4%-13%)	36% (15%-58%)	0.00012	0.35	8.7e-05	0.0011	0.0037	1	0.005	0.047
cmspt2	9.1% (3%-15%)	6.5% (1.8%-11%)	50% (27%-73%)	4.7e-06	0.59	5.1e-05	4.5e-06	0.00017	1	0.0031	0.00035
cmspt5	0% (0%-0%)	0% (0%-0%)	5% (0%-15%)	0.11	1	0.2	0.18	1	1	1	1
ewspt6m	6.8% (1.4%-12%)	15% (8.1%-22%)	55% (32%-77%)	4.6e-06	0.11	1.9e-06	0.00019	0.00017	1	0.00016	0.01
ewspt2	5.7% (0.75%-11%)	14% (7.3%-21%)	59% (37%-81%)	1.8e-07	0.062	1e-07	2.4e-05	8.6e-06	1	1.2e-05	0.0016
ewspt5	0% (0%-0%)	2.2% (0%-5.3%)	29% (7.5%-50%)	1.1e-05	0.5	4.6e-05	0.00052	0.00039	1	0.0028	0.024
sptany6m	16% (8.1%-24%)	21% (14%-29%)	64% (42%-85%)	4.4e-05	0.36	2.1e-05	0.00018	0.0014	1	0.0014	0.0096
sptany2	34% (24%-44%)	36% (27%-46%)	100% (100%-100%)	3.7e-09	0.77	3.6e-09	6.1e-09	2.3e-07	1	5.9e-07	9.2e-07
sptany5	16% (8.1%-25%)	38% (28%-48%)	90% (77%-100%)	8.5e-10	0.0021	4e-10	1.3e-05	6.2e-08	0.084	8.6e-08	0.0009
sptany10	52% (38%-65%)	60% (48%-72%)	89% (73%-100%)	0.014	0.37	0.0054	0.026	0.26	1	0.19	0.71

## Sheet: respmicro
variable	mean_95CI_1	mean_95CI_2	mean_95CI_3	p_all	p_1_vs_2	p_1_vs_3	p_2_vs_3	p_all_adj	p_1_vs_2_adj	p_1_vs_3_adj	p_2_vs_3_adj
ari_1	4.4 (3.9-4.9)	3.6 (3.1-4.1)	4.5 (3.3-5.6)	0.044	0.018	0.86	0.16	0.69	0.52	1	1
ari_2	4.5 (3.8-5.2)	3.6 (3.2-4)	4.7 (3.4-6)	0.13	0.13	0.56	0.077	1	1	1	1
ari_3	3.7 (3.1-4.3)	3.4 (3-3.9)	4 (2.7-5.4)	0.74	0.56	0.77	0.53	1	1	1	1
ari_4	3 (2.4-3.6)	2.7 (2.2-3.2)	3.7 (2.4-4.9)	0.28	0.48	0.28	0.11	1	1	1	1
ari_5	2 (1.5-2.5)	1.9 (1.5-2.3)	1.5 (0.9-2.1)	0.94	0.83	0.89	0.74	1	1	1	1
uri_1	2.9 (2.4-3.3)	2.6 (2.2-3)	2.5 (1.7-3.3)	0.59	0.34	0.5	0.96	1	1	1	1
uri_2	3.2 (2.6-3.7)	2.6 (2.2-3)	2.5 (1.2-3.8)	0.19	0.19	0.12	0.34	1	1	1	1
uri_3	2.7 (2.2-3.2)	2.8 (2.4-3.3)	2.2 (1.3-3.2)	0.45	0.41	0.59	0.24	1	1	1	1
uri_4	2.1 (1.7-2.6)	2.2 (1.8-2.7)	1.7 (0.77-2.7)	0.5	0.94	0.26	0.27	1	1	1	1
uri_5	1.6 (1.1-2)	1.5 (1.2-1.9)	0.67 (0.2-1.1)	0.081	0.76	0.047	0.026	1	1	1	0.71
lri_1	1.6 (1.2-1.9)	0.98 (0.76-1.2)	2 (1.3-2.6)	0.004	0.021	0.17	0.0026	0.087	0.59	1	0.1
lri_2	1.4 (0.98-1.7)	1 (0.81-1.2)	2.2 (1.6-2.9)	0.0025	0.83	0.0061	0.0002	0.058	1	0.21	0.011
lri_3	1 (0.76-1.3)	0.6 (0.4-0.8)	1.8 (1.1-2.6)	0.00061	0.02	0.039	0.00027	0.016	0.57	0.98	0.014
lri_4	0.87 (0.52-1.2)	0.46 (0.3-0.63)	2 (1.1-2.8)	1.7e-05	0.3	0.00035	1.6e-06	0.00059	1	0.017	0.00014
lri_5	0.42 (0.24-0.6)	0.36 (0.24-0.48)	0.86 (0.44-1.3)	0.019	1	0.011	0.0075	0.34	1	0.34	0.25
wlri_1	0.47 (0.3-0.63)	0.24 (0.15-0.34)	0.64 (0.19-1.1)	0.054	0.036	0.61	0.065	0.82	0.92	1	1
wlri_2	0.68 (0.45-0.91)	0.41 (0.26-0.56)	1 (0.56-1.5)	0.0052	0.063	0.066	0.0017	0.11	1	1	0.07
wlri_3	0.59 (0.37-0.81)	0.3 (0.17-0.44)	1.4 (0.78-2.1)	4.6e-05	0.065	0.0025	6.6e-06	0.0015	1	0.098	0.00049
wlri_4	0.52 (0.25-0.79)	0.32 (0.18-0.46)	1.9 (0.95-2.8)	4.5e-08	0.86	9.3e-07	3.3e-08	2.4e-06	1	8.5e-05	4.3e-06
wlri_5	0.28 (0.13-0.42)	0.23 (0.13-0.33)	0.76 (0.36-1.2)	0.0023	0.99	0.002	0.0012	0.053	1	0.08	0.051
flri_1	0.36 (0.22-0.51)	0.28 (0.16-0.4)	0.55 (0.28-0.81)	0.025	0.24	0.071	0.0064	0.43	1	1	0.22
flri_2	0.36 (0.23-0.5)	0.33 (0.22-0.43)	0.95 (0.46-1.4)	0.01	1	0.0061	0.0038	0.2	1	0.21	0.14
flri_3	0.38 (0.21-0.55)	0.16 (0.09-0.23)	0.52 (0.13-0.92)	0.06	0.063	0.44	0.04	0.89	1	1	1
flri_4	0.3 (0.13-0.47)	0.15 (0.064-0.24)	0.43 (0.16-0.7)	0.021	0.18	0.091	0.0049	0.37	1	1	0.17
flri_5	0.19 (0.082-0.3)	0.14 (0.06-0.21)	0.19 (0-0.42)	0.83	0.55	0.91	0.8	1	1	1	1
slri_1	0.69 (0.5-0.89)	0.44 (0.29-0.58)	1 (0.49-1.5)	0.012	0.027	0.25	0.0091	0.23	0.73	1	0.29
slri_2	0.9 (0.62-1.2)	0.59 (0.43-0.75)	1.6 (1.1-2.2)	0.00079	0.22	0.0052	0.00012	0.02	1	0.18	0.0066
slri_3	0.73 (0.49-0.97)	0.37 (0.23-0.51)	1.5 (0.85-2.2)	0.00016	0.032	0.01	3.8e-05	0.0048	0.83	0.32	0.0024
slri_4	0.63 (0.32-0.94)	0.36 (0.21-0.52)	1.9 (1-2.8)	2.8e-07	0.56	5.9e-06	8.4e-08	1.3e-05	1	0.00045	1e-05
slri_5	0.36 (0.19-0.53)	0.27 (0.17-0.38)	0.76 (0.36-1.2)	0.015	0.88	0.012	0.005	0.28	1	0.37	0.18
rsv_uri_1	0.22 (0.13-0.3)	0.24 (0.15-0.33)	0.14 (0-0.34)	0.41	0.84	0.22	0.19	1	1	1	1
rsv_uri_2	0.11 (0.032-0.2)	0.25 (0.16-0.34)	0.14 (0-0.31)	0.033	0.01	0.51	0.35	0.54	0.32	1	1
rsv_uri_3	0.15 (0.068-0.24)	0.18 (0.089-0.27)	0.14 (0-0.36)	0.82	0.82	0.63	0.54	1	1	1	1
rsv_lri_1	0.28 (0.18-0.39)	0.12 (0.059-0.18)	0.36 (0.15-0.58)	0.0056	0.0071	0.43	0.0053	0.12	0.24	1	0.19
rsv_lri_2	0.15 (0.072-0.22)	0.16 (0.084-0.23)	0.24 (0.039-0.44)	0.57	0.95	0.32	0.33	1	1	1	1
rsv_lri_3	0.13 (0.049-0.21)	0.076 (0.018-0.13)	0.29 (0.075-0.5)	0.015	0.23	0.061	0.0031	0.28	1	1	0.12
rsv_wlri_1	0.057 (7.5E-03-0.11)	0.028 (0-0.06)	0.18 (6.8E-03-0.36)	0.016	0.32	0.058	0.004	0.29	1	1	0.15
rsv_wlri_2	0.091 (0.03-0.15)	0.13 (0.066-0.2)	0.048 (0-0.15)	0.44	0.38	0.52	0.28	1	1	1	1
rsv_wlri_3	0.047 (0-0.1)	0.029 (0-0.061)	0.24 (0.039-0.44)	0.00032	0.79	0.0021	0.00035	0.0087	1	0.084	0.017
rsv_flri_1	0.1 (0.038-0.17)	0.037 (8.5E-04-0.074)	0.18 (6.8E-03-0.36)	0.04	0.072	0.31	0.011	0.64	1	1	0.34
rsv_flri_2	0.08 (0.022-0.14)	0.093 (0.032-0.16)	0.24 (0.039-0.44)	0.075	0.9	0.039	0.043	1	1	0.98	1
rsv_flri_3	0.082 (0.023-0.14)	0.019 (0-0.046)	0.095 (0-0.23)	0.097	0.042	0.86	0.072	1	1	1	1
influ_uri_1	0.12 (0.048-0.2)	0.13 (0.066-0.2)	0.045 (0-0.14)	0.53	0.74	0.34	0.26	1	1	1	1
influ_uri_2	0.091 (0.03-0.15)	0.075 (0.024-0.13)	0.19 (0-0.42)	0.57	0.69	0.45	0.29	1	1	1	1
influ_uri_3	0.059 (7.8E-03-0.11)	0.038 (8.7E-04-0.075)	0.048 (0-0.15)	0.8	0.51	0.85	0.85	1	1	1	1
influ_lri_1	0.057 (0-0.12)	0.028 (0-0.06)	0.091 (0-0.22)	0.4	0.51	0.42	0.17	1	1	1	1
influ_lri_2	0.034 (0-0.073)	0.037 (8.5E-04-0.074)	0.095 (0-0.23)	0.43	0.91	0.24	0.26	1	1	1	1
influ_lri_3	0.035 (0-0.075)	9.5E-03 (0-0.028)	0.048 (0-0.15)	0.38	0.22	0.8	0.21	1	1	1	1
influ_wlri_1	0.023 (0-0.054)	0 (0-0)	0.045 (0-0.14)	0.16	0.12	0.57	0.029	1	1	1	0.77
influ_wlri_2	0.034 (0-0.073)	0 (0-0)	0.048 (0-0.15)	0.13	0.056	0.78	0.025	1	1	1	0.69
influ_wlri_3	0.024 (0-0.056)	9.5E-03 (0-0.028)	0.048 (0-0.15)	0.47	0.45	0.56	0.21	1	1	1	1
influ_flri_1	0.034 (0-0.073)	0.019 (0-0.045)	0.045 (0-0.14)	0.7	0.5	0.81	0.46	1	1	1	1
influ_flri_2	0.011 (0-0.034)	0.019 (0-0.045)	0.095 (0-0.23)	0.066	0.68	0.037	0.068	0.97	1	0.94	1
influ_flri_3	0.035 (0-0.075)	9.5E-03 (0-0.028)	0 (0-0)	0.35	0.22	0.39	0.67	1	1	1	1
hrva_uri_1	0 (0-0)	0 (0-0)	0 (0-0)	NA	NA	NA	NA	NA	NA	NA	NA
hrva_uri_2	0 (0-0)	0 (0-0)	0 (0-0)	NA	NA	NA	NA	NA	NA	NA	NA
hrva_uri_3	0 (0-0)	0 (0-0)	0 (0-0)	NA	NA	NA	NA	NA	NA	NA	NA
hrva_lri_1	0.55 (0.33-0.76)	0.36 (0.24-0.49)	0.73 (0.27-1.2)	0.22	0.37	0.29	0.089	1	1	1	1
hrva_lri_2	0.32 (0.2-0.44)	0.23 (0.14-0.33)	0.38 (0.11-0.65)	0.29	0.23	0.58	0.18	1	1	1	1
hrva_lri_3	0.27 (0.14-0.41)	0.095 (0.032-0.16)	0.29 (0.031-0.54)	0.048	0.031	0.68	0.042	0.74	0.81	1	1
hrva_wlri_1	0.14 (0.063-0.21)	0.15 (0.071-0.23)	0.23 (0-0.46)	0.79	0.95	0.54	0.51	1	1	1	1
hrva_wlri_2	0.17 (0.09-0.25)	0.084 (0.025-0.14)	0.19 (0-0.42)	0.13	0.043	0.83	0.3	1	1	1	1
hrva_wlri_3	0.14 (0.052-0.23)	0.057 (0.012-0.1)	0.24 (0-0.48)	0.098	0.13	0.38	0.037	1	1	1	0.94
hrva_flri_1	0.12 (0.048-0.2)	0.1 (0.044-0.16)	0.14 (0-0.34)	0.95	0.79	0.81	0.92	1	1	1	1
hrva_flri_2	0.068 (5.6E-03-0.13)	0.047 (6.1E-03-0.087)	0.14 (0-0.31)	0.24	0.74	0.19	0.099	1	1	1	1
hrva_flri_3	0.071 (5.8E-03-0.14)	0.038 (8.7E-04-0.075)	0.095 (0-0.29)	0.79	0.5	0.88	0.82	1	1	1	1
hrvb_uri_1	0 (0-0)	0 (0-0)	0 (0-0)	NA	NA	NA	NA	NA	NA	NA	NA
hrvb_uri_2	0 (0-0)	0 (0-0)	0 (0-0)	NA	NA	NA	NA	NA	NA	NA	NA
hrvb_uri_3	0 (0-0)	0 (0-0)	0 (0-0)	NA	NA	NA	NA	NA	NA	NA	NA
hrvb_lri_1	0.068 (0.014-0.12)	0.019 (0-0.045)	0.091 (0-0.22)	0.15	0.084	0.72	0.078	1	1	1	1
hrvb_lri_2	0.011 (0-0.034)	0 (0-0)	0.048 (0-0.15)	0.11	0.27	0.28	0.025	1	1	1	0.69
hrvb_lri_3	0.024 (0-0.056)	0 (0-0)	0.095 (0-0.23)	0.013	0.12	0.13	0.0016	0.25	1	1	0.066
hrvb_wlri_1	0.011 (0-0.034)	0 (0-0)	0.045 (0-0.14)	0.12	0.27	0.29	0.029	1	1	1	0.77
hrvb_wlri_2	0 (0-0)	0 (0-0)	0 (0-0)	NA	NA	NA	NA	NA	NA	NA	NA
hrvb_wlri_3	0.012 (0-0.035)	0 (0-0)	0.048 (0-0.15)	0.12	0.27	0.29	0.027	1	1	1	0.73
hrvb_flri_1	0.034 (0-0.073)	0 (0-0)	0.045 (0-0.14)	0.13	0.056	0.81	0.029	1	1	1	0.77
hrvb_flri_2	0.011 (0-0.034)	0 (0-0)	0.048 (0-0.15)	0.11	0.27	0.28	0.025	1	1	1	0.69
hrvb_flri_3	0.012 (0-0.035)	0 (0-0)	0.048 (0-0.15)	0.12	0.27	0.29	0.027	1	1	1	0.73
hrvc_uri_1	0 (0-0)	0 (0-0)	0 (0-0)	NA	NA	NA	NA	NA	NA	NA	NA
hrvc_uri_2	0 (0-0)	0 (0-0)	0 (0-0)	NA	NA	NA	NA	NA	NA	NA	NA
hrvc_uri_3	0 (0-0)	0 (0-0)	0 (0-0)	NA	NA	NA	NA	NA	NA	NA	NA
hrvc_lri_1	0.51 (0.35-0.67)	0.29 (0.18-0.4)	0.59 (0.14-1)	0.068	0.027	0.99	0.17	1	0.73	1	1
hrvc_lri_2	0.35 (0.19-0.51)	0.23 (0.14-0.33)	0.67 (0.3-1)	0.021	0.63	0.027	0.0051	0.37	1	0.73	0.18
hrvc_lri_3	0.25 (0.13-0.37)	0.14 (0.07-0.22)	0.57 (0.2-0.94)	0.014	0.26	0.046	0.0033	0.26	1	1	0.13
hrvc_wlri_1	0.15 (0.06-0.24)	0.075 (0.024-0.13)	0.23 (0-0.46)	0.23	0.23	0.48	0.11	1	1	1	1
hrvc_wlri_2	0.14 (0.044-0.23)	0.084 (0.014-0.15)	0.38 (0.076-0.69)	0.009	0.34	0.03	0.0021	0.18	1	0.79	0.084
hrvc_wlri_3	0.16 (0.06-0.27)	0.067 (0.011-0.12)	0.48 (0.13-0.82)	0.00084	0.13	0.016	0.00012	0.021	1	0.47	0.0066
hrvc_flri_1	0.091 (0.03-0.15)	0.075 (0.018-0.13)	0.091 (0-0.22)	0.8	0.52	1	0.69	1	1	1	1
hrvc_flri_2	0.057 (0-0.12)	0.047 (6.1E-03-0.087)	0.048 (0-0.15)	1	0.98	0.98	0.99	1	1	1	1
hrvc_flri_3	0.047 (1.1E-03-0.093)	0.029 (0-0.061)	0.14 (0-0.31)	0.08	0.5	0.12	0.026	1	1	1	0.71
riskMPGs_0_2_quart	2.4 (2-2.7)	1.8 (1.6-2.1)	2.7 (2.1-3.2)	0.0037	0.015	0.29	0.0026	0.081	0.45	1	0.1
riskMPGs_2_4_quart	2.2 (1.9-2.5)	2.2 (1.9-2.4)	2.2 (1.7-2.7)	0.99	0.99	0.89	0.87	1	1	1	1
healthMPGs_0_2_quart	2.1 (1.9-2.4)	2.5 (2.2-2.7)	2.1 (1.5-2.6)	0.15	0.087	0.83	0.18	1	1	1	1
healthMPGs_2_4_quart	2.3 (2-2.5)	2 (1.8-2.3)	1.9 (1.3-2.4)	0.3	0.2	0.21	0.65	1	1	1	1
wlri_1.ari_1	11% (7%-16%)	7.1% (4.1%-10%)	16% (3.1%-30%)	0.16	0.092	0.76	0.16	1	1	1	1
wlri_2.ari_2	15% (10%-19%)	12% (7.8%-17%)	24% (13%-35%)	0.015	0.11	0.07	0.0055	0.28	1	1	0.19
wlri_3.ari_3	16% (10%-23%)	10% (5.9%-15%)	35% (19%-50%)	0.00032	0.082	0.0072	6.1e-05	0.0087	1	0.24	0.0036
wlri_4.ari_4	14% (7.8%-21%)	13% (7.5%-19%)	59% (40%-77%)	1e-07	0.98	5.2e-07	1.8e-07	5.1e-06	1	5e-05	1.9e-05
wlri_5.ari_5	13% (6.2%-20%)	13% (6.7%-20%)	56% (33%-79%)	0.00024	0.92	0.00021	0.00018	0.0068	1	0.011	0.0096
flri_1.ari_1	7.3% (4.5%-10%)	7.3% (4%-11%)	15% (7.6%-22%)	0.025	0.43	0.028	0.0088	0.43	1	0.75	0.29
flri_2.ari_2	7.9% (4.7%-11%)	11% (6.9%-15%)	28% (12%-44%)	0.014	0.69	0.0043	0.01	0.26	1	0.16	0.32
flri_3.ari_3	11% (6.1%-16%)	5% (2.1%-8%)	13% (2.9%-24%)	0.066	0.05	0.6	0.058	0.97	1	1	1
flri_4.ari_4	7.9% (4%-12%)	8.1% (2.8%-13%)	17% (4%-30%)	0.046	0.26	0.11	0.013	0.71	1	1	0.4
flri_5.ari_5	11% (4.4%-17%)	7% (2.3%-12%)	7.8% (0%-17%)	0.68	0.38	0.74	0.86	1	1	1	1
slri_1.ari_1	16% (11%-21%)	12% (8%-16%)	26% (12%-40%)	0.041	0.091	0.2	0.021	0.65	1	1	0.59
slri_2.ari_2	19% (14%-24%)	18% (13%-24%)	42% (27%-58%)	0.0023	0.56	0.0018	0.00079	0.053	1	0.074	0.035
slri_3.ari_3	21% (14%-27%)	13% (7.7%-17%)	36% (21%-51%)	0.001	0.044	0.031	0.0003	0.025	1	0.81	0.015
slri_4.ari_4	17% (10%-24%)	15% (8.7%-21%)	59% (41%-78%)	7.8e-07	0.67	4e-06	5.6e-07	3.4e-05	1	0.00032	5.3e-05
slri_5.ari_5	17% (9.4%-25%)	16% (8.8%-23%)	56% (33%-79%)	0.0015	0.74	0.0011	0.00071	0.036	1	0.047	0.032
wlri_1.lri_1	33% (23%-44%)	28% (17%-38%)	31% (11%-52%)	0.54	0.27	0.82	0.63	1	1	1	1
wlri_2.lri_2	54% (42%-66%)	39% (28%-50%)	42% (24%-59%)	0.16	0.068	0.25	0.57	1	1	1	1
wlri_3.lri_3	52% (39%-66%)	52% (38%-67%)	80% (62%-98%)	0.099	0.95	0.035	0.059	1	1	0.9	1
wlri_4.lri_4	49% (33%-65%)	65% (49%-82%)	94% (86%-100%)	0.0011	0.08	0.00021	0.026	0.027	1	0.011	0.71
wlri_5.lri_5	62% (42%-82%)	66% (48%-84%)	88% (68%-100%)	0.28	0.75	0.11	0.19	1	1	1	1
flri_1.lri_1	24% (15%-33%)	25% (15%-35%)	39% (19%-58%)	0.21	0.81	0.11	0.11	1	1	1	1
flri_2.lri_2	30% (20%-41%)	36% (26%-47%)	43% (23%-62%)	0.54	0.74	0.23	0.43	1	1	1	1
flri_3.lri_3	36% (23%-48%)	32% (18%-45%)	28% (8.2%-48%)	0.77	0.55	0.56	0.92	1	1	1	1
flri_4.lri_4	31% (18%-45%)	33% (17%-50%)	27% (7.4%-47%)	0.89	0.76	0.61	0.98	1	1	1	1
flri_5.lri_5	45% (26%-65%)	34% (17%-51%)	18% (0%-40%)	0.2	0.37	0.08	0.28	1	1	1	1
slri_1.lri_1	50% (39%-61%)	42% (30%-53%)	62% (39%-85%)	0.17	0.23	0.32	0.085	1	1	1	1
slri_2.lri_2	68% (58%-79%)	60% (49%-71%)	71% (53%-88%)	0.67	0.42	0.89	0.55	1	1	1	1
slri_3.lri_3	67% (55%-80%)	65% (51%-78%)	85% (68%-100%)	0.28	0.93	0.13	0.14	1	1	1	1
slri_4.lri_4	61% (45%-77%)	74% (58%-90%)	97% (91%-100%)	0.0036	0.094	0.00088	0.057	0.08	1	0.038	1
slri_5.lri_5	82% (66%-98%)	77% (61%-92%)	88% (68%-100%)	0.67	0.57	0.75	0.42	1	1	1	1
riskMPGs_0_2	49% (38%-59%)	32% (24%-39%)	62% (47%-76%)	0.0012	0.013	0.2	0.00055	0.029	0.4	1	0.025
riskMPGs_2_4	46% (37%-55%)	44% (37%-51%)	45% (29%-61%)	0.9	0.67	0.92	0.8	1	1	1	1
healthMPGs_0_2	35% (25%-44%)	46% (38%-55%)	29% (13%-46%)	0.077	0.064	0.61	0.08	1	1	1	1
healthMPGs_2_4	33% (26%-41%)	28% (21%-35%)	23% (9.6%-36%)	0.34	0.24	0.23	0.66	1	1	1	1
strep_raw_6m	3.7% (2.7%-5.3%)	6.3% (4.9%-8.1%)	4.2% (1.9%-9.6%)	0.069	0.02	0.37	0.68	1	0.57	1	1
strep_raw_7w	1.2% (0.59%-2.5%)	0.64% (0.27%-1.5%)	3.8% (0.47%-31%)	0.1	0.16	0.25	0.065	1	1	1	1
strep_cn_6m	3.5% (2.5%-5%)	5.9% (4.6%-7.6%)	3.9% (1.7%-9%)	0.083	0.025	0.37	0.7	1	0.69	1	1
strep_cn_7w	1.2% (0.56%-2.5%)	0.63% (0.26%-1.5%)	3.9% (0.47%-33%)	0.11	0.2	0.21	0.057	1	1	1	1
strep_raw_6m_20	7.6% (1.6%-14%)	18% (10%-26%)	14% (0%-31%)	0.12	0.045	0.39	1	1	1	1	1
strep_raw_7w_20	11% (0.34%-23%)	15% (3.3%-26%)	44% (3.9%-85%)	0.081	0.75	0.042	0.065	1	1	1	1
strep_cn_6m_20	7.6% (1.6%-14%)	17% (9.4%-25%)	14% (0%-31%)	0.17	0.069	0.39	1	1	1	1	1
strep_cn_7w_20	11% (0.34%-23%)	15% (3.3%-26%)	44% (3.9%-85%)	0.081	0.75	0.042	0.065	1	1	1	1

## Sheet: key
variable	definition
sex	gender or sex
mat_atopy	derived maternal history of atopy defined by skin prick test
mat_had	derived maternal history of atopic disease dr diagnosed
mat_ast	derived maternal history of asthma dr diagnosed
matfh_xast	derived maternal history of allergic disease excluding asthma
pat_atopy	derived paternal history of atopy defined by skin prick test
pat_had	derived paternal history of atopic disease dr diagnosed
pat_ast	derived paternal history of asthma dr diagnosed
patfh_xast	derived paternal history of allergic disease excluding asthma
crwz1	Parent opinion on whether the child had wheezed in the last 12 months at the 12 month questionnaire
crwz2	Parent opinion on whether the child had wheezed in the last 12 months at the 2 year questionnaire.
crwz3	Parent opinion on whether the child had wheezed in the last 12 months at the 3 year questionnaire.
crwz4	Parent opinion on whether the child had wheezed in the last 12 months at the 4 year questionnaire.
crwz5	Parent opinion on whether the child had wheezed in the last 12 months at the 5 year questionnaire.
crwz10	Parent opinion on whether the child had wheezed in the last 12 months at the 10 year questionnaire.
cras_3	Current asthma at 3 years defined as positive for wheeze in last 12 months and Dr diagnosed with asthma at or beyond 2nd birthday
cras_4	Current asthma at 4 years defined as positive for wheeze in last 12 months and Dr diagnosed with asthma at or beyond 2nd birthday
cras_5	Current asthma at 5 years defined as positive for wheeze in last 12 months and Dr diagnosed with asthma at or beyond 2nd birthday
cras_10	Current asthma at 10 years defined as positive for wheeze in last 12 months and Dr diagnosed with asthma at or beyond 2nd birthday
arc5	Allergic rhinitis/conjunctivitis/rhinoconjunctivitis in the last 5 years?
crez6m	Dr diagnosis of eczema or atopic dermatitis experienced by the child in the last 6 months at the 6 mo visit.
crez1	Dr diagnosis of eczema or atopic dermatitis experienced by the child in the last 12 months at the 12 month visit.
crez2	Dr diagnosis of eczema or atopic dermatitis experienced by the child in the last 12 months at the 2 year visit.
crez3	Dr diagnosis of eczema or atopic dermatitis experienced by the child in the last 12 months at the 3 year visit.
crez4	Dr diagnosis of eczema or atopic dermatitis experienced by the child in the last 12 months at the 4 year visit.
crez5	Dr diagnosis of eczema or atopic dermatitis experienced by the child in the last 12 months at the 5 year visit.
smoke1	Child exposed to cigarette smoke in last 12 mo at 1 year.
smoke2	Child exposed to cigarette smoke in last 12 mo at 2 years.
smoke3	Child exposed to cigarette smoke in last 12 mo at 3 years.
smoke4	Child exposed to cigarette smoke in last 12 mo at 4 years.
smoke5	Child exposed to cigarette smoke in last 12 mo at 5 years.
smoke10	Child exposed to cigarette smoke in last 12 mo at 10 years.
care1	Attended childcare in last 12 months at 1 year.
care2	Attended childcare in last 12 months at 2 year.
care3	Attended childcare in last 12 months at 3 year.
care4	Attended childcare in last 12 months at 4 year.
crcatexp1	Child exposed to cat in the house, childcare or playgroup in last 12 mo at 1 year.
crcatexp2	Child exposed to cat in the house, childcare or playgroup in last 12 mo at 2 years.
crcatexp3	Child exposed to cat in the house, childcare or playgroup in last 12 mo at 3 years.
crcatexp4	Child exposed to cat in the house, childcare or playgroup in last 12 mo at 4 years.
crcatexp5	Child exposed to cat in the house, childcare or playgroup in last 12 mo at 5 years.
crcatexp10	Child exposed to cat in the house, childcare or playgroup in last 12 mo at 10 years.
crdogexp10	Child exposed to dog in the house, childcare or playgroup in last 12 mo at 10 years.
crfurpet10	Child exposed to furred pet in the house, childcare or playgroup in last 12 mo at 10 years.
ht3	height in cm at 3 years
ht4	height in cm at 4 years
ht5	height in cm at 5 years
ht10	height in m at 10 years
wt3	weight in kg at 3 years
wt4	weight in kg at 4 years
wt5	weight in kg at 5 years
wt10	weight in kg at 10 years
bmi3	Body Mass Index at 3 years
bmi4	Body Mass Index at 4 years
bmi5	Body Mass Index at 5 years
bmi10	Body Mass Index at 10 years
nochdn1	Number of children under 16 yrs of age living in the home at 1 yr.
nochdn2	Number of children under 16 yrs of age living in the home at 2 yrs.
nochdn3	Number of children under 16 yrs of age living in the home at 3 yrs.
nochdn4	Number of children under 16 yrs of age living in the home at 4 yrs.
nochdn5	Number of children under 16 yrs of age living in the home at 5 yrs.
nochdn10	Number of children under 16 yrs of age living in the home at 10 yrs.
oldchdbirth	Number of children older than the proband living in the house at birth
oldchd1	Number of children older than the proband living in the house at age 1 year
oldchd2	Number of children older than the proband living in the house at age 2 yrs
oldchd3	Number of children older than the proband living in the house at age 3 yrs
oldchd4	Number of children older than the proband living in the house at age 4 yrs
oldchd5	Number of children older than the proband living in the house at age 5 yrs
oldchd10	Number of children older than the proband living in the house at age 10 yrs
vitdmat	25-Hydroxy Vitamin D (nmol/L) in mothers’s serum at 6 weeks postpartum
vitd3_cd	25-Hydroxy Vitamin D (nmol/L) in cord serum
vitd3_6m	25-Hydroxy Vitamin D (nmol/L) in serum at 6 months of age
vitd3_1	25-Hydroxy Vitamin D (nmol/L) in serum at 1 year of age
vitd3_2	25-Hydroxy Vitamin D (nmol/L) in serum at 2 yrs of age
vitd3_3	25-Hydroxy Vitamin D (nmol/L) in serum at 3 yrs of age
vitd3_4	25-Hydroxy Vitamin D (nmol/L) in serum at 4 yrs of age
vitd3_5	25-Hydroxy Vitamin D (nmol/L) in serum at 5 yrs of age
vitd3_10	25-Hydroxy Vitamin D (nmol/L) in serum at 6 yrs of age
ds_vitd3_cd	25-Hydroxy Vitamin D (nmol/L) in cord serum (deseasonalised)
ds_vitd3_6m	25-Hydroxy Vitamin D (nmol/L) in serum at 6 months of age (deseasonalised)
ds_vitd3_1	25-Hydroxy Vitamin D (nmol/L) in serum at 1 year of age (deseasonalised)
ds_vitd3_2	25-Hydroxy Vitamin D (nmol/L) in serum at 2 yrs of age (deseasonalised)
ds_vitd3_3	25-Hydroxy Vitamin D (nmol/L) in serum at 3 yrs of age (deseasonalised)
ds_vitd3_4	25-Hydroxy Vitamin D (nmol/L) in serum at 4 yrs of age (deseasonalised)
ds_vitd3_5	25-Hydroxy Vitamin D (nmol/L) in serum at 5 yrs of age (deseasonalised)
ds_vitd3_10	25-Hydroxy Vitamin D (nmol/L) in serum at 6 yrs of age (deseasonalised)
totige6m	Total IgE at 6 months. Continuous kU/L.
totige1	Total IgE at 1 year. Continuous kU/L.
totige2	Total IgE at 2 years. Continuous kU/L.
totige3	Total IgE at 3 years. Continuous kU/L.
totige4	Total IgE at 4 years. Continuous kU/L.
totige5	Total IgE at 5 years. Continuous kU/L.
totige10	Total IgE at 10 years. Continuous kU/L.
hdmige6m	IgE to HDM at 6 months. Continuous kU/L
hdmige1	IgE to HDM at 1 year. Continuous kU/L
hdmige2	IgE to HDM at 2 years. Continuous kU/L
hdmige3	IgE to HDM at 3 years. Continuous kU/L
hdmige4	IgE to HDM at 4 years. Continuous kU/L
hdmige5	IgE to HDM at 5 years. Continuous kU/L
hdmige10	IgE to HDM at 10 years. Continuous kU/L
hdmigg_1	IgG to Der p1 at 1 year. Continuous mg/L
hdmigg_2	IgG to Der p1 at 2 years. Continuous mg/L
hdmigg_3	IgG to Der p1 at 3 years. Continuous mg/L
hdmigg_5	IgG to Der p1 at 5 years. Continuous mg/L
hdmigg_10	IgG to Der p1 at 10 years. Continuous mg/L
hdmg4_6m	IgG4 to HDM at 6 months. Continuous µg/L
hdmg4_1	IgG4 to HDM at 1 year. Continuous µg/L
hdmg4_2	IgG4 to HDM at 2 years. Continuous µg/L
hdmg4_3	IgG4 to HDM at 3 years. Continuous µg/L
hdmg4_4	IgG4 to HDM at 4 years. Continuous µg/L
hdmg4_5	IgG4 to HDM at 5 years. Continuous µg/L
hdmigg_non_g4_1	IgG to HDM minus IgG4 to HDM at 1 year. Continuous mg/L
hdmigg_non_g4_2	IgG to HDM minus IgG4 to HDM at 2 years. Continuous mg/L
hdmigg_non_g4_3	IgG to HDM minus IgG4 to HDM at 3 years. Continuous mg/L
hdmigg_non_g4_5	IgG to HDM minus IgG4 to HDM at 5 years. Continuous mg/L
hdmigg_ige_1	HDM IgG:IgE ratio at 1 year
hdmigg_ige_2	HDM IgG:IgE ratio at 2 years
hdmigg_ige_3	HDM IgG:IgE ratio at 3 years
hdmigg_ige_5	HDM IgG:IgE ratio at 5 years
hdmigg_ige_10	HDM IgG:IgE ratio at 10 years
hdmg4_ige_6m	HDM IgG4:IgE ratio at 6 months
hdmg4_ige_1	HDM IgG4:IgE ratio at 1 year
hdmg4_ige_2	HDM IgG4:IgE ratio at 2 years
hdmg4_ige_3	HDM IgG4:IgE ratio at 3 years
hdmg4_ige_4	HDM IgG4:IgE ratio at 4 years
hdmg4_ige_5	HDM IgG4:IgE ratio at 5 years
catige6m	IgE to cat epithelium and dander at 6 months. Continuous kU/L
catige1	IgE to cat epithelium and dander at 1 year. Continuous kU/L
catige2	IgE to cat epithelium and dander at 2 years. Continuous kU/L
catige3	IgE to cat epithelium and dander at 3 years. Continuous kU/L
catige4	IgE to cat epithelium and dander at 4 years. Continuous kU/L
catige5	IgE to cat epithelium and dander at 5 years. Continuous kU/L
catige10	IgE to cat epithelium and dander at 10 years. Continuous kU/L
catigg_1	IgG to rfel d1 at 1 year. Continuous mg/L
catigg_2	IgG to rfel d1 at 2 years. Continuous mg/L
catigg_3	IgG to rfel d1 at 3 years. Continuous mg/L
catigg_5	IgG to rfel d1 at 5 years. Continuous mg/L
catigg_10	IgG to rfel d1 at 10 years. Continuous mg/L
catg4_6m	IgG4 to cat at 6 months. Continuous µg/L
catg4_1	IgG4 to cat at 1 year. Continuous µg/L
catg4_2	IgG4 to cat at 2 years. Continuous µg/L
catg4_3	IgG4 to cat at 3 years. Continuous µg/L
catg4_4	IgG4 to cat at 4 years. Continuous µg/L
catg4_5	IgG4 to cat at 5 years. Continuous µg/L
catigg_non_g4_1	IgG to cat minus IgG4 to cat at 1 year. Continuous mg/L
catigg_non_g4_2	IgG to cat minus IgG4 to cat at 2 years. Continuous mg/L
catigg_non_g4_3	IgG to cat minus IgG4 to cat at 3 years. Continuous mg/L
catigg_non_g4_5	IgG to cat minus IgG4 to cat at 5 years. Continuous mg/L
catigg_ige_1	cat IgG:IgE ratio at 1 year
catigg_ige_2	cat IgG:IgE ratio at 2 years
catigg_ige_3	cat IgG:IgE ratio at 3 years
catigg_ige_5	cat IgG:IgE ratio at 5 years
catigg_ige_10	cat IgG:IgE ratio at 10 years
catg4_ige_6m	cat IgG4:IgE ratio at 6 months
catg4_ige_1	cat IgG4:IgE ratio at 1 year
catg4_ige_2	cat IgG4:IgE ratio at 2 years
catg4_ige_3	cat IgG4:IgE ratio at 3 years
catg4_ige_4	cat IgG4:IgE ratio at 4 years
catg4_ige_5	cat IgG4:IgE ratio at 5 years
pntige6m	IgE to peanut at 6 months. Continuous kU/L
pntige1	IgE to peanut at 1 year. Continuous kU/L
pntige2	IgE to peanut at 2 years. Continuous kU/L
pntige3	IgE to peanut at 3 years. Continuous kU/L
pntige4	IgE to peanut at 4 years. Continuous kU/L
pntige5	IgE to peanut at 5 years. Continuous kU/L
pntige10	IgE to peanut at 10 years. Continuous kU/L
pntg4_6m	IgG4 to peanut at 6 months. Continuous µg/L
pntg4_1	IgG4 to peanut at 1 year. Continuous µg/L
pntg4_2	IgG4 to peanut at 2 years. Continuous µg/L
pntg4_3	IgG4 to peanut at 3 years. Continuous µg/L
pntg4_4	IgG4 to peanut at 4 years. Continuous µg/L
pntg4_5	IgG4 to peanut at 5 years. Continuous µg/L
pntg4_ige_6m	peanut IgG4:IgE ratio at 6 months
pntg4_ige_1	peanut IgG4:IgE ratio at 1 year
pntg4_ige_2	peanut IgG4:IgE ratio at 2 years
pntg4_ige_3	peanut IgG4:IgE ratio at 3 years
pntg4_ige_4	peanut IgG4:IgE ratio at 4 years
pntg4_ige_5	peanut IgG4:IgE ratio at 5 years
couige6m	IgE to couch grass at 6 months. Continuous kU/L
couige1	IgE to couch grass at 1 year. Continuous kU/L
couige2	IgE to couch grass at 2 years. Continuous kU/L
couige3	IgE to couch grass at 3 years. Continuous kU/L
couige4	IgE to couch grass at 4 years. Continuous kU/L
couige5	IgE to couch grass at 5 years. Continuous kU/L
couige10	IgE to couch grass at 10 years. Continuous kU/L
coug4_6m	IgG4 to couch grass at 6 months. Continuous µg/L
coug4_1	IgG4 to couch grass at 1 year. Continuous µg/L
coug4_2	IgG4 to couch grass at 2 years. Continuous µg/L
coug4_3	IgG4 to couch grass at 3 years. Continuous µg/L
coug4_4	IgG4 to couch grass at 4 years. Continuous µg/L
coug4_5	IgG4 to couch grass at 5 years. Continuous µg/L
coug4_ige_6m	couch grass IgG4:IgE ratio at 6 months
coug4_ige_1	couch grass IgG4:IgE ratio at 1 year
coug4_ige_2	couch grass IgG4:IgE ratio at 2 years
coug4_ige_3	couch grass IgG4:IgE ratio at 3 years
coug4_ige_4	couch grass IgG4:IgE ratio at 4 years
coug4_ige_5	couch grass IgG4:IgE ratio at 5 years
ryeige6m	IgE to ryegrass at 6 months. Continuous kU/L
ryeige1	IgE to ryegrass at 1 year. Continuous kU/L
ryeige3	IgE to ryegrass at 3 years. Continuous kU/L
ryeige4	IgE to ryegrass at 4 years. Continuous kU/L
ryeige5	IgE to ryegrass at 5 years. Continuous kU/L
ryeige10	IgE to ryegrass at 10 years. Continuous kU/L
ryeg4_6m	IgG4 to ryegrass at 6 months. Continuous µg/L
ryeg4_1	IgG4 to ryegrass at 1 year. Continuous µg/L
ryeg4_2	IgG4 to ryegrass at 2 years. Continuous µg/L
ryeg4_3	IgG4 to ryegrass at 3 years. Continuous µg/L
ryeg4_4	IgG4 to ryegrass at 4 years. Continuous µg/L
ryeg4_5	IgG4 to ryegrass at 5 years. Continuous µg/L
ryeg4_ige_6m	ryegrass IgG4:IgE ratio at 6 months
ryeg4_ige_1	ryegrass IgG4:IgE ratio at 1 year
ryeg4_ige_3	ryegrass IgG4:IgE ratio at 3 years
ryeg4_ige_4	ryegrass IgG4:IgE ratio at 4 years
ryeg4_ige_5	ryegrass IgG4:IgE ratio at 5 years
grassigg_1	IgG to rPhl p1 at 1 year.
grassigg_2	IgG to rPhl p1 at 2 years.
grassigg_3	IgG to rPhl p1 at 3 years.
grassigg_5	IgG to rPhl p1 at 5 years.
grassigg_10	IgG to rPhl p1 at 10 years.
mouige6m	IgE to mould mix at 6 months. Continuous kU/L
mouige1	IgE to mould mix at 1 year. Continuous kU/L
mouige2	IgE to mould mix at 2 years. Continuous kU/L
mouige3	IgE to mould mix at 3 years. Continuous kU/L
mouige4	IgE to mould mix at 4 years. Continuous kU/L
mouige5	IgE to mould mix at 5 years. Continuous kU/L
mouige10	IgE to mould mix at 10 years. Continuous kU/L
moug4_6m	IgG4 to mould mix at 6 months. Continuous µg/L
moug4_1	IgG4 to mould mix at 1 year. Continuous µg/L
moug4_2	IgG4 to mould mix at 2 years. Continuous µg/L
moug4_3	IgG4 to mould mix at 3 years. Continuous µg/L
moug4_4	IgG4 to mould mix at 4 years. Continuous µg/L
moug4_5	IgG4 to mould mix at 5 years. Continuous µg/L
moug4_ige_6m	mould mix IgG4:IgE ratio at 6 months
moug4_ige_1	mould mix IgG4:IgE ratio at 1 year
moug4_ige_2	mould mix IgG4:IgE ratio at 2 years
moug4_ige_3	mould mix IgG4:IgE ratio at 3 years
moug4_ige_4	mould mix IgG4:IgE ratio at 4 years
moug4_ige_5	mould mix IgG4:IgE ratio at 5 years
fmxige5	IgE to food mix (egg white, milk, fish, wheat, peanut and soybean) at 5 years. Continuous kU/L
fmxg4_5	IgG4 to food mix (egg white, milk, fish, wheat, peanut and soybean) at 5 years. Continuous µg/L
phinfige6m	Infant Phadiatop IgE at 6 months. Continuous PAU/L
phinfige1	Infant Phadiatop IgE at 1 year. Continuous PAU/L
phinfige2	Infant Phadiatop IgE at 2 years. Continuous PAU/L
phinfige3	Infant Phadiatop IgE at 3 years. Continuous PAU/L
phinfige4	Infant Phadiatop IgE at 4 years. Continuous PAU/L
phadige5	Phadiatop IgE at 5 years. Continuous PAU/L
phige10	Phadiatop IgE at 10 years. Continuous PAU/L
phinfg4_6m	Infant Phadiatop IgG4 at 6 months. Continuous PAU/L
phinfg4_1	Infant Phadiatop IgG4 at 1 year. Continuous PAU/L
phinfg4_2	Infant Phadiatop IgG4 at 2 years. Continuous PAU/L
phinfg4_3	Infant Phadiatop IgG4 at 3 years. Continuous PAU/L
phinfg4_4	Infant Phadiatop IgG4 at 4 years. Continuous PAU/L
phadg4_5	Phadiatop IgG4 at 5 years. Continuous PAU/L
phinfg4_ige_6m	Phadiatop IgG4:IgE ratio at 6 months
phinfg4_ige_1	Phadiatop IgG4:IgE ratio at 1 year
phinfg4_ige_2	Phadiatop IgG4:IgE ratio at 2 years
phinfg4_ige_3	Phadiatop IgG4:IgE ratio at 3 years
phinfg4_ige_4	Phadiatop IgG4:IgE ratio at 4 years
phinfg4_ige_5	Phadiatop IgG4:IgE ratio at 5 years
mhdm13_cd	IL-13 to house dust mite in CBMC from cord blood, mRNA expression above unstimulated control, ≤0 have been converted to 0.000001
mhdm13_6m	IL-13 to house dust mite at 6 months: mRNA expression above unstimulated control, ≤0 have been converted to 0.000001
mhdm13_1	IL-13 to house dust mite at 1 year: mRNA expression above unstimulated control, ≤0 have been converted to 0.000001
mhdm13_2	IL-13 to house dust mite at 2 years: mRNA expression above unstimulated control, ≤0 have been converted to 0.000001
mhdm13_3	IL-13 to house dust mite at 3 years: mRNA expression above unstimulated control, ≤0 have been converted to 0.000001
mhdm13_5	IL-13 to house dust mite at 5 years: mRNA expression above unstimulated control, ≤0 have been converted to 0.000001
mhdm4_cd	IL-4 to house dust mite in CBMC from cord blood, mRNA expression above unstimulated control, ≤0 have been converted to 0.000001
mhdm4_6m	IL-4 to house dust mite at 6 months: mRNA expression above unstimulated control, ≤0 have been converted to 0.000001
mhdm4_1	IL-4 to house dust mite at 1 year: mRNA expression above unstimulated control, ≤0 have been converted to 0.000001
mhdm4_2	IL-4 to house dust mite at 2 years: mRNA expression above unstimulated control, ≤0 have been converted to 0.000001
mhdm4_3	IL-4 to house dust mite at 3 years: mRNA expression above unstimulated control, ≤0 have been converted to 0.000001
mhdm4_5	IL-4 to house dust mite at 5 years: mRNA expression above unstimulated control, ≤0 have been converted to 0.000001
mhdm4r_6m	IL-4 receptor to house dust mite at 6 months: mRNA expression above unstimulated control, ≤0 have been converted to 0.000001
mhdm4r_1	IL-4 receptor to house dust mite at 1 year: mRNA expression above unstimulated control, ≤0 have been converted to 0.000001
mhdm4r_2	IL-4 receptor to house dust mite at 2 years: mRNA expression above unstimulated control, ≤0 have been converted to 0.000001
mhdm4r_3	IL-4 receptor to house dust mite at 3 years: mRNA expression above unstimulated control, ≤0 have been converted to 0.000001
mhdm4r_5	IL-4 receptor to house dust mite at 5 years: mRNA expression above unstimulated control, ≤0 have been converted to 0.000001
mhdm5_cd	IL-5 to house dust mite in CBMC from cord blood, mRNA expression above unstimulated control, ≤0 have been converted to 0.000001
mhdm5_6m	IL-5 to house dust mite at 6 months: mRNA expression above unstimulated control, ≤0 have been converted to 0.000001
mhdm5_1	IL-5 to house dust mite at 1 year: mRNA expression above unstimulated control, ≤0 have been converted to 0.000001
mhdm5_2	IL-5 to house dust mite at 2 years: mRNA expression above unstimulated control, ≤0 have been converted to 0.000001
mhdm5_3	IL-5 to house dust mite at 3 years: mRNA expression above unstimulated control, ≤0 have been converted to 0.000001
mhdm5_5	IL-5 to house dust mite at 5 years: mRNA expression above unstimulated control, ≤0 have been converted to 0.000001
mhdm9_cd	IL-9 to house dust mite in CBMC from cord blood, mRNA expression above unstimulated control, ≤0 have been converted to 0.000001
mhdm9_6m	IL-9 to house dust mite at 6 months: mRNA expression above unstimulated control, ≤0 have been converted to 0.000001
mhdm9_1	IL-9 to house dust mite at 1 year: mRNA expression above unstimulated control, ≤0 have been converted to 0.000001
mhdm9_2	IL-9 to house dust mite at 2 years: mRNA expression above unstimulated control, ≤0 have been converted to 0.000001
mhdm9_3	IL-9 to house dust mite at 3 years: mRNA expression above unstimulated control, ≤0 have been converted to 0.000001
mhdm9_5	IL-9 to house dust mite at 5 years: mRNA expression above unstimulated control, ≤0 have been converted to 0.000001
mhdmg_cd	IFNg to house dust mite in CBMC from cord blood, mRNA expression above unstimulated control, ≤0 have been converted to 0.000001
mhdmg_6m	IFNg to house dust mite at 6 months: mRNA expression above unstimulated control, ≤0 have been converted to 0.000001
mhdmg_1	IFNg to house dust mite at 1 year: mRNA expression above unstimulated control, ≤0 have been converted to 0.000001
mhdmg_2	IFNg to house dust mite at 2 years: mRNA expression above unstimulated control, ≤0 have been converted to 0.000001
mhdmg_3	IFNg to house dust mite at 3 years: mRNA expression above unstimulated control, ≤0 have been converted to 0.000001
mhdmg_5	IFNg to house dust mite at 5 years: mRNA expression above unstimulated control, ≤0 have been converted to 0.000001
mhdmcish_2	CISH to house dust mite at 2 years: mRNA expression above unstimulated control, ≤0 have been converted to 0.000001
mhdmdac_2	DACT1 to house dust mite at 2 years: mRNA expression above unstimulated control, ≤0 have been converted to 0.000001
mhdmplx_2	PLXDC1 to house dust mite at 2 years: mRNA expression above unstimulated control, ≤0 have been converted to 0.000001
hdm13_cd	IL-13 to house dust mite (D. pteronyssinus) in CBMC from cord blood. Protein production above unstimulated control, ≤0 converted to 0.01pg/ml. Continuous pg/ml.
hdm13_6m	IL-13 to house dust mite (D. pteronyssinus) at 6 months. Protein production above unstimulated control, ≤0 converted to 0.01pg/ml. Continuous pg/ml.
hdm13_1	IL-13 to house dust mite (D. pteronyssinus) at 1 year. Protein production above unstimulated control, ≤0 converted to 0.01pg/ml. Continuous pg/ml.
hdm13_2	IL-13 to house dust mite (D. pteronyssinus) at 2 years. Protein production above unstimulated control, ≤0 converted to 0.01pg/ml. Continuous pg/ml.
hdm13_3	IL-13 to house dust mite (D. pteronyssinus) at 3 years. Protein production above unstimulated control, ≤0 converted to 0.01pg/ml. Continuous pg/ml.
hdm13_5	IL-13 to house dust mite (D. pteronyssinus) at 5 years. Protein production above unstimulated control, ≤0 converted to 0.01pg/ml. Continuous pg/ml.
hdm5_cd	IL-5 to house dust mite (D. pteronyssinus) in CBMC from cord blood. Protein production above unstimulated control, ≤0 converted to 0.01pg/ml. Continuous pg/ml.
hdm5_6m	IL-5 to house dust mite (D. pteronyssinus) at 6 months. Protein production above unstimulated control, ≤0 converted to 0.01pg/ml. Continuous pg/ml.
hdm5_1	IL-5 to house dust mite (D. pteronyssinus) at 1 year. Protein production above unstimulated control, ≤0 converted to 0.01pg/ml. Continuous pg/ml.
hdm5_2	IL-5 to house dust mite (D. pteronyssinus) at 2 years. Protein production above unstimulated control, ≤0 converted to 0.01pg/ml. Continuous pg/ml.
hdm5_3	IL-5 to house dust mite (D. pteronyssinus) at 3 years. Protein production above unstimulated control, ≤0 converted to 0.01pg/ml. Continuous pg/ml.
hdm5_5	IL-5 to house dust mite (D. pteronyssinus) at 5 years. Protein production above unstimulated control, ≤0 converted to 0.01pg/ml. Continuous pg/ml.
hdm10_cd	IL-10 to house dust mite (D. pteronyssinus) in CBMC from cord blood. Protein production above unstimulated control, ≤0 converted to 0.01pg/ml. Continuous pg/ml.
hdm10_6m	IL-10 to house dust mite (D. pteronyssinus) at 6 months. Protein production above unstimulated control, ≤0 converted to 0.01pg/ml. Continuous pg/ml.
hdm10_1	IL-10 to house dust mite (D. pteronyssinus) at 1 year. Protein production above unstimulated control, ≤0 converted to 0.01pg/ml. Continuous pg/ml.
hdm10_2	IL-10 to house dust mite (D. pteronyssinus) at 2 years. Protein production above unstimulated control, ≤0 converted to 0.01pg/ml. Continuous pg/ml.
hdm10_3	IL-10 to house dust mite (D. pteronyssinus) at 3 years. Protein production above unstimulated control, ≤0 converted to 0.01pg/ml. Continuous pg/ml.
hdm10_5	IL-10 to house dust mite (D. pteronyssinus) at 5 years. Protein production above unstimulated control, ≤0 converted to 0.01pg/ml. Continuous pg/ml.
hdmg_cd	IFNg to house dust mite (D. pteronyssinus) in CBMC from cord blood. Protein production above unstimulated control, ≤0 converted to 0.01pg/ml. Continuous pg/ml.
hdmg_6m	IFNg to house dust mite (D. pteronyssinus) at 6 months. Protein production above unstimulated control, ≤0 converted to 0.01pg/ml. Continuous pg/ml.
hdmg_1	IFNg to house dust mite (D. pteronyssinus) at 1 year. Protein production above unstimulated control, ≤0 converted to 0.01pg/ml. Continuous pg/ml.
hdmg_2	IFNg to house dust mite (D. pteronyssinus) at 2 years. Protein production above unstimulated control, ≤0 converted to 0.01pg/ml. Continuous pg/ml.
hdmg_3	IFNg to house dust mite (D. pteronyssinus) at 3 years. Protein production above unstimulated control, ≤0 converted to 0.01pg/ml. Continuous pg/ml.
hdmg_5	IFNg to house dust mite (D. pteronyssinus) at 5 years. Protein production above unstimulated control, ≤0 converted to 0.01pg/ml. Continuous pg/ml.
hdmt_1	TNFa to house dust mite (D. pteronyssinus) at 1 year. (pg/ml) Protein production above unstimulated control (<=0 have been converted to 0.01)
cat13_cd	IL-13 to cat in CBMC from cord blood. Protein production above unstimulated control, ≤0 converted to 0.01pg/ml. Continuous pg/ml.
fel13_cd	IL-13 to Fel d1 (cat allergen) in CBMC from cord blood. Protein production above unstimulated control, ≤0 converted to 0.01pg/ml. Continuous pg/ml.
fel13_5	IL-13 to Fel d1 (Cat allergen) at 5 years. (pg/ml) Protein production above unstimulated control (<=0 have been converted to 0.01)
cat5_cd	IL-5 to cat in CBMC from cord blood. Protein production above unstimulated control, ≤0 converted to 0.01pg/ml. Continuous pg/ml.
fel5_cd	IL-5 to Fel d1 (cat allergen) in CBMC from cord blood. Protein production above unstimulated control, ≤0 converted to 0.01pg/ml. Continuous pg/ml.
fel5_5	IL-5 to Fel d1 (Cat allergen) at 5 years. (pg/ml) Protein production above unstimulated control (<=0 have been converted to 0.01)
cat10_cd	IL-10 to cat in CBMC from cord blood. Protein production above unstimulated control, ≤0 converted to 0.01pg/ml. Continuous pg/ml.
fel10_cd	IL-10 to Fel d1 (cat allergen) in CBMC from cord blood. Protein production above unstimulated control, ≤0 converted to 0.01pg/ml. Continuous pg/ml.
fel10_5	IL-10 to Fel d1 (Cat allergen) at 5 years. (pg/ml) Protein production above unstimulated control (<=0 have been converted to 0.01)
catg_cd	IFNg to cat in CBMC from cord blood. Protein production above unstimulated control, ≤0 converted to 0.01pg/ml. Continuous pg/ml.
felg_cd	IFNg to Fel d1 (cat allergen) in CBMC from cord blood. Protein production above unstimulated control, ≤0 converted to 0.01pg/ml. Continuous pg/ml.
felg_5	IFNg to Fel d1 (Cat allergen) at 5 years. (pg/ml) Protein production above unstimulated control (<=0 have been converted to 0.01)
ara13_6m	IL-13 to arah2 (peanut allergen) at 6 months. (pg/ml) Protein production above unstimulated control (<=0 have been converted to 0.01)
ara13_1	IL-13 to arah2 (peanut allergen) at 1 year. (pg/ml) Protein production above unstimulated control (<=0 have been converted to 0.01)
pnt13_2	IL-13 to peanut at 2 years. (pg/ml) Protein production above unstimulated control (<=0 have been converted to 0.01)
pnt13_5	IL-13 to peanut at 5 years. (pg/ml) Protein production above unstimulated control (<=0 have been converted to 0.01)
ara5_6m	IL-5 to arah2 (peanut allergen) at 6 months. (pg/ml) Protein production above unstimulated control (<=0 have been converted to 0.01)
ara5_1	IL-5 to arah2 (peanut allergen) at 1 year. (pg/ml) Protein production above unstimulated control (<=0 have been converted to 0.01)
pnt5_2	IL-5 to peanut at 2 years. (pg/ml) Protein production above unstimulated control (<=0 have been converted to 0.01)
pnt5_5	IL-5 to peanut at 5 years. (pg/ml) Protein production above unstimulated control (<=0 have been converted to 0.01)
ara10_6m	IL-10 to arah2 (peanut allergen) at 6 months. (pg/ml) Protein production above unstimulated control (<=0 have been converted to 0.01)
ara10_1	IL-10 to arah2 (peanut allergen) at 1 year. (pg/ml) Protein production above unstimulated control (<=0 have been converted to 0.01)
pnt10_2	IL-10 to peanut at 2 years. (pg/ml) Protein production above unstimulated control (<=0 have been converted to 0.01)
pnt10_5	IL-10 to peanut at 5 years. (pg/ml) Protein production above unstimulated control (<=0 have been converted to 0.01)
arag_6m	IFNg to arah2 (peanut allergen) at 6 months. (pg/ml) Protein production above unstimulated control (<=0 have been converted to 0.01)
arag_1	IFNg to arah2 (peanut allergen) at 1 year. (pg/ml) Protein production above unstimulated control (<=0 have been converted to 0.01)
pntg_2	IFNg to peanut at 2 years. (pg/ml) Protein production above unstimulated control (<=0 have been converted to 0.01)
pntg_5	IFNg to peanut at 5 years. (pg/ml) Protein production above unstimulated control (<=0 have been converted to 0.01)
arat_1	TNFa to arah2 (peanut allergen) at 1 year. (pg/ml) Protein production above unstimulated control (<=0 have been converted to 0.01)
ova13_cd	IL-13 to OVA (ovalbumin) in CBMC from cord blood. Protein production above unstimulated control, ≤0 converted to 0.01pg/ml. Continuous pg/ml.
ova13_6m	IL-13 to ovalbumin at 6 months. (pg/ml) Protein production above unstimulated control (<=0 have been converted to 0.01)
ova13_1	IL-13 to ovalbumin at 1 year. (pg/ml) Protein production above unstimulated control (<=0 have been converted to 0.01)
ova13_2	IL-13 to ovalbumin at 2 years. (pg/ml) Protein production above unstimulated control (<=0 have been converted to 0.01)
ova13_5	IL-13 to ovalbumin at 5 years. (pg/ml) Protein production above unstimulated control (<=0 have been converted to 0.01)
ova5_cd	IL-5 to OVA (ovalbumin) in CBMC from cord blood. Protein production above unstimulated control, ≤0 converted to 0.01pg/ml. Continuous pg/ml.
ova5_6m	IL-5 to ovalbumin at 6 months. (pg/ml) Protein production above unstimulated control (<=0 have been converted to 0.01)
ova5_1	IL-5 to ovalbumin at 1 year. (pg/ml) Protein production above unstimulated control (<=0 have been converted to 0.01)
ova5_2	IL-5 to ovalbumin at 2 years. (pg/ml) Protein production above unstimulated control (<=0 have been converted to 0.01)
ova5_5	IL-5 to ovalbumin at 5 years. (pg/ml) Protein production above unstimulated control (<=0 have been converted to 0.01)
ova10_cd	IL-10 to OVA (ovalbumin) in CBMC from cord blood. Protein production above unstimulated control, ≤0 converted to 0.01pg/ml. Continuous pg/ml.
ova10_6m	IL-10 to ovalbumin at 6 months. (pg/ml) Protein production above unstimulated control (<=0 have been converted to 0.01)
ova10_1	IL-10 to ovalbumin at 1 year. (pg/ml) Protein production above unstimulated control (<=0 have been converted to 0.01)
ova10_2	IL-10 to ovalbumin at 2 years. (pg/ml) Protein production above unstimulated control (<=0 have been converted to 0.01)
ova10_5	IL-10 to ovalbumin at 5 years. (pg/ml) Protein production above unstimulated control (<=0 have been converted to 0.01)
ovag_cd	IFNg to OVA (ovalbumin) in CBMC from cord blood. Protein production above unstimulated control, ≤0 converted to 0.01pg/ml. Continuous pg/ml.
ovag_6m	IFNg to ovalbumin at 6 months. (pg/ml) Protein production above unstimulated control (<=0 have been converted to 0.01)
ovag_1	IFNg to ovalbumin at 1 year. (pg/ml) Protein production above unstimulated control (<=0 have been converted to 0.01)
ovag_2	IFNg to ovalbumin at 2 years. (pg/ml) Protein production above unstimulated control (<=0 have been converted to 0.01)
ovag_5	IFNg to ovalbumin at 5 years. (pg/ml) Protein production above unstimulated control (<=0 have been converted to 0.01)
ovat_1	TNFa to ovalbumin at 1 year. (pg/ml) Protein production above unstimulated control (<=0 have been converted to 0.01)
rye13_2	IL-13 to rye grass pollen (Lolium perenne) at 2 years. (pg/ml) Protein production above unstimulated control (<=0 have been converted to 0.01)
rye13_3	IL-13 to rye grass pollen (Lolium perenne) at 3 years. (pg/ml) Protein production above unstimulated control (<=0 have been converted to 0.01)
rye13_5	IL-13 to rye grass pollen (Lolium perenne) at 5 years. (pg/ml) Protein production above unstimulated control (<=0 have been converted to 0.01)
rye5_2	IL-5 to rye grass pollen (Lolium perenne) at 2 years. (pg/ml) Protein production above unstimulated control (<=0 have been converted to 0.01)
rye5_3	IL-5 to rye grass pollen (Lolium perenne) at 3 years. (pg/ml) Protein production above unstimulated control (<=0 have been converted to 0.01)
rye5_5	IL-5 to rye grass pollen (Lolium perenne) at 5 years. (pg/ml) Protein production above unstimulated control (<=0 have been converted to 0.01)
rye10_2	IL-10 to rye grass pollen (Lolium perenne) at 2 years. (pg/ml) Protein production above unstimulated control (<=0 have been converted to 0.01)
rye10_3	IL-10 to rye grass pollen (Lolium perenne) at 3 years. (pg/ml) Protein production above unstimulated control (<=0 have been converted to 0.01)
rye10_5	IL-10 to rye grass pollen (Lolium perenne) at 5 years. (pg/ml) Protein production above unstimulated control (<=0 have been converted to 0.01)
ryeg_2	IFNg to rye grass pollen (Lolium perenne) at 2 years. (pg/ml) Protein production above unstimulated control (<=0 have been converted to 0.01)
ryeg_3	IFNg to rye grass pollen (Lolium perenne) at 3 years. (pg/ml) Protein production above unstimulated control (<=0 have been converted to 0.01)
ryeg_5	IFNg to rye grass pollen (Lolium perenne) at 5 years. (pg/ml) Protein production above unstimulated control (<=0 have been converted to 0.01)
lpsg10_cd	IL-10 to INFg primed LPS (Lipopolysaccharide, TLR 4 ligand) at birth. (pg/ml) Protein production above unstimulated control (<=0 have been converted to 0.01)
lpsg10_6m	IL-10 to INFg primed LPS (Lipopolysaccharide, TLR 4 ligand) at 6 months. (pg/ml) Protein production above unstimulated control (<=0 have been converted to 0.01)
lpsg10_1	IL-10 to INFg primed LPS (Lipopolysaccharide, TLR 4 ligand) at 1 year. (pg/ml) Protein production above unstimulated control (<=0 have been converted to 0.01)
lpsg10_2	IL-10 to INFg primed LPS (Lipopolysaccharide, TLR 4 ligand) at 2 years. (pg/ml) Protein production above unstimulated control (<=0 have been converted to 0.01)
lpsg10_3	IL-10 to INFg primed LPS (Lipopolysaccharide, TLR 4 ligand) at 3 years. (pg/ml) Protein production above unstimulated control (<=0 have been converted to 0.01)
lpsg10_5	IL-10 to INFg primed LPS (Lipopolysaccharide, TLR 4 ligand) at 5 years. (pg/ml) Protein production above unstimulated control (<=0 have been converted to 0.01)
lpsg12_cd	IL-12 to INFg primed LPS (Lipopolysaccharide, TLR 4 ligand) at birth. (pg/ml) Protein production above unstimulated control (<=0 have been converted to 0.01)
lpsg12_6m	IL-12 to INFg primed LPS (Lipopolysaccharide, TLR 4 ligand) at 6 months. (pg/ml) Protein production above unstimulated control (<=0 have been converted to 0.01)
lpsg12_1	IL-12 to INFg primed LPS (Lipopolysaccharide, TLR 4 ligand) at 1 year. (pg/ml) Protein production above unstimulated control (<=0 have been converted to 0.01)
lpsg_g_2	IFNg to INFg primed LPS (Lipopolysaccharide, TLR 4 ligand) at 2 years. (pg/ml) Protein production above unstimulated control (<=0 have been converted to 0.01)
lpsg_g_3	IFNg to INFg primed LPS (Lipopolysaccharide, TLR 4 ligand) at 3 years. (pg/ml) Protein production above unstimulated control (<=0 have been converted to 0.01)
lpsg_g_5	IFNg to INFg primed LPS (Lipopolysaccharide, TLR 4 ligand) at 5 years. (pg/ml) Protein production above unstimulated control (<=0 have been converted to 0.01)
lpsgt_2	TNFa to INFg primed LPS (Lipopolysaccharide, TLR 4 ligand) at 2 years. (pg/ml) Protein production above unstimulated control (<=0 have been converted to 0.01)
lpsgt_3	TNFa to INFg primed LPS (Lipopolysaccharide, TLR 4 ligand) at 3 years. (pg/ml) Protein production above unstimulated control (<=0 have been converted to 0.01)
lpsgt_5	TNFa to INFg primed LPS (Lipopolysaccharide, TLR 4 ligand) at 5 years. (pg/ml) Protein production above unstimulated control (<=0 have been converted to 0.01)
pha10_cd	IL-10 to PHA (Phytohaemagglutinin) in CBMC from cord blood. Protein production above unstimulated control, ≤0 converted to 0.01pg/ml. Continuous pg/ml.
pha10_6m	IL-10 to PHA (Phytohaemagglutinin) at 6 months. (pg/ml) Protein production above unstimulated control (<=0 have been converted to 0.01)
pha10_1	IL-10 to PHA (Phytohaemagglutinin) at 1 year. (pg/ml) Protein production above unstimulated control (<=0 have been converted to 0.01)
pha10_2	IL-10 to PHA (Phytohaemagglutinin) at 2 years. (pg/ml) Protein production above unstimulated control (<=0 have been converted to 0.01)
pha10_5	IL-10 to PHA (Phytohaemagglutinin) at 5 years. (pg/ml) Protein production above unstimulated control (<=0 have been converted to 0.01)
pha13_cd	IL-13 to PHA (Phytohaemagglutinin) in CBMC from cord blood. Protein production above unstimulated control, ≤0 converted to 0.01pg/ml. Continuous pg/ml.
pha13_6m	IL-13 to PHA (Phytohaemagglutinin) at 6 months. (pg/ml) Protein production above unstimulated control (<=0 have been converted to 0.01)
pha13_1	IL-13 to PHA (Phytohaemagglutinin) at 1 year. (pg/ml) Protein production above unstimulated control (<=0 have been converted to 0.01)
pha13_2	IL-13 to PHA (Phytohaemagglutinin) at 2 years. (pg/ml) Protein production above unstimulated control (<=0 have been converted to 0.01)
pha13_5	IL-13 to PHA (Phytohaemagglutinin) at 5 years. (pg/ml) Protein production above unstimulated control (<=0 have been converted to 0.01)
pha5_cd	IL-5 to PHA (Phytohaemagglutinin) in CBMC from cord blood. Protein production above unstimulated control, ≤0 converted to 0.01pg/ml. Continuous pg/ml.
pha5_6m	IL-5 to PHA (Phytohaemagglutinin) at 6 months. (pg/ml) Protein production above unstimulated control (<=0 have been converted to 0.01)
pha5_1	IL-5 to PHA (Phytohaemagglutinin) at 1 year. (pg/ml) Protein production above unstimulated control (<=0 have been converted to 0.01)
pha5_2	IL-5 to PHA (Phytohaemagglutinin) at 2 years. (pg/ml) Protein production above unstimulated control (<=0 have been converted to 0.01)
pha5_5	IL-5 to PHA (Phytohaemagglutinin) at 5 years. (pg/ml) Protein production above unstimulated control (<=0 have been converted to 0.01)
phag_cd	IFNg to PHA (Phytohaemagglutinin) in CBMC from cord blood. Protein production above unstimulated control, ≤0 converted to 0.01pg/ml. Continuous pg/ml.
phag_6m	IFNg to PHA (Phytohaemagglutinin) at 6 months. (pg/ml) Protein production above unstimulated control (<=0 have been converted to 0.01)
phag_1	IFNg to PHA (Phytohaemagglutinin) at 1 year. (pg/ml) Protein production above unstimulated control (<=0 have been converted to 0.01)
phag_2	IFNg to PHA (Phytohaemagglutinin) at 2 years. (pg/ml) Protein production above unstimulated control (<=0 have been converted to 0.01)
phag_5	IFNg to PHA (Phytohaemagglutinin) at 5 years. (pg/ml) Protein production above unstimulated control (<=0 have been converted to 0.01)
phat_1	TNFa to PHA (Phytohaemagglutinin) at 1 year. (pg/ml) Protein production above unstimulated control (<=0 have been converted to 0.01)
seb10_cd	IL-10 to SEB (Staphylococcal enterotoxin B) in CBMC from cord blood. Protein production above unstimulated control, ≤0 converted to 0.01pg/ml. Continuous pg/ml.
seb10_6m	IL-10 to Staphylococcal enterotoxin B at 6 months. (pg/ml) Protein production above unstimulated control (<=0 have been converted to 0.01)
seb10_1	IL-10 to Staphylococcal enterotoxin B at 1 year. (pg/ml) Protein production above unstimulated control (<=0 have been converted to 0.01)
seb10_2	IL-10 to Staphylococcal enterotoxin B at 2 years. (pg/ml) Protein production above unstimulated control (<=0 have been converted to 0.01)
seb10_5	IL-10 to Staphylococcal enterotoxin B at 5 years. (pg/ml) Protein production above unstimulated control (<=0 have been converted to 0.01)
seb13_cd	IL-13 to SEB (Staphylococcal enterotoxin B) in CBMC from cord blood. Protein production above unstimulated control, ≤0 converted to 0.01pg/ml. Continuous pg/ml.
seb13_6m	IL-13 to Staphylococcal enterotoxin B at 6 months. (pg/ml) Protein production above unstimulated control (<=0 have been converted to 0.01)
seb13_1	IL-13 to Staphylococcal enterotoxin B at 1 year. (pg/ml) Protein production above unstimulated control (<=0 have been converted to 0.01)
seb13_2	IL-13 to Staphylococcal enterotoxin B at 2 years. (pg/ml) Protein production above unstimulated control (<=0 have been converted to 0.01)
seb13_5	IL-13 to Staphylococcal enterotoxin B at 5 years. (pg/ml) Protein production above unstimulated control (<=0 have been converted to 0.01)
seb5_cd	IL-5 to SEB (Staphylococcal enterotoxin B) in CBMC from cord blood. Protein production above unstimulated control, ≤0 converted to 0.01pg/ml. Continuous pg/ml.
seb5_6m	IL-5 to Staphylococcal enterotoxin B at 6 months. (pg/ml) Protein production above unstimulated control (<=0 have been converted to 0.01)
seb5_1	IL-5 to Staphylococcal enterotoxin B at 1 year. (pg/ml) Protein production above unstimulated control (<=0 have been converted to 0.01)
seb5_2	IL-5 to Staphylococcal enterotoxin B at 2 years. (pg/ml) Protein production above unstimulated control (<=0 have been converted to 0.01)
seb5_5	IL-5 to Staphylococcal enterotoxin B at 5 years. (pg/ml) Protein production above unstimulated control (<=0 have been converted to 0.01)
sebg_cd	IFNg to SEB (Staphylococcal enterotoxin B) in CBMC from cord blood. Protein production above unstimulated control, ≤0 converted to 0.01pg/ml. Continuous pg/ml.
sebg_6m	IFNg to Staphylococcal enterotoxin B at 6 months. (pg/ml) Protein production above unstimulated control (<=0 have been converted to 0.01)
sebg_1	IFNg to Staphylococcal enterotoxin B at 1 year. (pg/ml) Protein production above unstimulated control (<=0 have been converted to 0.01)
sebg_2	IFNg to Staphylococcal enterotoxin B at 2 years. (pg/ml) Protein production above unstimulated control (<=0 have been converted to 0.01)
sebg_5	IFNg to Staphylococcal enterotoxin B at 5 years. (pg/ml) Protein production above unstimulated control (<=0 have been converted to 0.01)
sebt_1	TNFa to Staphylococcal enterotoxin B at 1 year. (pg/ml) Protein production above unstimulated control (<=0 have been converted to 0.01)
rsv10_6m	IL-10 to RSV (Respiratory Syncytial Virus) at 6 months. (pg/ml) Protein production above unstimulated control (<=0 have been converted to 0.01)
rsv10_1	IL-10 to RSV (Respiratory Syncytial Virus) at 1 year. (pg/ml) Protein production above unstimulated control (<=0 have been converted to 0.01)
rsv13_6m	IL-13 to RSV (Respiratory Syncytial Virus) at 6 months. (pg/ml) Protein production above unstimulated control (<=0 have been converted to 0.01)
rsv13_1	IL-13 to RSV (Respiratory Syncytial Virus) at 1 year. (pg/ml) Protein production above unstimulated control (<=0 have been converted to 0.01)
rsv5_6m	IL-5 to RSV (Respiratory Syncytial Virus) at 6 months. (pg/ml) Protein production above unstimulated control (<=0 have been converted to 0.01)
rsv5_1	IL-5 to RSV (Respiratory Syncytial Virus) at 1 year. (pg/ml) Protein production above unstimulated control (<=0 have been converted to 0.01)
rsvg_6m	IFNg to RSV (Respiratory Syncytial Virus) at 6 months. (pg/ml) Protein production above unstimulated control (<=0 have been converted to 0.01)
rsvg_1	IFNg to RSV (Respiratory Syncytial Virus) at 1 year. (pg/ml) Protein production above unstimulated control (<=0 have been converted to 0.01)
rsvt_1	TNFa to RSV (Respiratory Syncytial Virus) at 1 year. (pg/ml) Protein production above unstimulated control (<=0 have been converted to 0.01)
tt10_6m	IL-10 to tetanus toxoid at 6 months. (pg/ml) Protein production above unstimulated control (<=0 have been converted to 0.01)
tt10_1	IL-10 to tetanus toxoid at 1 year. (pg/ml) Protein production above unstimulated control (<=0 have been converted to 0.01)
tt10_2	IL-10 to tetanus toxoid at 2 years. (pg/ml) Protein production above unstimulated control (<=0 have been converted to 0.01)
tt10_5	IL-10 to tetanus toxoid at 5 years. (pg/ml) Protein production above unstimulated control (<=0 have been converted to 0.01)
tt13_6m	IL-13 to tetanus toxoid at 6 months. (pg/ml) Protein production above unstimulated control (<=0 have been converted to 0.01)
tt13_1	IL-13 to tetanus toxoid at 1 year. (pg/ml) Protein production above unstimulated control (<=0 have been converted to 0.01)
tt13_2	IL-13 to tetanus toxoid at 2 years. (pg/ml) Protein production above unstimulated control (<=0 have been converted to 0.01)
tt13_5	IL-13 to tetanus toxoid at 5 years. (pg/ml) Protein production above unstimulated control (<=0 have been converted to 0.01)
tt5_6m	IL-5 to tetanus toxoid at 6 months. (pg/ml) Protein production above unstimulated control (<=0 have been converted to 0.01)
tt5_1	IL-5 to tetanus toxoid at 1 year. (pg/ml) Protein production above unstimulated control (<=0 have been converted to 0.01)
tt5_2	IL-5 to tetanus toxoid at 2 years. (pg/ml) Protein production above unstimulated control (<=0 have been converted to 0.01)
tt5_5	IL-5 to tetanus toxoid at 5 years. (pg/ml) Protein production above unstimulated control (<=0 have been converted to 0.01)
ttg_6m	IFNg to tetanus toxoid at 6 months. (pg/ml) Protein production above unstimulated control (<=0 have been converted to 0.01)
ttg_1	IFNg to tetanus toxoid at 1 year. (pg/ml) Protein production above unstimulated control (<=0 have been converted to 0.01)
ttg_2	IFNg to tetanus toxoid at 2 years. (pg/ml) Protein production above unstimulated control (<=0 have been converted to 0.01)
ttg_5	IFNg to tetanus toxoid at 5 years. (pg/ml) Protein production above unstimulated control (<=0 have been converted to 0.01)
tt_t_1	TNFa to tetanus toxoid at 1 year. (pg/ml) Protein production above unstimulated control (<=0 have been converted to 0.01)
ic10_cd	IL-10 to poly I:C (TLR 3 ligand) in CMBC from cord blood. (pg/ml) Protein production above unstimulated control (<=0 have been converted to 0.01)
ic10_2	IL-10 to poly I:C at 2 years. (pg/ml) Protein production above unstimulated control (<=0 have been converted to 0.01)
ic10_4	IL-10 to poly I:C at 4 years. (pg/ml) Protein production above unstimulated control (<=0 have been converted to 0.01)
ic10_5	IL-10 to poly I:C at 5 years. (pg/ml) Protein production above unstimulated control (<=0 have been converted to 0.01)
ic10_10	IL-10 to poly I:C at 10 years. (pg/ml) Protein production above unstimulated control (<=0 have been converted to 0.01)
ic1b_cd	IL-1b to poly I:C (TLR 3 ligand) in CMBC from cord blood. (pg/ml) Protein production above unstimulated control (<=0 have been converted to 0.01)
ic1b_4	IL-1b to poly I:C at 4 years. (pg/ml) Protein production above unstimulated control (<=0 have been converted to 0.01)
ic1b_10	IL-1b to poly I:C at 10 years. (pg/ml) Protein production above unstimulated control (<=0 have been converted to 0.01)
ic6_cd	IL-6 to poly I:C (TLR 3 ligand) in CMBC from cord blood. (pg/ml) Protein production above unstimulated control (<=0 have been converted to 0.01)
ic6_4	IL-6 to poly I:C at 4 years. (pg/ml) Protein production above unstimulated control (<=0 have been converted to 0.01)
ic6_10	IL-6 to poly I:C at 10 years. (pg/ml) Protein production above unstimulated control (<=0 have been converted to 0.01)
ic8_cd	IL-8 to poly I:C (TLR 3 ligand) in CMBC from cord blood. (pg/ml) Protein production above unstimulated control (<=0 have been converted to 0.01)
ic8_4	IL-8 to poly I:C at 4 years. (pg/ml) Protein production above unstimulated control (<=0 have been converted to 0.01)
ic8_10	IL-8 to poly I:C at 10 years. (pg/ml) Protein production above unstimulated control (<=0 have been converted to 0.01)
icg_cd	IL-10 to poly I:C (TLR 3 ligand) in CMBC from cord blood. (pg/ml) Protein production above unstimulated control (<=0 have been converted to 0.01)
icg_2	IL-10 to poly I:C at 2 years. (pg/ml) Protein production above unstimulated control (<=0 have been converted to 0.01)
icg_4	IL-10 to poly I:C at 4 years. (pg/ml) Protein production above unstimulated control (<=0 have been converted to 0.01)
icg_5	IL-10 to poly I:C at 5 years. (pg/ml) Protein production above unstimulated control (<=0 have been converted to 0.01)
icg_10	IL-10 to poly I:C at 10 years. (pg/ml) Protein production above unstimulated control (<=0 have been converted to 0.01)
icip_cd	IP-10 to poly I:C (TLR 3 ligand) in CMBC from cord blood. (pg/ml) Protein production above unstimulated control (<=0 have been converted to 0.01)
icip_4	IP-10 to poly I:C at 4 years. (pg/ml) Protein production above unstimulated control (<=0 have been converted to 0.01)
icip_10	IP-10 to poly I:C at 10 years. (pg/ml) Protein production above unstimulated control (<=0 have been converted to 0.01)
icmp_cd	MIP1a to poly I:C (TLR 3 ligand) in CMBC from cord blood. (pg/ml) Protein production above unstimulated control (<=0 have been converted to 0.01)
icmp_4	MIP1a to poly I:C at 4 years. (pg/ml) Protein production above unstimulated control (<=0 have been converted to 0.01)
icmp_10	MIP1a to poly I:C at 10 years. (pg/ml) Protein production above unstimulated control (<=0 have been converted to 0.01)
ict_cd	TNFa to poly I:C (TLR 3 ligand) in CMBC from cord blood. (pg/ml) Protein production above unstimulated control (<=0 have been converted to 0.01)
ict_2	TNFa to poly I:C at 2 years. (pg/ml) Protein production above unstimulated control (<=0 have been converted to 0.01)
ict_4	TNFa to poly I:C at 4 years. (pg/ml) Protein production above unstimulated control (<=0 have been converted to 0.01)
ict_5	TNFa to poly I:C at 5 years. (pg/ml) Protein production above unstimulated control (<=0 have been converted to 0.01)
ict_10	TNFa to poly I:C at 10 years. (pg/ml) Protein production above unstimulated control (<=0 have been converted to 0.01)
lta10_2	IL-10 to lipoteichoic acid (TLR 2 ligand) at 2 years. (pg/ml) Protein production above unstimulated control (<=0 have been converted to 0.01)
lta10_5	IL-10 to lipoteichoic acid (TLR 2 ligand) at 5 years. (pg/ml) Protein production above unstimulated control (<=0 have been converted to 0.01)
ltag_2	IFNg to lipoteichoic acid (TLR 2 ligand) at 2 years. (pg/ml) Protein production above unstimulated control (<=0 have been converted to 0.01)
ltag_5	IFNg to lipoteichoic acid (TLR 2 ligand) at 5 years. (pg/ml) Protein production above unstimulated control (<=0 have been converted to 0.01)
ltat_2	TNFa to lipoteichoic acid (TLR 2 ligand) at 2 years. (pg/ml) Protein production above unstimulated control (<=0 have been converted to 0.01)
ltat_5	TNFa to lipoteichoic acid (TLR 2 ligand) at 5 years. (pg/ml) Protein production above unstimulated control (<=0 have been converted to 0.01)
pi10_2	IL-10 to PMA/ionomycin at 2 years. (pg/ml) Protein production above unstimulated control (<=0 have been converted to 0.01)
pi10_5	IL-10 to PMA/ionomycin at 5 years. (pg/ml) Protein production above unstimulated control (<=0 have been converted to 0.01)
pi13_2	IL-13 to PMA/ionomycin at 2 years. (pg/ml) Protein production above unstimulated control (<=0 have been converted to 0.01)
pi13_5	IL-13 to PMA/ionomycin at 5 years. (pg/ml) Protein production above unstimulated control (<=0 have been converted to 0.01)
pi5_2	IL-5 to PMA/ionomycin at 2 years. (pg/ml) Protein production above unstimulated control (<=0 have been converted to 0.01)
pi5_5	IL-5 to PMA/ionomycin at 5 years. (pg/ml) Protein production above unstimulated control (<=0 have been converted to 0.01)
pig_2	IFNg to PMA/ionomycin at 2 years. (pg/ml) Protein production above unstimulated control (<=0 have been converted to 0.01)
pig_5	IFNg to PMA/ionomycin at 5 years. (pg/ml) Protein production above unstimulated control (<=0 have been converted to 0.01)
ps10_2	IL-10 to pansorbin (TLR 2 ligand) at 2 years. (pg/ml) Protein production above unstimulated control (<=0 have been converted to 0.01)
ps10_5	IL-10 to pansorbin (TLR 2 ligand) at 5 years. (pg/ml) Protein production above unstimulated control (<=0 have been converted to 0.01)
psg_2	IFNg to pansorbin (TLR 2 ligand) at 2 years. (pg/ml) Protein production above unstimulated control (<=0 have been converted to 0.01)
psg_5	IFNg to pansorbin (TLR 2 ligand) at 5 years. (pg/ml) Protein production above unstimulated control (<=0 have been converted to 0.01)
pst_2	TNFa to pansorbin (TLR 2 ligand) at 2 years. (pg/ml) Protein production above unstimulated control (<=0 have been converted to 0.01)
pst_5	TNFa to pansorbin (TLR 2 ligand) at 5 years. (pg/ml) Protein production above unstimulated control (<=0 have been converted to 0.01)
msl10_5	IL-10 to measles lysate at 5 years. (pg/ml) Protein production above unstimulated control (<=0 have been converted to 0.01)
msl13_5	IL-13 to measles lysate at 5 years. (pg/ml) Protein production above unstimulated control (<=0 have been converted to 0.01)
msl5_5	IL-5 to measles lysate at 5 years. (pg/ml) Protein production above unstimulated control (<=0 have been converted to 0.01)
mslg_5	IFNg to measles lysate at 5 years. (pg/ml) Protein production above unstimulated control (<=0 have been converted to 0.01)
ppd10_cd	IL-10 to PPD (Purified Protein Derivative of Mycobacterium tuberculosis) in CBMC from cord blood. Protein production above unstimulated control. ≤0 converted to 0.01pg/ml. Continuous pg/ml.
ppd13_cd	IL-13 to PPD (Purified Protein Derivative of Mycobacterium tuberculosis) in CBMC from cord blood. Protein production above unstimulated control. ≤0 converted to 0.01pg/ml. Continuous pg/ml.
ppd5_cd	IL-5 to PPD (Purified Protein Derivative of Mycobacterium tuberculosis) in CBMC from cord blood. Protein production above unstimulated control. ≤0 converted to 0.01pg/ml. Continuous pg/ml.
ppdg_cd	IFNg to PPD (Purified Protein Derivative of Mycobacterium tuberculosis) in CBMC from cord blood. Protein production above unstimulated control. ≤0 converted to 0.01pg/ml. Continuous pg/ml.
hiswl6m	Diameter of wheal size to Histamine in mm at 6 months
hiswl2	Diameter of wheal size to Histamine in mm at 2 years
hiswl5	Diameter of wheal size to Histamine in mm at 5 years
hiswl10	Diameter of wheal size to Histamine in mm at 10 years
hdmwl6m	Diameter of wheal size to HDM in mm at 6 months
hdmwl2	Diameter of wheal size to HDM in mm at 2 years
hdmwl5	Diameter of wheal size to HDM in mm at 5 years
hdmwl10	Diameter of wheal size to HDM in mm at 10 years
catwl6m	Diameter of wheal size to cat allergen in mm at 6 months
catwl2	Diameter of wheal size to cat allergen in mm at 2 years
catwl5	Diameter of wheal size to cat allergen in mm at 5 years
catwl10	Diameter of wheal size to cat allergen in mm at 10 years
ryewl6m	Diameter of wheal size to ryegrass allergen in mm at 6 months
ryewl2	Diameter of wheal size to ryegrass allergen in mm at 2 years
ryewl5	Diameter of wheal size to ryegrass allergen in mm at 5 years
ryewl10	Diameter of wheal size to ryegrass allergen in mm at 10 years
altwl6m	Diameter of wheal size to alternaria in mm at 6 months
altwl2	Diameter of wheal size to alternaria in mm at 2 years
altwl5	Diameter of wheal size to alternaria in mm at 5 years
aspwl6m	Diameter of wheal size to aspergillus in mm at 6 months
aspwl2	Diameter of wheal size to aspergillus in mm at 2 years
aspwl5	Diameter of wheal size to aspergillus in mm at 5 years
mouwl10	Diameter of wheal size to mould in mm at 10 years
cmwl6m	Diameter of wheal size to cow's milk in mm at 6 months
cmwl2	Diameter of wheal size to cow's milk in mm at 2 years
cmwl5	Diameter of wheal size to cow's milk in mm at 5 years
ewwl6m	Diameter of wheal size to egg white in mm at 6 months
ewwl2	Diameter of wheal size to egg white in mm at 2 years
ewwl5	Diameter of wheal size to egg white in mm at 5 years
pntwl5	Diameter of wheal size to peanujt in mm at 5 years
pntwl10	Diameter of wheal size to peanujt in mm at 10 years
couwl10	Diameter of wheal size to couch grass in mm at 10 years
grwl10	Diameter of wheal size to grass in mm at 10 years
totige_100_6m	Total IgE at 6 months greater than 100 kU/L
totige_100_1	Total IgE at 1 year greater than 100 kU/L
totige_100_2	Total IgE at 2 years greater than 100 kU/L
totige_100_3	Total IgE at 3 years greater than 100 kU/L
totige_100_4	Total IgE at 4 years greater than 100 kU/L
totige_100_5	Total IgE at 5 years greater than 100 kU/L
totige_100_10	Total IgE at 10 years greater than 100 kU/L
hdmige_035_6m	HDM IgE at 6 months greater than 0.35 kU/L
hdmige_035_1	HDM IgE at 1 year greater than 0.35 kU/L
hdmige_035_2	HDM IgE at 2 years greater than 0.35 kU/L
hdmige_035_3	HDM IgE at 3 years greater than 0.35 kU/L
hdmige_035_4	HDM IgE at 4 years greater than 0.35 kU/L
hdmige_035_5	HDM IgE at 5 years greater than 0.35 kU/L
hdmige_035_10	HDM IgE at 10 years greater than 0.35 kU/L
catige_035_6m	Cat IgE at 6 months greater than 0.35 kU/L
catige_035_1	Cat IgE at 1 year greater than 0.35 kU/L
catige_035_2	Cat IgE at 2 years greater than 0.35 kU/L
catige_035_3	Cat IgE at 3 years greater than 0.35 kU/L
catige_035_4	Cat IgE at 4 years greater than 0.35 kU/L
catige_035_5	Cat IgE at 5 years greater than 0.35 kU/L
catige_035_10	Cat IgE at 10 years greater than 0.35 kU/L
pntige_035_6m	Peanut IgE at 6 months greater than 0.35 kU/L
pntige_035_1	Peanut IgE at 1 year greater than 0.35 kU/L
pntige_035_2	Peanut IgE at 2 years greater than 0.35 kU/L
pntige_035_3	Peanut IgE at 3 years greater than 0.35 kU/L
pntige_035_4	Peanut IgE at 4 years greater than 0.35 kU/L
pntige_035_5	Peanut IgE at 5 years greater than 0.35 kU/L
pntige_035_10	Peanut IgE at 10 years greater than 0.35 kU/L
couige_035_6m	Couch grass IgE at 6 months greater than 0.35 kU/L
couige_035_1	Couch grass IgE at 1 year greater than 0.35 kU/L
couige_035_2	Couch grass IgE at 2 years greater than 0.35 kU/L
couige_035_3	Couch grass IgE at 3 years greater than 0.35 kU/L
couige_035_4	Couch grass IgE at 4 years greater than 0.35 kU/L
couige_035_5	Couch grass IgE at 5 years greater than 0.35 kU/L
couige_035_10	Couch grass IgE at 10 years greater than 0.35 kU/L
ryeige_035_6m	Ryegrass IgE at 6 months greater than 0.35 kU/L
ryeige_035_1	Ryegrass IgE at 1 year greater than 0.35 kU/L
ryeige_035_3	Ryegrass IgE at 3 years greater than 0.35 kU/L
ryeige_035_4	Ryegrass IgE at 4 years greater than 0.35 kU/L
ryeige_035_5	Ryegrass IgE at 5 years greater than 0.35 kU/L
ryeige_035_10	Ryegrass IgE at 10 years greater than 0.35 kU/L
mouige_035_6m	Mould IgE at 6 months greater than 0.35 kU/L
mouige_035_1	Mould IgE at 1 year greater than 0.35 kU/L
mouige_035_2	Mould IgE at 2 years greater than 0.35 kU/L
mouige_035_3	Mould IgE at 3 years greater than 0.35 kU/L
mouige_035_4	Mould IgE at 4 years greater than 0.35 kU/L
mouige_035_5	Mould IgE at 5 years greater than 0.35 kU/L
mouige_035_10	Mould IgE at 10 years greater than 0.35 kU/L
phinfige_035_6m	Phadiatop IgE at 6 months greater than 0.35 PAU/L
phinfige_035_1	Phadiatop IgE at 1 year greater than 0.35 PAU/L
phinfige_035_2	Phadiatop IgE at 2 years greater than 0.35 PAU/L
phinfige_035_3	Phadiatop IgE at 3 years greater than 0.35 PAU/L
phinfige_035_4	Phadiatop IgE at 4 years greater than 0.35 PAU/L
phadige_035_5	Phadiatop IgE at 5 years greater than 0.35 PAU/L
hisspt6m	Positive skin prick test to Histamine at 6 months (diameter >= 2mm)
hisspt2	Positive skin prick test to Histamine at 2 years (diameter >= 2mm)
hisspt5	Positive skin prick test to Histamine at 5 years (diameter >= 3mm)
hisspt10	Positive skin prick test to Histamine at 10 years (diameter >= 3mm)
hdmspt6m	Positive skin prick test to HDM at 6 months (diameter >= 2mm)
hdmspt2	Positive skin prick test to HDM at 2 years (diameter >= 2mm)
hdmspt5	Positive skin prick test to HDM at 5 years (diameter >= 3mm)
hdmspt10	Positive skin prick test to HDM at 10 years (diameter >= 3mm)
catspt6m	Positive skin prick test to cat allergen at 6 months (diameter >= 2mm)
catspt2	Positive skin prick test to cat allergen at 2 years (diameter >= 2mm)
catspt5	Positive skin prick test to cat allergen at 5 years (diameter >= 3mm)
catspt10	Positive skin prick test to cat allergen at 10 years (diameter >= 3mm)
ryespt6m	Positive skin prick test to ryegrass allergen at 6 months (diameter >= 2mm)
ryespt2	Positive skin prick test to ryegrass allergen at 2 years (diameter >= 2mm)
ryespt5	Positive skin prick test to ryegrass allergen at 5 years (diameter >= 3mm)
ryespt10	Positive skin prick test to ryegrass allergen at 10 years (diameter >= 3mm)
altspt6m	Positive skin prick test to alternaria at 6 months (diameter >= 2mm)
altspt2	Positive skin prick test to alternaria at 2 years (diameter >= 2mm)
altspt5	Positive skin prick test to alternaria at 5 years (diameter >= 3mm)
aspspt6m	Positive skin prick test to aspergillus at 6 months (diameter >= 2mm)
aspspt2	Positive skin prick test to aspergillus at 2 years (diameter >= 2mm)
aspspt5	Positive skin prick test to aspergillus at 5 years (diameter >= 3mm)
cmspt6m	Positive skin prick test to cow's milk at 6 months (diameter >= 2mm)
cmspt2	Positive skin prick test to cow's milk at 2 years (diameter >= 2mm)
cmspt5	Positive skin prick test to cow's milk at 5 years (diameter >= 3mm)
ewspt6m	Positive skin prick test to egg white at 6 months (diameter >= 2mm)
ewspt2	Positive skin prick test to egg white at 2 years (diameter >= 2mm)
ewspt5	Positive skin prick test to egg white at 5 years (diameter >= 3mm)
sptany6m	Positive skin prick test to any of cat, ryegrass, HDM, alternaria, aspergillus, cow's milk or egg white at 6 months (diameter >= 2mm)
sptany2	Positive skin prick test to any of cat, ryegrass, HDM, alternaria, aspergillus, cow's milk or egg white at 2 years (diameter >= 2mm)
sptany5	Positive skin prick test to any of cat, ryegrass, HDM, alternaria, aspergillus, cow's milk or egg white at 5 years (diameter >= 3mm)
sptany10	Positive skin prick test to any of cat, ryegrass, HDM at 10 years (diameter >= 3mm)
ari_1	Total number of acute respiratory tract infections in the last 12 months at 1 year of age (either upper or lower)
ari_2	Total number of acute respiratory tract infections in the last 12 months at 2 years of age (either upper or lower)
ari_3	Total number of acute respiratory tract infections in the last 12 months at 3 years of age (either upper or lower)
ari_4	Total number of acute respiratory tract infections in the last 12 months at 4 years of age (either upper or lower)
ari_5	Total number of acute respiratory tract infections in the last 12 months at 5 years of age (either upper or lower)
uri_1	Number of upper respiratory tract infections in the last 12 months at 1 year of age
uri_2	Number of upper respiratory tract infections in the last 12 months at 2 years of age
uri_3	Number of upper respiratory tract infections in the last 12 months at 3 years of age
uri_4	Number of upper respiratory tract infections in the last 12 months at 4 years of age
uri_5	Number of upper respiratory tract infections in the last 12 months at 5 years of age
lri_1	Number of lower respiratory tract infections in the last 12 months at 1 year of age
lri_2	Number of lower respiratory tract infections in the last 12 months at 2 years of age
lri_3	Number of lower respiratory tract infections in the last 12 months at 3 years of age
lri_4	Number of lower respiratory tract infections in the last 12 months at 4 years of age
lri_5	Number of lower respiratory tract infections in the last 12 months at 5 years of age
wlri_1	Number of wheezy lower respiratory tract infections in the last 12 months at 1 year of age
wlri_2	Number of wheezy lower respiratory tract infections in the last 12 months at 2 years of age
wlri_3	Number of wheezy lower respiratory tract infections in the last 12 months at 3 years of age
wlri_4	Number of wheezy lower respiratory tract infections in the last 12 months at 4 years of age
wlri_5	Number of wheezy lower respiratory tract infections in the last 12 months at 5 years of age
flri_1	Number of febrile lower respiratory tract infections in the last 12 months at 1 year of age
flri_2	Number of febrile lower respiratory tract infections in the last 12 months at 2 years of age
flri_3	Number of febrile lower respiratory tract infections in the last 12 months at 3 years of age
flri_4	Number of febrile lower respiratory tract infections in the last 12 months at 4 years of age
flri_5	Number of febrile lower respiratory tract infections in the last 12 months at 5 years of age
slri_1	Number of severe (wheezy or febrile) lower respiratory tract infections in the last 12 months at 1 year of age
slri_2	Number of severe (wheezy or febrile) lower respiratory tract infections in the last 12 months at 2 years of age
slri_3	Number of severe (wheezy or febrile) lower respiratory tract infections in the last 12 months at 3 years of age
slri_4	Number of severe (wheezy or febrile) lower respiratory tract infections in the last 12 months at 4 years of age
slri_5	Number of severe (wheezy or febrile) lower respiratory tract infections in the last 12 months at 5 years of age
rsv_uri_1	Number of upper respiratory tract infections with RSV positive PCR in the last 12 months at 1 year of age
rsv_uri_2	Number of upper respiratory tract infections with RSV positive PCR in the last 12 months at 2 years of age
rsv_uri_3	Number of upper respiratory tract infections with RSV positive PCR in the last 12 months at 3 years of age
rsv_lri_1	Number of lower respiratory tract infections with RSV positive PCR in the last 12 months at 1 year of age
rsv_lri_2	Number of lower respiratory tract infections with RSV positive PCR in the last 12 months at 2 years of age
rsv_lri_3	Number of lower respiratory tract infections with RSV positive PCR in the last 12 months at 3 years of age
rsv_wlri_1	Number of wheezy lower respiratory tract infections with RSV positive PCR in the last 12 months at 1 year of age
rsv_wlri_2	Number of wheezy lower respiratory tract infections with RSV positive PCR in the last 12 months at 2 years of age
rsv_wlri_3	Number of wheezy lower respiratory tract infections with RSV positive PCR in the last 12 months at 3 years of age
rsv_flri_1	Number of febrile lower respiratory tract infections with RSV positive PCR in the last 12 months at 1 year of age
rsv_flri_2	Number of febrile lower respiratory tract infections with RSV positive PCR in the last 12 months at 2 years of age
rsv_flri_3	Number of febrile lower respiratory tract infections with RSV positive PCR in the last 12 months at 3 years of age
influ_uri_1	Number of upper respiratory tract infections with influenza positive PCR in the last 12 months at 1 year of age
influ_uri_2	Number of upper respiratory tract infections with influenza positive PCR in the last 12 months at 2 years of age
influ_uri_3	Number of upper respiratory tract infections with influenza positive PCR in the last 12 months at 3 years of age
influ_lri_1	Number of lower respiratory tract infections with influenza positive PCR in the last 12 months at 1 year of age
influ_lri_2	Number of lower respiratory tract infections with influenza positive PCR in the last 12 months at 2 years of age
influ_lri_3	Number of lower respiratory tract infections with influenza positive PCR in the last 12 months at 3 years of age
influ_wlri_1	Number of wheezy lower respiratory tract infections with influenza positive PCR in the last 12 months at 1 year of age
influ_wlri_2	Number of wheezy lower respiratory tract infections with influenza positive PCR in the last 12 months at 2 years of age
influ_wlri_3	Number of wheezy lower respiratory tract infections with influenza positive PCR in the last 12 months at 3 years of age
influ_flri_1	Number of febrile lower respiratory tract infections with influenza positive PCR in the last 12 months at 1 year of age
influ_flri_2	Number of febrile lower respiratory tract infections with influenza positive PCR in the last 12 months at 2 years of age
influ_flri_3	Number of febrile lower respiratory tract infections with influenza positive PCR in the last 12 months at 3 years of age
hrva_uri_1	Number of upper respiratory tract infections with HRV-A positive PCR in the last 12 months at 1 year of age
hrva_uri_2	Number of upper respiratory tract infections with HRV-A positive PCR in the last 12 months at 2 years of age
hrva_uri_3	Number of upper respiratory tract infections with HRV-A positive PCR in the last 12 months at 3 years of age
hrva_lri_1	Number of lower respiratory tract infections with HRV-A positive PCR in the last 12 months at 1 year of age
hrva_lri_2	Number of lower respiratory tract infections with HRV-A positive PCR in the last 12 months at 2 years of age
hrva_lri_3	Number of lower respiratory tract infections with HRV-A positive PCR in the last 12 months at 3 years of age
hrva_wlri_1	Number of wheezy lower respiratory tract infections with HRV-A positive PCR in the last 12 months at 1 year of age
hrva_wlri_2	Number of wheezy lower respiratory tract infections with HRV-A positive PCR in the last 12 months at 2 years of age
hrva_wlri_3	Number of wheezy lower respiratory tract infections with HRV-A positive PCR in the last 12 months at 3 years of age
hrva_flri_1	Number of febrile lower respiratory tract infections with HRV-A positive PCR in the last 12 months at 1 year of age
hrva_flri_2	Number of febrile lower respiratory tract infections with HRV-A positive PCR in the last 12 months at 2 years of age
hrva_flri_3	Number of febrile lower respiratory tract infections with HRV-A positive PCR in the last 12 months at 3 years of age
hrvb_uri_1	Number of upper respiratory tract infections with HRV-B positive PCR in the last 12 months at 1 year of age
hrvb_uri_2	Number of upper respiratory tract infections with HRV-B positive PCR in the last 12 months at 2 years of age
hrvb_uri_3	Number of upper respiratory tract infections with HRV-B positive PCR in the last 12 months at 3 years of age
hrvb_lri_1	Number of lower respiratory tract infections with HRV-B positive PCR in the last 12 months at 1 year of age
hrvb_lri_2	Number of lower respiratory tract infections with HRV-B positive PCR in the last 12 months at 2 years of age
hrvb_lri_3	Number of lower respiratory tract infections with HRV-B positive PCR in the last 12 months at 3 years of age
hrvb_wlri_1	Number of wheezy lower respiratory tract infections with HRV-B positive PCR in the last 12 months at 1 year of age
hrvb_wlri_2	Number of wheezy lower respiratory tract infections with HRV-B positive PCR in the last 12 months at 2 years of age
hrvb_wlri_3	Number of wheezy lower respiratory tract infections with HRV-B positive PCR in the last 12 months at 3 years of age
hrvb_flri_1	Number of febrile lower respiratory tract infections with HRV-B positive PCR in the last 12 months at 1 year of age
hrvb_flri_2	Number of febrile lower respiratory tract infections with HRV-B positive PCR in the last 12 months at 2 years of age
hrvb_flri_3	Number of febrile lower respiratory tract infections with HRV-B positive PCR in the last 12 months at 3 years of age
hrvc_uri_1	Number of upper respiratory tract infections with HRV-C positive PCR in the last 12 months at 1 year of age
hrvc_uri_2	Number of upper respiratory tract infections with HRV-C positive PCR in the last 12 months at 2 years of age
hrvc_uri_3	Number of upper respiratory tract infections with HRV-C positive PCR in the last 12 months at 3 years of age
hrvc_lri_1	Number of lower respiratory tract infections with HRV-C positive PCR in the last 12 months at 1 year of age
hrvc_lri_2	Number of lower respiratory tract infections with HRV-C positive PCR in the last 12 months at 2 years of age
hrvc_lri_3	Number of lower respiratory tract infections with HRV-C positive PCR in the last 12 months at 3 years of age
hrvc_wlri_1	Number of wheezy lower respiratory tract infections with HRV-C positive PCR in the last 12 months at 1 year of age
hrvc_wlri_2	Number of wheezy lower respiratory tract infections with HRV-C positive PCR in the last 12 months at 2 years of age
hrvc_wlri_3	Number of wheezy lower respiratory tract infections with HRV-C positive PCR in the last 12 months at 3 years of age
hrvc_flri_1	Number of febrile lower respiratory tract infections with HRV-C positive PCR in the last 12 months at 1 year of age
hrvc_flri_2	Number of febrile lower respiratory tract infections with HRV-C positive PCR in the last 12 months at 2 years of age
hrvc_flri_3	Number of febrile lower respiratory tract infections with HRV-C positive PCR in the last 12 months at 3 years of age
riskMPGs_0_2_quart	Quartile of % healthy NPAs with risk-associated MPGs, up to 2 years of age
riskMPGs_2_4_quart	Quartile of % healthy NPAs with risk-associated MPGs, from 2 to 4 years of age
healthMPGs_0_2_quart	Quartile of % healthy NPAs with health-associated MPGs, up to 2 years of age
healthMPGs_2_4_quart	Quartile of % healthy NPAs with health-associated MPGs, from 2 to 4 years of age
wlri_1.ari_1	Proporiton of ARIs that are wLRIs at 1 year of age
wlri_2.ari_2	Proporiton of ARIs that are wLRIs at 2 years of age
wlri_3.ari_3	Proporiton of ARIs that are wLRIs at 3 years of age
wlri_4.ari_4	Proporiton of ARIs that are wLRIs at 4 years of age
wlri_5.ari_5	Proporiton of ARIs that are wLRIs at 5 years of age
flri_1.ari_1	Proporiton of ARIs that are fLRIs at 1 year of age
flri_2.ari_2	Proporiton of ARIs that are fLRIs at 2 years of age
flri_3.ari_3	Proporiton of ARIs that are fLRIs at 3 years of age
flri_4.ari_4	Proporiton of ARIs that are fLRIs at 4 years of age
flri_5.ari_5	Proporiton of ARIs that are fLRIs at 5 years of age
slri_1.ari_1	Proporiton of ARIs that are sLRIs at 1 year of age
slri_2.ari_2	Proporiton of ARIs that are sLRIs at 2 years of age
slri_3.ari_3	Proporiton of ARIs that are sLRIs at 3 years of age
slri_4.ari_4	Proporiton of ARIs that are sLRIs at 4 years of age
slri_5.ari_5	Proporiton of ARIs that are sLRIs at 5 years of age
wlri_1.lri_1	Proporiton of LRIs that are wLRIs at 1 year of age
wlri_2.lri_2	Proporiton of LRIs that are wLRIs at 2 years of age
wlri_3.lri_3	Proporiton of LRIs that are wLRIs at 3 years of age
wlri_4.lri_4	Proporiton of LRIs that are wLRIs at 4 years of age
wlri_5.lri_5	Proporiton of LRIs that are wLRIs at 5 years of age
flri_1.lri_1	Proporiton of LRIs that are fLRIs at 1 year of age
flri_2.lri_2	Proporiton of LRIs that are fLRIs at 2 years of age
flri_3.lri_3	Proporiton of LRIs that are fLRIs at 3 years of age
flri_4.lri_4	Proporiton of LRIs that are fLRIs at 4 years of age
flri_5.lri_5	Proporiton of LRIs that are fLRIs at 5 years of age
slri_1.lri_1	Proporiton of LRIs that are sLRIs at 1 year of age
slri_2.lri_2	Proporiton of LRIs that are sLRIs at 2 years of age
slri_3.lri_3	Proporiton of LRIs that are sLRIs at 3 years of age
slri_4.lri_4	Proporiton of LRIs that are sLRIs at 4 years of age
slri_5.lri_5	Proporiton of LRIs that are sLRIs at 5 years of age
riskMPGs_0_2	% healthy NPAs with risk-associated MPGs, up to 2 years of age
riskMPGs_2_4	% healthy NPAs with risk-associated MPGs, from 2 to 4 years of age
healthMPGs_0_2	% healthy NPAs with health-associated MPGs, up to 2 years of age
healthMPGs_2_4	% healthy NPAs with health-associated MPGs, from 2 to 4 years of age
strep_raw_6m	Average relative abundance of Streptococcus (raw count) in first infeciton-naïve NPA at 6 months of age
strep_raw_7w	Average relative abundance of Streptococcus (raw count) in first infeciton-naïve NPA at 7 weeks of age
strep_cn_6m	Average relative abundance of Streptococcus (copy-number corrected) in first infeciton-naïve NPA at 6 months of age
strep_cn_7w	Average relative abundance of Streptococcus (copy-number corrected) in first infeciton-naïve NPA at 7 weeks of age
strep_raw_6m_20	Proportion of samples with > 20% Streptococcus (raw count) in first infeciton-naïve NPA at 6 months of age
strep_raw_7w_20	Proportion of samples with > 20% Streptococcus (raw count) in first infeciton-naïve NPA at 7 weeks of age
strep_cn_6m_20	Proportion of samples with > 20% Streptococcus (copy-number corrected) in first infeciton-naïve NPA at 6 months of age
strep_cn_7w_20	Proportion of samples with > 20% Streptococcus (copy-number corrected) in first infeciton-naïve NPA at 7 weeks of age
