# Supplementary material for: Trajectories of childhood immune development and respiratory health relevant to asthma and allergy
Source: eLife journal article supplement (doi:10.7554/elife.35856), 2018-10-15
Supplement: supp [file elife-35856-supp-v1.zip › elife_poa_e35856_Supplementary_File_3.xlsx]

## Sheet: CAS1
predictor	OR	lower	upper	p_value
uri_1	1.2	0.9	1.6	0.21
uri_2	1.1	0.88	1.3	0.47
uri_3	0.86	0.66	1.1	0.23
uri_4	0.95	0.72	1.2	0.68
lri_1	0.97	0.71	1.3	0.84
lri_2	1.2	0.88	1.6	0.26
lri_3	2	1.3	3.2	0.0023
lri_4	2	1.4	3.4	0.002
wlri_1	1.3	0.68	2.4	0.43
wlri_2	1.2	0.8	2	0.33
wlri_3	2.8	1.6	5.6	0.0013
wlri_4	2.5	1.5	5	0.004
flri_1	1.6	0.77	3.6	0.21
flri_2	1	0.44	2.2	1
flri_3	2	1	4.8	0.08
flri_4	1.8	0.97	4.1	0.092
rsv_uri_1	1	0.24	3.8	0.96
rsv_lri_1	0.45	0.11	1.4	0.2
rsv_wlri_1	1.2	0.12	9.4	0.88
rsv_flri_1	0.2	0.0096	1.3	0.15
influ_uri_1	1.6	0.39	6.4	0.52
influ_lri_1	1.3	0.2	7.8	0.79
influ_wlri_1	1.4	0.05	40	0.82
influ_flri_1	1.2	0.046	19	0.9
hrva_uri_1	NA	NA	NA	0.5
hrva_lri_1	0.8	0.42	1.3	0.42
hrva_wlri_1	2.1	0.44	9.9	0.33
hrva_flri_1	1.1	0.26	3.9	0.93
hrvb_uri_1	NA	NA	NA	0.5
hrvb_lri_1	3.8	0.33	55	0.28
hrvb_wlri_1	NA	NA	NA	0.5
hrvb_flri_1	19	0.91	981	0.084
hrvc_uri_1	NA	NA	NA	0.5
hrvc_lri_1	0.94	0.46	1.8	0.87
hrvc_flri_1	3.5	0.65	21	0.15
rsv_uri_2	1.1	0.16	4.6	0.93
rsv_lri_2	0.53	0.1	2.2	0.41
rsv_wlri_2	0.78	0.098	4.4	0.79
rsv_flri_2	0.26	0.013	1.8	0.24
influ_uri_2	0.36	0.017	2.7	0.39
influ_lri_2	4.1	0.34	95	0.28
influ_wlri_2	4.1	0.34	95	0.28
influ_flri_2	3.3e-07	NA	1.7e+122	0.99
hrva_uri_2	NA	NA	NA	0.5
hrva_lri_2	1.4	0.61	3.5	0.4
hrva_wlri_2	1.7	0.43	6.1	0.43
hrva_flri_2	4.8	0.86	46	0.12
hrvb_uri_2	NA	NA	NA	0.5
hrvb_lri_2	1.3e-07	NA	2.8e+121	0.99
hrvb_wlri_2	NA	NA	NA	0.5
hrvb_flri_2	1.3e-07	NA	2.8e+121	0.99
hrvc_uri_2	NA	NA	NA	0.5
hrvc_lri_2	1.3	0.66	2.5	0.45
hrvc_flri_2	1.8	0.26	13	0.52
rsv_uri_3	2.5	0.67	9.7	0.17
rsv_lri_3	1.7	0.43	6.8	0.45
rsv_wlri_3	2.2	0.32	28	0.44
rsv_flri_3	1.2	0.14	6.9	0.88
influ_uri_3	0.7	0.033	6	0.77
influ_lri_3	7.8	0.54	241	0.15
influ_wlri_3	29000000	6.8e-108	NA	0.99
influ_flri_3	7.8	0.54	241	0.15
hrva_uri_3	NA	NA	NA	0.5
hrva_lri_3	3	1.4	7.3	0.0076
hrva_wlri_3	18	3.7	155	0.0021
hrva_flri_3	2.1	0.42	12	0.36
hrvb_uri_3	NA	NA	NA	0.5
hrvb_lri_3	5.3	0.19	151	0.27
hrvb_wlri_3	9.8e-07	NA	3.8e+122	0.99
hrvb_flri_3	9.8e-07	NA	3.8e+122	0.99
hrvc_uri_3	NA	NA	NA	0.5
hrvc_lri_3	1.7	0.66	4.2	0.26
hrvc_flri_3	11	0.68	381	0.11
totige6m	1.4	0.78	2.5	0.3
hdmige6m	8	0.85	94	0.074
catige6m	6.6	0.77	61	0.079
pntige6m	2.5	0.78	9	0.13
couige6m	2.8	0.51	14	0.21
ryeige6m	4.4	0.94	22	0.059
mouige6m	5.6	0.56	63	0.14
phinfige6m	1.2	0.44	2.9	0.73
totige1	0.88	0.6	1.3	0.52
hdmige1	1.5	0.22	7.8	0.65
catige1	2.1	0.13	30	0.57
pntige1	1.7	0.48	6.3	0.39
couige1	0.38	0.017	2.8	0.42
ryeige1	0.87	0.067	6.1	0.89
mouige1	3.9	0.18	159	0.38
phinfige1	0.73	0.2	2.5	0.63
totige2	1.1	0.74	1.8	0.61
hdmige2	0.93	0.28	2.5	0.89
catige2	0.55	0.042	3.7	0.57
pntige2	0.51	0.097	2	0.37
couige2	0.085	0.0034	0.7	0.057
mouige2	3.2e-10	NA	5.9e+81	0.99
phinfige2	0.33	0.091	1	0.065
totige3	2.2	0.93	6.1	0.093
hdmige3	1.4	0.68	2.9	0.32
catige3	1.7	0.49	5.6	0.35
pntige3	1.7	0.46	5.5	0.37
couige3	2	0.44	8	0.29
ryeige3	1.4	0.44	3.8	0.52
mouige3	1.8	0.66	4.8	0.22
phinfige3	1.8	0.8	4	0.16
totige4	2	0.73	6.5	0.21
hdmige4	1.9	0.94	4.1	0.086
catige4	0.75	0.0088	13	0.86
pntige4	0.2	0.00073	2.9	0.36
couige4	8.4e-13	NA	3.5e+172	0.99
ryeige4	0.78	0.14	2.5	0.7
mouige4	5.1e-08	NA	2.4e+91	0.99
phinfige4	1.8	0.91	3.8	0.094
hdmg4_6m	NA	NA	NA	0.55
catg4_6m	0.057	NA	2000000000000	0.99
pntg4_6m	NA	NA	NA	0.55
coug4_6m	NA	NA	NA	0.55
ryeg4_6m	NA	NA	NA	0.55
moug4_6m	1.2	0.63	2.3	0.54
phinfg4_6m	0.7	0.45	0.91	0.03
hdmg4_1	NA	NA	NA	0.61
catg4_1	0.76	0.43	1.1	0.22
pntg4_1	0.075	NA	3.5e+23	0.99
coug4_1	0.081	NA	9.7e+23	0.99
ryeg4_1	13	4.1e-20	NA	0.99
moug4_1	NA	NA	NA	0.61
phinfg4_1	0.91	0.72	1.2	0.4
hdmg4_2	1.1	0.71	1.6	0.67
catg4_2	1.4	1.1	1.7	0.011
pntg4_2	1.1	0.85	1.3	0.54
coug4_2	0.071	NA	2.1e+22	0.99
ryeg4_2	16	1.6e-21	NA	0.99
moug4_2	NA	NA	NA	0.56
phinfg4_2	1.1	0.89	1.3	0.49
hdmg4_3	1.1	0.85	1.5	0.35
catg4_3	1.3	1	1.6	0.05
pntg4_3	1.1	0.89	1.4	0.37
coug4_3	1.2	0.99	1.6	0.061
ryeg4_3	NA	NA	NA	0.49
moug4_3	0.09	NA	6.3e+21	0.99
phinfg4_3	2.3	1.1	6.8	0.091
hdmg4_4	1.2	0.98	1.5	0.082
catg4_4	1.4	1.1	2	0.027
pntg4_4	1.1	0.92	1.4	0.22
coug4_4	1.1	0.91	1.4	0.28
ryeg4_4	1	0.56	1.5	1
moug4_4	0.9	0.5	1.3	0.63
phinfg4_4	1	0.83	1.4	0.71
hdmigg_1	25	0.32	16000	0.19
catigg_1	1.5e-15	NA	1.2e+291	0.99
grassigg_1	1.1	0.16	6.3	0.91
hdmigg_2	0.8	0.15	3.5	0.78
catigg_2	0.66	0.077	3.5	0.65
grassigg_2	1.1	0.3	4.1	0.83
hdmigg_3	2.3	0.14	35	0.54
catigg_3	0.023	8.2e-06	2	0.18
grassigg_3	1.3	0.12	12	0.82
hiswl6m	0.7	0.31	1.4	0.35
hdmwl6m	1.8e-05	NA	4.7e+71	0.99
catwl6m	0.00075	NA	2.5e+40	0.99
ryewl6m	12000000	1e-84	NA	0.99
altwl6m	1.9	0.35	11	0.41
aspwl6m	8.2e-07	NA	3.8e+122	0.99
cmwl6m	1.2	0.61	2.3	0.62
ewwl6m	4.6e-05	NA	1.6e+27	0.99
hiswl2	1.5	1.1	2.2	0.026
hdmwl2	0.69	0.26	1.2	0.34
catwl2	1.2	0.54	2.3	0.67
ryewl2	0.81	0.31	1.7	0.61
altwl2	5.8e-08	NA	1e+59	0.99
aspwl2	1.5	0.66	3.3	0.3
cmwl2	1.4	0.6	2.9	0.42
ewwl2	0.98	0.21	3	0.97
mat_atopy	0.62	0.14	2.9	0.52
mat_had	0.14	0.013	1.1	0.068
matfh_xast	0.82	0.23	3.1	0.76
pat_atopy	0.73	0.22	2.5	0.6
pat_had	1.1	0.34	3.5	0.89
patfh_xast	0.83	0.27	2.5	0.73
smoke1	1.5	0.38	5.4	0.56
smoke2	1.4	0.38	5.1	0.59
smoke3	0.29	0.037	1.4	0.16
smoke4	0.64	0.089	3	0.6
care1	0.67	0.17	2.3	0.53
care2	0.77	0.24	2.4	0.65
care3	0.75	0.24	2.3	0.61
care4	1.8	0.38	14	0.49
crcatexp1	1.1	0.33	3.6	0.86
crcatexp2	0.77	0.21	2.5	0.68
crcatexp3	0.6	0.15	2.1	0.44
crcatexp4	0.61	0.15	2.2	0.47
nochdn1	1.6	0.88	3	0.14
nochdn2	1.8	0.93	3.6	0.096
nochdn3	1.2	0.72	2.3	0.43
nochdn4	0.99	0.56	1.7	0.97
oldchdbirth	1.9	1.1	3.6	0.04
oldchd1	1.6	0.88	3	0.14
oldchd2	1.8	1	3.7	0.063
oldchd3	1.6	0.89	3	0.13
oldchd4	1.5	0.85	2.6	0.17
bthodr	1.8	0.88	3.6	0.11
bas2	3.3e-05	5.2e-11	0.82	0.088
pDC2	0.064	0.0003	4.1	0.25
mDC2	0.047	0.00011	8.6	0.27
pDCmfi2	1	1	1	0.69
mDCmfi2	1	1	1	0.48
trecs1	2.7	0.19	45	0.46
ht3	0.99	0.86	1.1	0.87
ht4	0.97	0.83	1.1	0.66
wt3	0.92	0.6	1.4	0.69
wt4	0.91	0.67	1.2	0.5
iga6w	2	0.32	13	0.46
iga6m	0.63	0.1	3.5	0.6
lys6w	8.3	9.5e-06	3500000	0.75
lys6m	0.003	3.4e-08	32	0.26
prot6w	0.99	0.92	1	0.62
prot6m	0.98	0.83	1.1	0.81
lact6w	1.1	0.67	1.8	0.73
lact6m	0.95	0.55	1.5	0.83
vitdmat	2.6	0.17	46	0.5
mhdm13_2	0.14	NA	350000000000	0.99
mhdm4_2	1.1	0.85	1.4	0.49
mhdm4r_2	1.1	0.89	1.5	0.28
mhdm5_2	0.88	0.57	1.2	0.46
mhdm9_2	0.13	NA	2.6e+16	0.99
mhdmg_2	1.1	0.9	1.3	0.41
mhdmcish_2	1	0.86	1.2	0.97
mhdmdac_2	NA	NA	NA	0.52
mhdmplx_2	1.2	0.99	1.5	0.07
hdm5_cd	0.75	0.32	1.3	0.39
pha10_cd	0.79	0.2	3.2	0.74
pha13_cd	0.5	0.07	3.3	0.47
pha5_cd	0.92	0.63	1.4	0.66
phag_cd	1.1	0.63	2.4	0.71
pha10_6m	1.6	0.69	7.4	0.39
pha13_6m	1.8	0.83	9.4	0.29
pha5_6m	1.2	0.81	1.7	0.42
phag_6m	0.96	0.67	1.4	0.81
rsv10_6m	NA	NA	NA	0.22
rsv13_6m	NA	NA	NA	0.22
rsv5_6m	0.011	NA	6.1e+59	0.99
rsvg_6m	0.016	NA	2.2e+55	0.99
tt10_6m	1.4	0.54	3.7	0.43
tt13_6m	1.1	0.77	1.6	0.59
tt5_6m	1.2	0.8	1.7	0.43
ttg_6m	0.86	0.6	1.2	0.38
lpsg10_1	1.2	0.81	1.8	0.4
lpsg12_1	1.4	0.77	3.5	0.38
rsv10_1	NA	NA	NA	0.71
rsv13_1	1.8	0.59	6.4	0.31
rsv5_1	149	3.8e-62	NA	0.99
rsvg_1	1.1	0.42	2.2	0.87
tt10_1	1.6	0.49	5.9	0.43
tt13_1	1.1	0.77	1.6	0.58
tt5_1	1.2	0.8	1.7	0.43
ttg_1	0.96	0.68	1.3	0.81
hdm10_2	0.014	NA	1.1e+37	0.99
hdm13_2	1.1	0.59	2	0.77
hdm5_2	0.017	NA	4.4e+36	0.99
hdmg_2	0.05	NA	2.4e+24	0.99
pha10_2	0.66	0.063	6.9	0.73
pha13_2	1.1	0.18	7.2	0.92
pha5_2	2	0.99	6.8	0.14
phag_2	0.43	0.074	2.3	0.33
hdm10_3	NA	NA	NA	0.14
hdm13_3	1.1	0.69	1.9	0.6
hdm5_3	1.4	0.71	3.1	0.34
hdmg_3	1.2	0.65	2	0.57
pha10_3	0.96	0.55	1.9	0.9
pha13_3	0.63	0.12	3.3	0.58
pha5_3	1.4	0.68	4.4	0.44
phag_3	1.5	0.55	6.1	0.54
ic10_cd	1.2	0.79	2	0.36
ic1b_cd	1.3	0.89	2.1	0.18
ic6_cd	1	0.75	1.5	0.83
ic8_cd	0.98	0.75	1.3	0.9
icg_cd	0.9	0.59	1.4	0.6
icip_cd	0.65	0.22	1.8	0.4
icmp_cd	0.88	0.6	1.3	0.51
ict_cd	1.5	0.87	2.5	0.15
ic10_4	1	0.57	2	0.96
ic1b_4	0.92	0.64	1.3	0.64
ic6_4	1.5	0.85	4.7	0.3
ic8_4	1.3	0.99	1.6	0.064
icg_4	1	0.46	2.7	1
icip_4	0.4	0.12	1.2	0.11
icmp_4	1.5	0.81	5.2	0.35
ict_4	1.2	0.72	2.1	0.53
crez6m	0.38	0.11	1.2	0.11
crez1	0.91	0.28	2.8	0.87
crez2	0.64	0.18	2.1	0.47
crez3	0.98	0.28	3.1	0.97
crez4	1	0.28	3.6	0.95
strep_raw_6m	3.1	1.1	11	0.042
strep_cn_6m	3	1.1	10	0.046
strep_raw_6m_20	0.72	0.034	5.9	0.78
strep_cn_6m_20	0.72	0.034	5.9	0.78
ds_vitd3_cd	2.1	0.15	34	0.58
ds_vitd3_6m	0.028	0.0005	1.1	0.063
ds_vitd3_1	1.1	0.015	95	0.96
ds_vitd3_2	5	0.046	1300	0.53
ds_vitd3_3	1.1	0.052	37	0.95
ds_vitd3_4	6.8	0.022	2100	0.51
vitd3_cd	2.4	0.2	31	0.5
vitd3_6m	0.06	0.0023	1.2	0.072
vitd3_1	0.34	0.0084	15	0.57
vitd3_2	2.2	0.021	342	0.74
vitd3_3	0.73	0.025	25	0.86
vitd3_4	2.2	0.013	345	0.76
hdmigg_ige_1	1.1	0.22	8	0.88
hdmigg_ige_2	0.98	0.41	2.5	0.97
hdmigg_ige_3	0.75	0.37	1.6	0.42
catigg_ige_1	0.43	0.031	6	0.5
catigg_ige_2	1	0.3	3.4	0.96
catigg_ige_3	0.48	0.16	1.5	0.19
hdmg4_ige_6m	0.12	0.011	1.2	0.074
hdmg4_ige_1	0.67	0.13	4.5	0.65
hdmg4_ige_2	1.1	0.73	1.6	0.63
hdmg4_ige_3	1.1	0.8	1.4	0.6
hdmg4_ige_4	1.1	0.92	1.4	0.22
pntg4_ige_6m	0.4	0.11	1.3	0.13
pntg4_ige_1	0.58	0.16	1.6	0.36
pntg4_ige_2	1.1	0.87	1.4	0.44
pntg4_ige_3	1.1	0.88	1.3	0.44
pntg4_ige_4	1.1	0.93	1.4	0.19
ryeg4_ige_6m	0.23	0.045	1.1	0.059
ryeg4_ige_1	1.7	0.81	16	0.36
ryeg4_ige_3	0.71	0.26	2.3	0.52
ryeg4_ige_4	1	0.59	1.6	0.88
coug4_ige_6m	0.36	0.072	1.9	0.21
coug4_ige_1	1.2	0.3	2.8	0.72
coug4_ige_2	1.3	0.53	2.8	0.55
coug4_ige_3	1.2	0.97	1.5	0.087
coug4_ige_4	1.1	0.93	1.4	0.2
moug4_ige_6m	1.1	0.54	1.9	0.82
moug4_ige_1	0.25	0.0063	5.6	0.38
moug4_ige_2	3100000000	1.7e-82	NA	0.99
moug4_ige_3	0.55	0.21	1.3	0.21
moug4_ige_4	0.94	0.56	1.4	0.77
catg4_ige_6m	0.15	0.016	0.89	0.084
catg4_ige_1	0.76	0.43	1.1	0.2
catg4_ige_2	1.4	1.1	1.7	0.011
catg4_ige_3	1.2	0.99	1.5	0.077
catg4_ige_4	1.4	1.1	2	0.026
phinfg4_ige_6m	0.69	0.46	0.9	0.022
phinfg4_ige_1	0.92	0.73	1.2	0.46
phinfg4_ige_2	1.1	0.92	1.4	0.3
phinfg4_ige_3	1.4	0.95	2.6	0.19
phinfg4_ige_4	0.97	0.76	1.3	0.81
hdmigg_non_g4_1	25	0.32	16000	0.19
hdmigg_non_g4_2	0.82	0.15	3.6	0.8
hdmigg_non_g4_3	2.4	0.15	38	0.52
catigg_non_g4_1	1.5e-15	NA	1.2e+291	0.99
catigg_non_g4_2	0.61	0.066	3.4	0.6
catigg_non_g4_3	0.016	2.3e-06	1.9	0.18
hdmige_035_6m	NA	NA	NA	0.55
hdmige_035_1	NA	NA	NA	0.61
hdmige_035_2	1.3e-07	NA	2.2e+107	0.99
hdmige_035_3	4.4	0.87	24	0.07
hdmige_035_4	2.9	0.47	19	0.24
catige_035_6m	3.4e-06	NA	4.5e+122	0.99
catige_035_1	NA	NA	NA	0.61
catige_035_2	NA	NA	NA	0.56
catige_035_3	3.4	0.13	52	0.38
catige_035_4	NA	NA	NA	0.56
pntige_035_6m	2.5e-07	NA	1.5e+94	0.99
pntige_035_1	3.8	0.33	89	0.3
pntige_035_2	2.8e-07	NA	1.5e+122	0.99
pntige_035_3	1.6	0.069	17	0.72
pntige_035_4	3.6e-06	NA	1.6e+103	0.99
couige_035_6m	3.4e-06	NA	4.5e+122	0.99
couige_035_1	NA	NA	NA	0.61
couige_035_2	1.8e-07	NA	9.4e+121	0.99
couige_035_3	11	0.35	427	0.14
couige_035_4	2.3e-07	NA	2e+83	0.99
ryeige_035_6m	3.4e-06	NA	4.5e+122	0.99
ryeige_035_1	NA	NA	NA	0.61
ryeige_035_2	0.23	0.011	1.6	0.21
ryeige_035_3	6.2	0.6	64	0.11
ryeige_035_4	9.1e-08	NA	1e+101	0.99
mouige_035_6m	NA	NA	NA	0.55
mouige_035_1	NA	NA	NA	0.61
mouige_035_2	2.8e-07	NA	1.5e+122	0.99
mouige_035_3	2.4	0.29	16	0.36
mouige_035_4	9.5e-07	NA	3.3e+122	0.99
phinfige_035_6m	3.4	0.49	26	0.22
phinfige_035_1	0.19	0.0091	1.3	0.15
phinfige_035_2	0.33	0.016	2.3	0.33
phinfige_035_3	4.1	0.95	20	0.06
phinfige_035_4	1.5	0.33	5.9	0.59
totige_100_6m	NA	NA	NA	0.55
totige_100_1	NA	NA	NA	0.61
totige_100_2	3	0.35	21	0.27
totige_100_3	3.7	0.4	31	0.21
totige_100_4	2.1	0.36	11	0.39
hisspt6m	0.49	0.15	1.5	0.22
hisspt2	1.2	0.24	9.2	0.82
hdmspt6m	7.7e-07	NA	1.6e+122	0.99
hdmspt2	0.38	0.019	2.6	0.4
catspt6m	2.1e-07	NA	2.3e+107	0.99
catspt2	2.1	0.38	10	0.37
ryespt6m	NA	NA	NA	0.5
ryespt2	0.79	0.1	4	0.79
altspt6m	3.7	0.12	124	0.41
altspt2	1.8e-07	NA	2.1e+67	0.99
aspspt6m	NA	NA	NA	0.5
aspspt2	3.5	0.56	21	0.16
cmspt6m	1.4	0.058	21	0.79
cmspt2	2.1	0.36	11	0.38
ewspt6m	6.6e-08	NA	6.8e+70	0.99
ewspt2	1.2	0.051	15	0.88
sptany6m	0.27	0.014	1.7	0.24
sptany2	1.3	0.41	4	0.65
bmi4	0.95	0.58	1.5	0.82
bmi5	0.86	0.53	1.3	0.51
bmi10	1.1	0.84	1.5	0.43
slri_1	1.4	0.85	2.5	0.18
slri_2	1.2	0.81	1.8	0.37
slri_3	2.7	1.6	5.1	0.00078
slri_4	2.5	1.5	4.8	0.003
ari_1	1.1	0.88	1.5	0.36
ari_2	1.1	0.94	1.3	0.22
ari_3	1.1	0.87	1.3	0.58
ari_4	1.2	0.99	1.4	0.074
flri_1.lri_1	4.6	0.67	34	0.12
flri_2.lri_2	0.5	0.042	4.4	0.55
flri_1.ari_1	16	0.21	1100	0.19
flri_2.ari_2	0.87	0.0084	48	0.95
flri_3.ari_3	8	0.6	109	0.11
flri_4.ari_4	11	0.35	393	0.17
wlri_1.lri_1	3.1	0.56	19	0.2
wlri_2.lri_2	2.2	0.26	24	0.47
wlri_1.ari_1	5.4	0.32	75	0.21
wlri_2.ari_2	1.1	0.052	21	0.93
wlri_3.ari_3	24	2.8	295	0.0065
wlri_4.ari_4	8.3	1.1	72	0.043
slri_1.lri_1	6.3	1	54	0.062
slri_2.lri_2	1.5	0.14	21	0.75
slri_1.ari_1	6.3	0.47	80	0.15
slri_2.ari_2	1.1	0.087	12	0.91
slri_3.ari_3	30	3.6	361	0.0032
slri_4.ari_4	15	2.1	132	0.0091
hrvc_wlri_1	1.1	0.3	3.4	0.91
hrvc_wlri_2	1.6	0.5	5.2	0.43
hrvc_wlri_3	2.5	0.85	7.5	0.09
riskMPGs_0_2	0.9	0.13	5.7	0.91
riskMPGs_2_4	0.086	0.0068	0.71	0.034
healthMPGs_0_2	0.78	0.088	6.3	0.81
healthMPGs_2_4	32	2.5	688	0.013
riskMPGs_0_2_quart	1	0.54	1.8	0.98
riskMPGs_2_4_quart	0.45	0.19	0.88	0.035
healthMPGs_0_2_quart	0.93	0.48	1.8	0.81
healthMPGs_2_4_quart	2.4	1.2	5.7	0.022

## Sheet: CAS2
predictor	OR	lower	upper	p_value
uri_1	1.1	0.86	1.4	0.44
uri_2	0.91	0.68	1.2	0.46
uri_3	0.93	0.73	1.2	0.54
uri_4	1.1	0.9	1.4	0.3
lri_1	1	0.61	1.5	0.99
lri_2	1.5	0.97	2.5	0.069
lri_3	2.6	1.5	5.3	0.0027
lri_4	3.6	1.8	8.3	0.00065
wlri_1	1.1	0.35	3	0.83
wlri_2	1.6	0.89	2.9	0.12
wlri_3	3	1.4	8	0.016
wlri_4	6.3	2.5	21	0.00068
flri_1	0.84	0.28	1.9	0.71
flri_2	4.8	1.8	15	0.0039
flri_3	4.3	1.2	15	0.02
flri_4	2.6	0.88	8.3	0.082
rsv_uri_1	1.7	0.65	4.5	0.25
rsv_lri_1	0.74	0.11	3.3	0.72
rsv_wlri_1	1.8e-07	NA	4.6e+108	0.99
rsv_flri_1	2.1	0.09	25	0.57
influ_uri_1	1.8	0.42	6.7	0.41
influ_lri_1	2.1e-07	NA	1.8e+71	0.99
influ_wlri_1	NA	NA	NA	0.4
influ_flri_1	2.3e-07	NA	2.2e+108	0.99
hrva_uri_1	NA	NA	NA	0.4
hrva_lri_1	0.85	0.32	1.9	0.72
hrva_wlri_1	0.73	0.11	2.7	0.67
hrva_flri_1	0.5	0.026	3.1	0.53
hrvb_uri_1	NA	NA	NA	0.4
hrvb_lri_1	2.3e-07	NA	1.2e+108	0.99
hrvb_wlri_1	NA	NA	NA	0.4
hrvb_flri_1	NA	NA	NA	0.4
hrvc_uri_1	NA	NA	NA	0.4
hrvc_lri_1	0.68	0.2	1.8	0.48
hrvc_flri_1	0.66	0.037	3.4	0.68
rsv_uri_2	0.75	0.23	2	0.6
rsv_lri_2	1.8	0.42	6.3	0.41
rsv_wlri_2	1.3	0.27	5.2	0.7
rsv_flri_2	4.1	0.7	23	0.1
influ_uri_2	1.7	0.22	9.1	0.57
influ_lri_2	2	0.082	24	0.61
influ_wlri_2	NA	NA	NA	0.4
influ_flri_2	26000000	6.9e-122	NA	0.99
hrva_uri_2	NA	NA	NA	0.4
hrva_lri_2	1.6	0.61	3.7	0.32
hrva_wlri_2	1.7	0.37	6.6	0.47
hrva_flri_2	6.9	1	58	0.046
hrvb_uri_2	NA	NA	NA	0.4
hrvb_lri_2	NA	NA	NA	0.4
hrvb_wlri_2	NA	NA	NA	0.4
hrvb_flri_2	NA	NA	NA	0.4
hrvc_uri_2	NA	NA	NA	0.4
hrvc_lri_2	1.5	0.57	3.9	0.38
hrvc_flri_2	2.8	0.34	19	0.29
rsv_uri_3	1.2	0.42	3.2	0.67
rsv_lri_3	0.67	0.039	3.4	0.69
rsv_wlri_3	2.1e-07	NA	1.8e+71	0.99
rsv_flri_3	3.7	0.13	105	0.39
influ_uri_3	2.5e-07	NA	2e+71	0.99
influ_lri_3	NA	NA	NA	0.4
influ_wlri_3	NA	NA	NA	0.4
influ_flri_3	NA	NA	NA	0.4
hrva_uri_3	NA	NA	NA	0.4
hrva_lri_3	12	2.7	73	0.0027
hrva_wlri_3	9.8	1.7	80	0.015
hrva_flri_3	17	1.8	390	0.023
hrvb_uri_3	NA	NA	NA	0.4
hrvb_lri_3	NA	NA	NA	0.4
hrvb_wlri_3	NA	NA	NA	0.4
hrvb_flri_3	NA	NA	NA	0.4
hrvc_uri_3	NA	NA	NA	0.4
hrvc_lri_3	6.9	2	27	0.0031
hrvc_flri_3	7.1	0.61	164	0.13
totige6m	1	0.65	1.8	0.86
hdmige6m	0.93	0.14	3.6	0.92
catige6m	2.2	0.62	7.6	0.2
pntige6m	1.5	0.54	3.8	0.41
couige6m	1.3	0.3	4.5	0.68
ryeige6m	1.1	0.29	3.4	0.83
mouige6m	2	0.37	9.6	0.37
phinfige6m	1.3	0.65	2.6	0.43
totige1	1.1	0.75	1.6	0.69
hdmige1	0.54	0.039	2.3	0.51
catige1	4	0.54	32	0.16
pntige1	2.2	0.65	6.9	0.19
couige1	0.33	0.01	2.9	0.41
ryeige1	0.17	0.00028	3.4	0.39
mouige1	4.5e-09	NA	2.9e+116	0.99
phinfige1	1.1	0.41	2.8	0.85
totige2	1.7	0.87	4.5	0.18
hdmige2	2	1.2	3.7	0.016
catige2	2.1	0.59	7	0.22
pntige2	3	0.74	12	0.12
couige2	1.1	0.14	6.3	0.9
mouige2	2.2	0.22	17	0.45
phinfige2	2.1	0.81	5.9	0.13
totige3	2	0.71	6	0.2
hdmige3	1.5	0.9	2.4	0.12
catige3	1.4	0.21	6.7	0.66
pntige3	0.53	0.015	3.8	0.61
couige3	6.1e-06	NA	8.1e+54	0.99
ryeige3	2.5	0.49	11	0.23
mouige3	2.1	0.68	7.1	0.18
phinfige3	1.4	0.72	2.8	0.31
totige4	3.8	1.4	13	0.015
hdmige4	1.9	1.2	3.1	0.011
catige4	1.5	0.53	3.9	0.4
pntige4	0.96	0.19	3.2	0.95
couige4	1.6	0.55	4.1	0.34
ryeige4	1.9	0.79	4.4	0.14
mouige4	1.5	0.75	3	0.23
phinfige4	2.4	1.3	4.8	0.01
hdmg4_6m	0.053	NA	6.5e+24	0.99
catg4_6m	0.99	0.67	1.3	0.95
pntg4_6m	NA	NA	NA	0.53
coug4_6m	0.062	NA	1.3e+24	0.99
ryeg4_6m	NA	NA	NA	0.53
moug4_6m	0.034	NA	4.8e+23	0.99
phinfg4_6m	1	0.88	1.2	0.79
hdmg4_1	1.1	0.8	1.5	0.5
catg4_1	0.94	0.78	1.1	0.54
pntg4_1	0.89	0.67	1.1	0.35
coug4_1	1	0.77	1.3	0.81
ryeg4_1	0.043	NA	1.1e+17	0.99
moug4_1	NA	NA	NA	0.4
phinfg4_1	0.73	0.49	0.99	0.057
hdmg4_2	1.1	0.85	1.4	0.61
catg4_2	0.92	0.67	1.3	0.59
pntg4_2	0.96	0.8	1.2	0.64
coug4_2	0.88	0.7	1.1	0.22
ryeg4_2	0.96	0.77	1.2	0.67
moug4_2	0.043	NA	130000000	0.99
phinfg4_2	0.97	0.68	1.6	0.86
hdmg4_3	1.1	0.77	2	0.64
catg4_3	0.9	0.63	1.4	0.59
pntg4_3	1	0.83	1.3	0.87
coug4_3	0.85	0.7	1	0.1
ryeg4_3	0.78	0.59	0.98	0.052
moug4_3	0.027	NA	13000000	0.99
phinfg4_3	0.23	0.071	0.64	0.0076
hdmg4_4	0.89	0.7	1.1	0.33
catg4_4	0.89	0.64	1.3	0.49
pntg4_4	0.91	0.76	1.1	0.35
coug4_4	0.72	0.56	0.91	0.0074
ryeg4_4	0.81	0.6	1	0.12
moug4_4	0.9	0.66	1.2	0.46
phinfg4_4	0.3	0.097	0.85	0.028
hdmigg_1	3.3	0.16	46	0.38
catigg_1	6.5	0.22	150	0.24
grassigg_1	0.57	0.073	2.6	0.52
hdmigg_2	0.97	0.24	3.7	0.96
catigg_2	1.2	0.28	4.3	0.82
grassigg_2	0.59	0.17	1.9	0.38
hdmigg_3	0.48	0.057	2.5	0.43
catigg_3	0.52	0.058	2.7	0.49
grassigg_3	0.39	0.066	1.6	0.23
hiswl6m	0.99	0.44	2.2	0.98
hdmwl6m	0.0028	NA	1.5e+40	0.99
catwl6m	2.6	1.1	7.4	0.046
ryewl6m	NA	NA	NA	0.4
altwl6m	NA	NA	NA	0.4
aspwl6m	1.1	0.13	4.7	0.92
cmwl6m	1	0.71	1.3	0.89
ewwl6m	1	0.87	1.2	0.7
hiswl2	0.53	0.3	0.87	0.018
hdmwl2	1.4	1	1.8	0.03
catwl2	1.7	1	3	0.041
ryewl2	0.54	0.076	1.6	0.37
altwl2	1e-07	NA	3.4e+80	0.99
aspwl2	4.5e-07	NA	4.4e+50	0.99
cmwl2	1	0.46	1.8	0.95
ewwl2	1.1	0.87	1.4	0.38
mat_atopy	1.4	0.36	7.2	0.64
mat_had	0.35	0.083	1.4	0.14
matfh_xast	0.58	0.18	1.9	0.35
pat_atopy	0.97	0.22	5.1	0.96
pat_had	1.1	0.27	4.7	0.92
patfh_xast	0.91	0.33	2.6	0.85
smoke1	1.4	0.35	5.1	0.59
smoke2	0.85	0.12	3.9	0.85
smoke3	0.54	0.076	2.4	0.46
smoke4	0.42	0.021	2.7	0.44
care1	0.27	0.04	1.1	0.097
care2	0.46	0.14	1.4	0.17
care3	0.79	0.28	2.2	0.66
care4	0.49	0.13	2.1	0.31
crcatexp1	0.37	0.098	1.1	0.11
crcatexp2	0.49	0.14	1.4	0.21
crcatexp3	0.23	0.034	0.9	0.063
crcatexp4	0.24	0.035	0.93	0.07
nochdn1	1.2	0.64	2.1	0.55
nochdn2	1.2	0.67	2.1	0.53
nochdn3	1.1	0.56	2.1	0.77
nochdn4	1.3	0.63	2.6	0.48
oldchdbirth	1.1	0.6	2	0.71
oldchd1	1.2	0.64	2.1	0.55
oldchd2	1.2	0.65	2.2	0.51
oldchd3	1.3	0.67	2.3	0.43
oldchd4	1.1	0.58	2	0.72
bthodr	0.87	0.38	1.7	0.71
bas2	0.033	7.6e-06	14	0.34
pDC2	0.099	1.6e-05	219	0.57
mDC2	13	0.019	8700	0.43
pDCmfi2	1	1	1	0.76
mDCmfi2	1	1	1	0.3
trecs1	0.37	0.036	3.3	0.38
ht3	1	0.89	1.2	0.63
ht4	1	0.86	1.2	0.96
wt3	1.1	0.71	1.8	0.58
wt4	0.99	0.69	1.4	0.96
iga6w	0.72	0.074	5.4	0.76
iga6m	0.83	0.11	4.6	0.84
lys6w	2.6	0.0012	6600	0.78
lys6m	107	0.58	320000	0.19
prot6w	1	0.9	1.1	0.97
prot6m	0.97	0.84	1.1	0.62
lact6w	0.92	0.59	1.4	0.71
lact6m	1.5	0.85	2.7	0.16
vitdmat	3.9	0.21	89	0.37
mhdm13_2	1.2	0.73	1.8	0.45
mhdm4_2	1.1	0.9	1.4	0.26
mhdm4r_2	1.2	1	1.5	0.037
mhdm5_2	1.3	0.97	1.7	0.081
mhdm9_2	1	0.82	1.2	0.84
mhdmg_2	1.1	0.9	1.3	0.51
mhdmcish_2	0.96	0.82	1.1	0.52
mhdmdac_2	0.06	NA	3.1e+24	0.99
mhdmplx_2	0.98	0.8	1.2	0.8
hdm5_cd	1.8	0.97	3.5	0.064
pha10_cd	1.1	0.48	5.7	0.84
pha13_cd	4.9	0.86	60	0.16
pha5_cd	1.2	0.59	3.3	0.7
phag_cd	2.6	0.7	13	0.19
pha10_6m	0.97	0.6	1.8	0.91
pha13_6m	1.2	0.66	3.7	0.58
pha5_6m	0.91	0.65	1.3	0.59
phag_6m	1	0.71	1.6	0.84
rsv10_6m	NA	NA	NA	0.31
rsv13_6m	0.038	NA	4.3e+33	0.99
rsv5_6m	0.023	NA	4.1e+27	0.99
rsvg_6m	0.011	NA	2e+22	0.99
tt10_6m	1.2	0.66	2.2	0.46
tt13_6m	1.1	0.8	1.6	0.47
tt5_6m	1	0.67	1.4	0.97
ttg_6m	1.1	0.76	1.5	0.68
lpsg10_1	0.73	0.51	1.1	0.088
lpsg12_1	0.73	0.49	1.1	0.093
rsv10_1	0.014	NA	1e+35	0.99
rsv13_1	0.014	NA	7.3e+36	0.99
rsv5_1	NA	NA	NA	0.24
rsvg_1	0.88	0.36	1.6	0.72
tt10_1	0.75	0.33	1.2	0.35
tt13_1	0.8	0.58	1.1	0.13
tt5_1	0.81	0.58	1.1	0.18
ttg_1	0.81	0.58	1.1	0.2
hdm10_2	0.017	NA	9.5e+33	0.99
hdm13_2	0.79	0.34	1.3	0.46
hdm5_2	0.85	0.36	1.4	0.6
hdmg_2	NA	NA	NA	0.39
pha10_2	1.1	0.55	3.9	0.78
pha13_2	1.7	0.6	11	0.49
pha5_2	0.98	0.59	1.9	0.93
phag_2	0.82	0.37	2.1	0.62
hdm10_3	175	5.6e-36	NA	0.99
hdm13_3	1.3	0.84	1.9	0.21
hdm5_3	2.9	1.5	7.6	0.0064
hdmg_3	1.9	1.1	3.5	0.035
pha10_3	0.87	0.55	1.5	0.56
pha13_3	0.82	0.36	2	0.61
pha5_3	0.69	0.46	1	0.057
phag_3	0.71	0.36	1.2	0.23
ic10_cd	0.72	0.43	1.2	0.18
ic1b_cd	0.87	0.57	1.3	0.5
ic6_cd	0.75	0.53	1	0.084
ic8_cd	0.9	0.68	1.2	0.44
icg_cd	1	0.68	1.6	0.96
icip_cd	1.3	0.61	5	0.57
icmp_cd	0.96	0.65	1.5	0.86
ict_cd	0.59	0.22	1.1	0.16
ic10_4	0.79	0.47	1.4	0.38
ic1b_4	0.94	0.69	1.3	0.68
ic6_4	1.3	0.79	3.4	0.4
ic8_4	1.1	0.93	1.4	0.21
icg_4	1.1	0.63	2.4	0.78
icip_4	0.38	0.11	1.2	0.098
icmp_4	1.4	0.63	5.8	0.57
ict_4	1.5	0.87	3.6	0.2
crez6m	0.97	0.35	2.6	0.95
crez1	1.3	0.43	3.7	0.63
crez2	1.3	0.43	3.9	0.61
crez3	2.3	0.7	7.2	0.16
crez4	1.6	0.5	5.1	0.41
strep_raw_6m	1.4	0.5	4.3	0.54
strep_cn_6m	1.4	0.51	4.3	0.51
strep_raw_6m_20	2.6	0.72	8.7	0.14
strep_cn_6m_20	2.9	0.8	10	0.098
ds_vitd3_cd	8.6	0.26	463	0.25
ds_vitd3_6m	0.84	0.029	36	0.92
ds_vitd3_1	1.5	0.041	74	0.83
ds_vitd3_2	5.3	0.029	1400	0.54
ds_vitd3_3	0.6	0.0015	198	0.86
ds_vitd3_4	5.4	0.029	1200	0.53
vitd3_cd	2.7	0.16	58	0.51
vitd3_6m	0.47	0.021	14	0.65
vitd3_1	2.3	0.075	102	0.65
vitd3_2	8.2	0.079	1400	0.39
vitd3_3	1.6	0.016	160	0.85
vitd3_4	13	0.13	1800	0.29
hdmigg_ige_1	2.1	0.56	13	0.35
hdmigg_ige_2	0.56	0.32	0.93	0.029
hdmigg_ige_3	0.65	0.4	1.1	0.076
catigg_ige_1	0.51	0.075	3.9	0.49
catigg_ige_2	0.63	0.21	1.8	0.39
catigg_ige_3	0.58	0.15	2	0.4
hdmg4_ige_6m	0.82	0.27	1.8	0.67
hdmg4_ige_1	1.1	0.83	1.5	0.43
hdmg4_ige_2	0.95	0.78	1.2	0.62
hdmg4_ige_3	0.93	0.71	1.3	0.59
hdmg4_ige_4	0.79	0.63	0.98	0.034
pntg4_ige_6m	0.67	0.26	1.9	0.41
pntg4_ige_1	0.87	0.65	1.1	0.26
pntg4_ige_2	0.94	0.79	1.1	0.51
pntg4_ige_3	1	0.83	1.3	0.82
pntg4_ige_4	0.92	0.76	1.1	0.35
ryeg4_ige_6m	0.88	0.29	3.5	0.83
ryeg4_ige_1	0.69	0.17	1.2	0.39
ryeg4_ige_3	0.77	0.58	0.97	0.042
ryeg4_ige_4	0.77	0.56	0.99	0.063
coug4_ige_6m	0.72	0.22	1.7	0.54
coug4_ige_1	1	0.79	1.3	0.73
coug4_ige_2	0.88	0.71	1.1	0.23
coug4_ige_3	0.86	0.71	1	0.12
coug4_ige_4	0.72	0.56	0.9	0.0063
moug4_ige_6m	0.49	0.11	1.3	0.31
moug4_ige_1	220000000	3.5e-117	NA	0.99
moug4_ige_2	0.42	0.062	0.95	0.26
moug4_ige_3	0.33	0.061	0.77	0.089
moug4_ige_4	0.82	0.56	1.1	0.23
catg4_ige_6m	0.94	0.64	1.3	0.72
catg4_ige_1	0.93	0.77	1.1	0.47
catg4_ige_2	0.88	0.65	1.2	0.41
catg4_ige_3	0.9	0.64	1.3	0.54
catg4_ige_4	0.86	0.62	1.2	0.35
phinfg4_ige_6m	1	0.86	1.2	0.92
phinfg4_ige_1	0.72	0.5	0.99	0.05
phinfg4_ige_2	0.88	0.63	1.3	0.45
phinfg4_ige_3	0.52	0.29	0.9	0.023
phinfg4_ige_4	0.38	0.2	0.66	0.0013
hdmigg_non_g4_1	3.4	0.16	48	0.37
hdmigg_non_g4_2	1.1	0.27	4.5	0.86
hdmigg_non_g4_3	0.58	0.06	3.3	0.58
catigg_non_g4_1	7.2	0.23	177	0.22
catigg_non_g4_2	1.7	0.39	6.9	0.45
catigg_non_g4_3	0.62	0.038	4.2	0.67
hdmige_035_6m	1.8e-07	NA	1.7e+108	0.99
hdmige_035_1	1.8e-07	NA	4.4e+108	0.99
hdmige_035_2	6.4	1.8	25	0.0052
hdmige_035_3	2.4	0.71	8.1	0.14
hdmige_035_4	2.7	0.83	9.3	0.1
catige_035_6m	4	0.15	110	0.35
catige_035_1	NA	NA	NA	0.4
catige_035_2	1.9	0.084	24	0.61
catige_035_3	9.8e-07	NA	2.2e+122	0.99
catige_035_4	2.8	0.33	20	0.3
pntige_035_6m	1.3	0.064	12	0.8
pntige_035_1	1.4	0.064	12	0.79
pntige_035_2	6.2e-07	NA	3e+122	0.99
pntige_035_3	7.6e-07	NA	3.2e+122	0.99
pntige_035_4	2.4	0.1	28	0.5
couige_035_6m	5.3e-07	NA	8.8e+121	0.99
couige_035_1	NA	NA	NA	0.4
couige_035_2	6.2e-07	NA	3e+122	0.99
couige_035_3	6.2e-07	NA	2.7e+122	0.99
couige_035_4	3.9	0.45	29	0.18
ryeige_035_6m	1.9	0.085	23	0.61
ryeige_035_1	NA	NA	NA	0.4
ryeige_035_2	2.7	0.49	13	0.22
ryeige_035_3	4.4	0.16	118	0.31
ryeige_035_4	1.5	0.2	8.3	0.64
mouige_035_6m	5.3e-07	NA	8.8e+121	0.99
mouige_035_1	NA	NA	NA	0.4
mouige_035_2	30000000	6.2e-122	NA	0.99
mouige_035_3	3.7	0.36	39	0.24
mouige_035_4	2	0.32	12	0.42
phinfige_035_6m	1.3	0.31	4.3	0.73
phinfige_035_1	1.3	0.46	3.7	0.6
phinfige_035_2	2.1	0.72	6.2	0.18
phinfige_035_3	3.2	1	12	0.052
phinfige_035_4	3.9	1.2	15	0.033
totige_100_6m	5.3e-07	NA	8.8e+121	0.99
totige_100_1	1.8e-07	NA	4.8e+108	0.99
totige_100_2	2	0.39	8.9	0.36
totige_100_3	1.2	0.23	4.9	0.81
totige_100_4	4	1.2	15	0.028
hisspt6m	0.88	0.32	2.5	0.81
hisspt2	1.4e-08	NA	1.2e+107	0.99
hdmspt6m	1.8e-07	NA	4.6e+108	0.99
hdmspt2	3	0.77	11	0.1
catspt6m	7.3	0.95	70	0.058
catspt2	5.9	1.5	24	0.0095
ryespt6m	NA	NA	NA	0.4
ryespt2	7.6e-08	NA	6.1e+71	0.99
altspt6m	NA	NA	NA	0.4
altspt2	NA	NA	NA	0.4
aspspt6m	6.6e-07	NA	2.3e+122	0.99
aspspt2	2.3e-07	NA	1.3e+108	0.99
cmspt6m	0.6	0.031	3.9	0.65
cmspt2	1.2	0.058	11	0.86
ewspt6m	0.77	0.11	3.4	0.76
ewspt2	1.5	0.29	6	0.59
sptany6m	1.1	0.28	3.8	0.84
sptany2	2.4	0.86	7	0.094
bmi4	0.92	0.51	1.6	0.76
bmi5	0.97	0.6	1.5	0.88
bmi10	1	0.82	1.3	0.69
slri_1	0.95	0.43	1.9	0.88
slri_2	2.2	1.2	4.3	0.011
slri_3	4.1	1.8	11	0.0028
slri_4	5.1	2.2	16	0.0013
ari_1	1.1	0.87	1.3	0.51
ari_2	1	0.81	1.3	0.82
ari_3	1.1	0.91	1.4	0.3
ari_4	1.2	1	1.5	0.032
flri_1.lri_1	0.97	0.12	6	0.97
flri_2.lri_2	6.1	1.3	35	0.027
flri_1.ari_1	0.72	0.0066	20	0.86
flri_2.ari_2	12	1.2	152	0.041
flri_3.ari_3	172	2.5	58000	0.048
flri_4.ari_4	3.5	0.23	43	0.32
wlri_1.lri_1	0.65	0.085	3.8	0.65
wlri_2.lri_2	0.65	0.14	2.7	0.56
wlri_1.ari_1	1.2	0.014	51	0.94
wlri_2.ari_2	0.79	0.063	6.4	0.83
wlri_3.ari_3	8.7	0.82	103	0.07
wlri_4.ari_4	68	5.2	1900	0.0039
slri_1.lri_1	0.77	0.13	4.1	0.76
slri_2.lri_2	3.3	0.69	21	0.16
slri_1.ari_1	0.53	0.015	9.4	0.69
slri_2.ari_2	4.3	0.65	29	0.12
slri_3.ari_3	19	2.2	229	0.01
slri_4.ari_4	33	3.3	527	0.0057
hrvc_wlri_1	1.5	0.19	7.8	0.68
hrvc_wlri_2	2.8	0.85	13	0.12
hrvc_wlri_3	4	0.92	23	0.077
riskMPGs_0_2	2.6	0.43	16	0.3
riskMPGs_2_4	0.8	0.077	7.5	0.85
healthMPGs_0_2	0.33	0.054	1.8	0.21
healthMPGs_2_4	0.15	0.0096	1.4	0.12
riskMPGs_0_2_quart	1.3	0.72	2.4	0.36
riskMPGs_2_4_quart	1	0.51	2.1	0.9
healthMPGs_0_2_quart	0.72	0.41	1.2	0.23
healthMPGs_2_4_quart	0.63	0.31	1.1	0.16

## Sheet: CAS3
predictor	OR	lower	upper	p_value
uri_1	0.5	0.19	1	0.083
uri_2	0.53	0.17	0.94	0.12
uri_3	0.2	0.0088	0.73	0.11
uri_4	0.43	0.12	0.88	0.07
lri_1	0.48	0.13	1.1	0.16
lri_2	0.99	0.34	2.6	0.98
lri_3	0.98	0.4	2.6	0.96
lri_4	1.9	0.57	8.4	0.32
wlri_1	2.6	0.62	58	0.34
wlri_2	2.4	0.67	16	0.24
wlri_3	1.2	0.43	4.6	0.76
wlri_4	7.1	1.2	169	0.1
flri_1	7.3	0.78	178	0.12
flri_2	1.6	0.48	10	0.5
flri_3	4.2	0.55	519	0.37
flri_4	1.1	0.11	18	0.93
rsv_uri_1	0.26	0.012	2.2	0.25
rsv_lri_1	3.3	0.24	103	0.41
rsv_wlri_1	69000000	8e-131	NA	1
rsv_flri_1	48000000	6.2e-129	NA	1
influ_uri_1	3.5e-09	NA	Inf	1
influ_lri_1	16000000	2.6e-112	NA	1
influ_wlri_1	4800000	6.6e-196	NA	0.99
influ_flri_1	3200000	2.4e-210	NA	1
hrva_uri_1	NA	NA	NA	0.58
hrva_lri_1	0.79	0.23	3.2	0.71
hrva_wlri_1	26000000	3.2e-104	NA	0.99
hrva_flri_1	20000000	2.5e-137	NA	1
hrvb_uri_1	NA	NA	NA	0.58
hrvb_lri_1	9600000000000000	0	NA	1
hrvb_wlri_1	4400000	8.7e-206	NA	0.99
hrvb_flri_1	5500000000000000	0	NA	1
hrvc_uri_1	NA	NA	NA	0.58
hrvc_lri_1	0.38	0.078	1.2	0.15
hrvc_flri_1	19000000	1.8e-180	NA	1
rsv_uri_2	0.0062	1.2e-06	0.42	0.068
rsv_lri_2	0.31	0.0063	14	0.52
rsv_wlri_2	6600000	0	NA	1
rsv_flri_2	0.31	0.0063	14	0.52
influ_uri_2	0.72	0.09	16	0.77
influ_lri_2	11000000	3e-187	NA	1
influ_wlri_2	9800000	3.7e-252	NA	1
influ_flri_2	11000000	3e-187	NA	1
hrva_uri_2	NA	NA	NA	0.46
hrva_lri_2	210000000	2.3e-167	NA	1
hrva_wlri_2	17000000	3.4e-138	NA	1
hrva_flri_2	21000000	1e-128	NA	1
hrvb_uri_2	NA	NA	NA	0.46
hrvb_lri_2	7.9e-10	NA	Inf	1
hrvb_wlri_2	NA	NA	NA	0.46
hrvb_flri_2	7.9e-10	NA	Inf	1
hrvc_uri_2	NA	NA	NA	0.46
hrvc_lri_2	0.74	0.11	4.2	0.72
hrvc_flri_2	11000000	0	NA	1
rsv_uri_3	3100	1.9e-126	NA	1
rsv_lri_3	0.33	0.022	4.1	0.38
rsv_wlri_3	0.26	0.019	3.1	0.27
rsv_flri_3	25000000	2.9e-152	NA	1
influ_uri_3	7.9e-10	NA	Inf	1
influ_lri_3	8300000	0	NA	1
influ_wlri_3	8300000	0	NA	1
influ_flri_3	NA	NA	NA	0.46
hrva_uri_3	NA	NA	NA	0.46
hrva_lri_3	39000000	3.6e-162	NA	1
hrva_wlri_3	5500000	4.5e-126	NA	1
hrva_flri_3	7100	4.1e-170	NA	1
hrvb_uri_3	NA	NA	NA	0.46
hrvb_lri_3	43000000	9.4e-213	NA	1
hrvb_wlri_3	34000000	0	NA	1
hrvb_flri_3	5600000	1e-176	NA	1
hrvc_uri_3	NA	NA	NA	0.46
hrvc_lri_3	1.6	0.21	30	0.67
hrvc_flri_3	23000000	6.3e-153	NA	1
totige6m	1	0.11	8.4	1
hdmige6m	3.4	0.26	177	0.4
catige6m	0.24	0.012	3.2	0.29
pntige6m	1.1	0.3	3.7	0.92
couige6m	0.98	0.048	59	0.99
ryeige6m	1.5	0.073	230	0.82
mouige6m	7300000000000	7.1E-312	NA	1
phinfige6m	2.2	0.66	12	0.25
totige1	0.48	0.052	1.8	0.39
hdmige1	39	2.5	22000	0.082
catige1	0.45	0.053	2.8	0.41
pntige1	0.47	0.095	1.6	0.27
couige1	0.15	0.0058	1.5	0.14
ryeige1	0.23	0.0068	3.2	0.28
mouige1	NA	NA	NA	0.58
phinfige1	1.6	0.23	18	0.67
totige2	0.073	0.0012	2.1	0.15
hdmige2	1.4	0.38	4.8	0.62
catige2	2.2	0.42	26	0.42
pntige2	2	0.51	13	0.37
couige2	25	1.6	1100	0.046
mouige2	2.4	0.04	469	0.7
phinfige2	2.5	0.18	70	0.52
totige3	0.24	0.0034	9.2	0.45
hdmige3	1.5	0.4	5.2	0.55
catige3	1.3	0.29	6.9	0.77
pntige3	3.3	0.94	26	0.13
couige3	2.3	0.57	14	0.29
ryeige3	1.8	0.57	7	0.36
mouige3	18	0.87	7300	0.18
phinfige3	8.4	0.53	383	0.19
totige4	0.16	0.0016	8.4	0.37
hdmige4	1.4	0.31	5.5	0.64
catige4	0.83	0.17	4.4	0.81
pntige4	1.4	0.49	6.5	0.54
couige4	1.9	0.54	10	0.35
ryeige4	1.6	0.47	7.3	0.45
mouige4	1.5	0.13	33	0.77
phinfige4	2.7	0.16	66	0.5
hdmg4_6m	28	1.7e-34	NA	0.99
catg4_6m	24	3.3e-30	NA	1
pntg4_6m	0.9	0.42	1.9	0.76
coug4_6m	19	2.5e-57	NA	1
ryeg4_6m	26	3.4e-63	NA	1
moug4_6m	20	4.1e-58	NA	1
phinfg4_6m	1.4	0.96	2.4	0.12
hdmg4_1	0.9	0.58	1.3	0.6
catg4_1	0.76	0.42	1.2	0.28
pntg4_1	0.96	0.64	1.4	0.84
coug4_1	0.93	0.6	1.4	0.71
ryeg4_1	1.2	0.74	2.1	0.55
moug4_1	25	1.4e-62	NA	1
phinfg4_1	0.83	0.29	1.5	0.64
hdmg4_2	0.4	0.038	1.2	0.26
catg4_2	0.96	0.51	1.6	0.88
pntg4_2	0.89	0.48	1.4	0.65
coug4_2	0.91	0.61	1.3	0.61
ryeg4_2	0.87	0.52	1.3	0.5
moug4_2	26	1.7e-44	NA	0.99
phinfg4_2	1.7	0.93	7.7	0.2
hdmg4_3	0.94	0.19	2.3	0.9
catg4_3	0.86	0.054	13	0.91
pntg4_3	0.68	0.22	1.3	0.37
coug4_3	1.4	0.88	2.2	0.16
ryeg4_3	1.2	0.81	1.9	0.34
moug4_3	46	2.6e-22	NA	0.99
phinfg4_3	1	0.17	7.3	1
hdmg4_4	0.46	0.031	5.4	0.53
catg4_4	0.54	0.011	1.5	0.58
pntg4_4	0.73	0.19	1.4	0.45
coug4_4	0.88	0.24	1.9	0.75
ryeg4_4	1.1	0.71	1.7	0.71
moug4_4	1	0.61	1.6	0.98
phinfg4_4	0.42	0.042	3.2	0.4
hdmigg_1	0.0056	8.4e-06	0.57	0.058
catigg_1	0.0046	1.4e-06	0.9	0.082
grassigg_1	0.5	0.034	8	0.6
hdmigg_2	0.79	0.031	18	0.88
catigg_2	0.16	0.004	3.5	0.26
grassigg_2	0.49	0.025	7.4	0.61
hdmigg_3	3.9	0.26	96	0.34
catigg_3	3.7	0.18	244	0.44
grassigg_3	2.3	0.14	55	0.57
hiswl6m	1.8	0.39	11	0.48
hdmwl6m	0.79	0.17	5.4	0.76
catwl6m	0.92	0.33	4	0.88
ryewl6m	0.89	0.1	17	0.92
altwl6m	160000000000000	0	NA	1
aspwl6m	0.051	0.00064	0.62	0.092
cmwl6m	1	0.67	1.7	0.97
ewwl6m	1.6	1.1	3.4	0.11
hiswl2	0.79	0.43	1.3	0.34
hdmwl2	0.87	0.6	1.2	0.36
catwl2	1	0.56	2	0.99
ryewl2	0.57	0.27	0.94	0.057
altwl2	2100	2.7e-103	NA	0.99
aspwl2	0.45	0.15	1.1	0.1
cmwl2	1.1	0.77	1.6	0.75
ewwl2	1.2	0.96	1.7	0.17
mat_atopy	1.5	0.052	28	0.77
mat_had	3.1e-07	NA	2e+138	1
matfh_xast	1.2	0.041	22	0.9
pat_atopy	5.7	0.16	223	0.3
pat_had	0.17	0.0042	2.7	0.26
patfh_xast	0.35	0.027	3.6	0.38
smoke1	NA	NA	NA	0.58
smoke2	3.2e-09	NA	Inf	1
smoke3	3.2e-09	NA	Inf	1
smoke4	3.2e-09	NA	Inf	1
care1	0.16	0.0059	1.8	0.17
care2	0.25	0.0089	2.9	0.31
care3	0.67	0.027	6.9	0.75
care4	NA	NA	NA	0.58
crcatexp1	0.28	0.022	3.3	0.3
crcatexp2	0.25	0.0087	4.1	0.34
crcatexp3	0.059	0.0011	1.4	0.097
crcatexp4	0.14	0.0045	2.5	0.2
nochdn1	0.49	0.13	1.3	0.2
nochdn2	0.44	0.091	1.3	0.19
nochdn3	0.34	0.028	1.2	0.21
nochdn4	0.38	0.045	1.3	0.2
oldchdbirth	0.49	0.13	1.3	0.2
oldchd1	0.49	0.13	1.3	0.2
oldchd2	0.49	0.13	1.3	0.2
oldchd3	0.49	0.13	1.3	0.2
oldchd4	1.5	0.27	14	0.64
bthodr	0.32	0.044	1.1	0.13
bas2	9.4	2.4e-05	110000000	0.74
pDC2	0	0	Inf	1
mDC2	0	NA	NA	1
pDCmfi2	1	0.99	1	0.6
mDCmfi2	1	0.99	1	0.72
trecs1	22	0.28	8300	0.21
ht3	1.7	1.1	3.5	0.064
ht4	1.3	0.94	2.1	0.15
wt3	5.9	1.3	78	0.062
wt4	1.5	0.77	3.5	0.28
iga6w	21	0.2	82000	0.34
iga6m	5e+125	0	Inf	1
lys6w	7200	2.4e-07	1.6e+20	0.51
lys6m	7.1e+28	49000	2.1e+80	0.099
prot6w	1	0.78	1.3	0.99
prot6m	1	0.82	1.3	0.8
lact6w	1.4	0.37	11	0.65
lact6m	19	1.4	3300	0.084
vitdmat	0.031	4.4e-06	90	0.38
mhdm13_2	0.7	0.31	1.2	0.22
mhdm4_2	1.3	0.85	2.3	0.25
mhdm4r_2	2500	2.4e-90	NA	1
mhdm5_2	1.1	0.78	1.8	0.55
mhdm9_2	1.1	0.76	1.6	0.76
mhdmg_2	0.98	0.62	1.5	0.92
mhdmcish_2	1.2	0.81	2.1	0.49
mhdmdac_2	NA	NA	NA	1
mhdmplx_2	1.4e-80	0	Inf	1
hdm5_cd	31	2.2e-39	NA	1
pha10_cd	31	1.4	14000	0.087
pha13_cd	0.0053	2e-08	3.1	0.23
pha5_cd	3.5	1.1	86	0.11
phag_cd	0.82	0.076	28	0.88
pha10_6m	9.9e-05	5.1e-16	0.84	0.24
pha13_6m	0.44	0.0082	2.2	0.6
pha5_6m	0.9	0.3	2.7	0.84
phag_6m	0.058	8.7e-07	0.76	0.4
rsv10_6m	NA	NA	NA	0.57
rsv13_6m	NA	NA	NA	0.57
rsv5_6m	NA	NA	NA	0.57
rsvg_6m	NA	NA	NA	0.57
tt10_6m	113	1.5e-56	NA	1
tt13_6m	0.061	0.00018	0.56	0.12
tt5_6m	0	0	Inf	0.99
ttg_6m	1.1e-86	0	Inf	1
lpsg10_1	0.79	0.28	1.8	0.59
lpsg12_1	3.6	0.82	46	0.17
rsv10_1	0.37	0.04	1	0.14
rsv13_1	0.0019	NA	2.1e+101	1
rsv5_1	NA	NA	NA	0.55
rsvg_1	0.37	0.035	1.4	0.2
tt10_1	2.5e-14	0	Inf	1
tt13_1	0.78	0.29	1.7	0.55
tt5_1	0.18	3e-05	1.3	0.51
ttg_1	0.00021	5.1e-13	0.53	0.26
hdm10_2	NA	NA	NA	1
hdm13_2	1.1	0.42	3.1	0.87
hdm5_2	178	4.2e-96	NA	1
hdmg_2	NA	NA	NA	1
pha10_2	0.45	6.8e-05	857	0.84
pha13_2	2.3	0.0048	9000	0.79
pha5_2	Inf	0	Inf	1
phag_2	0.74	0.0093	18	0.86
hdm10_3	NA	NA	NA	0.58
hdm13_3	1200000	Inf	Inf	1
hdm5_3	2300000	2.8e-245	Inf	1
hdmg_3	9700000	NA	NA	1
pha10_3	2	0.0076	978	0.79
pha13_3	2.5	NA	NA	0.73
pha5_3	3400	0.007	3.2e+20	0.37
phag_3	0.76	NA	NA	0.68
ic10_cd	7.6e-47	0	0	1
ic1b_cd	1.9e-40	NA	NA	1
ic6_cd	4.7e-10	0	Inf	1
ic8_cd	5.1e-10	0	Inf	1
icg_cd	7.3e-07	0	Inf	1
icip_cd	9.4e+61	0	NA	1
icmp_cd	7.5e-20	NA	NA	1
ict_cd	7.9e-08	0	Inf	1
ic10_4	0.0081	5.5e-07	1.8	0.2
ic1b_4	0.52	NA	3.7	0.72
ic6_4	0.53	0.00025	2.6	0.71
ic8_4	0.79	0.42	1.3	0.37
icg_4	172	2.3	570000	0.066
icip_4	2000	2.1	1300000000	0.13
icmp_4	0.45	4.9e-05	2.6	0.76
ict_4	0.66	0.018	3	0.68
crez6m	1.8e-08	NA	2.3e+124	0.99
crez1	32	1.1	3700	0.072
crez2	3.8	0.29	69	0.31
crez3	1.6	0.13	19	0.7
crez4	1.8	0.15	22	0.63
strep_raw_6m	1.4	0.34	6	0.64
strep_cn_6m	1.4	0.34	5.8	0.65
strep_raw_6m_20	45000000	6.1e-163	NA	1
strep_cn_6m_20	45000000	6.1e-163	NA	1
ds_vitd3_cd	8.9	0.007	49000	0.57
ds_vitd3_6m	19	0.00073	940000	0.56
ds_vitd3_1	0.0022	7.6e-09	39	0.26
ds_vitd3_2	3.9e-21	7.4e-60	4.6e-06	0.11
ds_vitd3_3	0.015	2e-08	349	0.47
ds_vitd3_4	7.7e-06	1.9e-16	35	0.24
vitd3_cd	4	0.0029	11000	0.7
vitd3_6m	1.6	0.00037	4700	0.91
vitd3_1	0.0026	1.2e-09	152	0.32
vitd3_2	1.2e-14	6e-36	0.0001	0.063
vitd3_3	0.061	2.1e-07	1500	0.61
vitd3_4	0.14	3.3e-08	170000	0.77
hdmigg_ige_1	3.3e-05	NA	0.13	0.51
hdmigg_ige_2	0.69	0.19	2.6	0.56
hdmigg_ige_3	0.91	0.24	3.7	0.88
catigg_ige_1	1.1	0.18	7.3	0.91
catigg_ige_2	0.21	0.012	1.4	0.18
catigg_ige_3	1.1	0.27	4.2	0.93
hdmg4_ige_6m	1.4	0.7	6.3	0.47
hdmg4_ige_1	0.67	0.38	1	0.11
hdmg4_ige_2	0.51	0.16	1.1	0.16
hdmg4_ige_3	0.76	0.13	1.8	0.65
hdmg4_ige_4	0.52	0.097	2.3	0.39
pntg4_ige_6m	0.9	0.46	1.7	0.74
pntg4_ige_1	1	0.67	1.6	0.85
pntg4_ige_2	0.78	0.38	1.3	0.4
pntg4_ige_3	0.48	0.11	1	0.17
pntg4_ige_4	0.6	0.13	1.2	0.3
ryeg4_ige_6m	1.7	0.6	19	0.48
ryeg4_ige_1	1.2	0.77	2.4	0.43
ryeg4_ige_3	1.1	0.76	1.8	0.53
ryeg4_ige_4	1	0.64	1.6	0.91
coug4_ige_6m	1.8	0.65	26	0.49
coug4_ige_1	0.98	0.63	1.5	0.92
coug4_ige_2	0.83	0.54	1.2	0.36
coug4_ige_3	1.2	0.8	1.9	0.32
coug4_ige_4	0.74	0.24	1.4	0.47
moug4_ige_6m	1.4	0.59	10	0.53
moug4_ige_1	25	1.4e-62	NA	1
moug4_ige_2	1.3	0.48	27	0.72
moug4_ige_3	1.4	0.76	3.8	0.39
moug4_ige_4	0.98	0.6	1.6	0.94
catg4_ige_6m	3.2	1	65	0.36
catg4_ige_1	0.83	0.5	1.2	0.4
catg4_ige_2	0.9	0.48	1.4	0.69
catg4_ige_3	0.77	0.15	3.2	0.73
catg4_ige_4	0.67	0.084	1.6	0.51
phinfg4_ige_6m	1.4	0.91	2.3	0.16
phinfg4_ige_1	0.75	0.22	1.5	0.54
phinfg4_ige_2	1.5	0.88	4	0.19
phinfg4_ige_3	0.64	0.16	2.3	0.48
phinfg4_ige_4	0.5	0.095	2.1	0.34
hdmigg_non_g4_1	0.0058	8.8e-06	0.59	0.059
hdmigg_non_g4_2	0.77	0.029	23	0.87
hdmigg_non_g4_3	6.3	0.34	328	0.28
catigg_non_g4_1	0.0045	1.4e-06	0.91	0.082
catigg_non_g4_2	0.23	0.0042	14	0.44
catigg_non_g4_3	1.8	0.091	128	0.74
hdmige_035_6m	64000000	1.3e-166	NA	1
hdmige_035_1	3.8e+24	0	Inf	1
hdmige_035_2	2.6	0.085	60	0.53
hdmige_035_3	4e-08	NA	2.4e+108	0.99
hdmige_035_4	4.2e-08	NA	7.7e+117	1
catige_035_6m	0.19	0.0048	6.6	0.32
catige_035_1	0.22	0.0043	8.5	0.39
catige_035_2	1.2	0.097	34	0.89
catige_035_3	0.72	0.037	22	0.82
catige_035_4	0.76	0.049	21	0.85
pntige_035_6m	1	0.095	12	1
pntige_035_1	1.9e-16	0	1.7e+279	1
pntige_035_2	1.9	0.17	23	0.58
pntige_035_3	1.6	0.17	16	0.69
pntige_035_4	1.1	0.077	14	0.96
couige_035_6m	4300000	1.2e-205	NA	0.99
couige_035_1	3.7e-09	NA	Inf	1
couige_035_2	13000000	2.1e-150	NA	1
couige_035_3	2.1	0.18	53	0.58
couige_035_4	4.2	0.32	150	0.31
ryeige_035_6m	4300000	1.2e-205	NA	0.99
ryeige_035_1	3.7e-09	NA	Inf	1
ryeige_035_2	2.2e+23	0	Inf	1
ryeige_035_3	7.8	0.72	284	0.14
ryeige_035_4	3.8	0.26	69	0.32
mouige_035_6m	4300000	1.2e-205	NA	0.99
mouige_035_1	NA	NA	NA	0.58
mouige_035_2	NA	NA	NA	0.58
mouige_035_3	18000000	2e-104	NA	1
mouige_035_4	7500000	6.1e-137	NA	1
phinfige_035_6m	1.5	0.11	21	0.74
phinfige_035_1	NA	NA	NA	0.58
phinfige_035_2	NA	NA	NA	0.58
phinfige_035_3	NA	NA	NA	0.58
phinfige_035_4	NA	NA	NA	0.46
totige_100_6m	22000000	9.1e-162	NA	1
totige_100_1	0.19	0.013	1.8	0.16
totige_100_2	2.8e-16	0	2.7e+273	1
totige_100_3	44000000	7.4e-236	NA	0.99
totige_100_4	4.9e-09	NA	8.3e+145	1
hisspt6m	3.6	0.42	40	0.25
hisspt2	320000000	0	NA	1
hdmspt6m	0.23	0.0018	23	0.51
hdmspt2	2.6	0.085	60	0.53
catspt6m	0.28	0.0063	10	0.44
catspt2	0.99	0.11	9.8	0.99
ryespt6m	5300000	3.9e-163	NA	0.99
ryespt2	0.087	0.0011	1.1	0.12
altspt6m	4800000	6.6e-196	NA	0.99
altspt2	4500000	7.3e-206	NA	0.99
aspspt6m	4.8e-09	NA	1.2e+126	1
aspspt2	0.032	0.00042	0.8	0.059
cmspt6m	0.75	0.068	8.9	0.81
cmspt2	1.8	0.21	18	0.58
ewspt6m	12	1.1	488	0.08
ewspt2	3	0.3	35	0.34
sptany6m	1.7	0.15	18	0.66
sptany2	NA	NA	NA	0.58
bmi4	1.1	0.35	3.6	0.92
bmi5	0.67	0.26	1.6	0.35
bmi10	1	0.57	1.9	0.96
slri_1	8.5	1.3	219	0.088
slri_2	1.6	0.6	5.7	0.38
slri_3	0.99	0.36	3.2	0.99
slri_4	3	0.81	21	0.16
ari_1	0.57	0.29	0.93	0.046
ari_2	0.43	0.077	0.89	0.12
ari_3	0.67	0.36	1	0.1
ari_4	0.63	0.27	1.1	0.15
flri_1.lri_1	923	2.9	54000000	0.098
flri_2.lri_2	27	0.49	37000	0.2
flri_1.ari_1	1700	0.48	620000000	0.13
flri_2.ari_2	29	0.26	1700000	0.32
flri_3.ari_3	1200000	1.4	6.4e+27	0.26
flri_4.ari_4	311	0.1	2200000000000	0.46
wlri_1.lri_1	25	0.29	1100000	0.34
wlri_2.lri_2	42	0.68	14000	0.12
wlri_1.ari_1	31	0.15	14000000	0.42
wlri_2.ari_2	13	0.047	12000	0.39
wlri_3.ari_3	81	0.59	380000	0.15
wlri_4.ari_4	1100	1.9	200000000000	0.18
slri_1.lri_1	367	4.6	12000000	0.068
slri_2.lri_2	113	2	79000	0.054
slri_1.ari_1	3700	2.4	2100000000	0.098
slri_2.ari_2	16	0.2	11000	0.28
slri_3.ari_3	64	0.47	220000	0.17
slri_4.ari_4	717	1.5	7600000000	0.14
hrvc_wlri_1	6000000000000000	0	NA	1
hrvc_wlri_2	1.5	0.24	25	0.68
hrvc_wlri_3	0.96	0.097	20	0.97
riskMPGs_0_2	1.3e+31	NA	NA	1
riskMPGs_2_4	4400	2.1	2500000000000	0.13
healthMPGs_0_2	9.3e-33	NA	NA	1
healthMPGs_2_4	5.6	0.012	19000	0.59
riskMPGs_0_2_quart	37000000000	NA	NA	1
riskMPGs_2_4_quart	Inf	NA	NA	0
healthMPGs_0_2_quart	3.1e-11	NA	NA	1
healthMPGs_2_4_quart	1.5	0.32	11	0.62

## Sheet: All
predictor	OR	lower	upper	p_value
uri_1	1	0.87	1.2	0.77
uri_2	0.94	0.81	1.1	0.39
uri_3	0.85	0.73	0.99	0.039
uri_4	0.96	0.83	1.1	0.59
lri_1	1	0.81	1.2	0.92
lri_2	1.4	1.1	1.7	0.0053
lri_3	2	1.5	2.7	3.8e-06
lri_4	2.5	1.8	3.6	1.5e-07
wlri_1	1.5	0.98	2.3	0.06
wlri_2	1.6	1.2	2.2	0.0056
wlri_3	2.7	1.8	4.2	4.1e-06
wlri_4	3.9	2.5	6.7	5.4e-08
flri_1	1.5	0.93	2.4	0.098
flri_2	2.3	1.4	3.9	0.0012
flri_3	2.4	1.4	4.3	0.0023
flri_4	2.2	1.3	4	0.0059
rsv_uri_1	1	0.49	2	0.97
rsv_lri_1	0.96	0.44	2	0.92
rsv_wlri_1	2.4	0.65	9.1	0.18
rsv_flri_1	1.4	0.45	4.3	0.53
influ_uri_1	1.3	0.5	3.1	0.59
influ_lri_1	1.1	0.3	3.6	0.88
influ_wlri_1	2.9	0.26	65	0.4
influ_flri_1	1.1	0.14	5.9	0.93
hrva_uri_1	NA	NA	NA	0.091
hrva_lri_1	0.91	0.61	1.3	0.61
hrva_wlri_1	1.6	0.68	3.4	0.28
hrva_flri_1	1	0.42	2.4	0.92
hrvb_uri_1	NA	NA	NA	0.091
hrvb_lri_1	1.7	0.39	6.8	0.47
hrvb_wlri_1	3100000	2.4e-72	NA	0.99
hrvb_flri_1	7.5	0.89	157	0.091
hrvc_uri_1	NA	NA	NA	0.091
hrvc_lri_1	0.94	0.59	1.4	0.78
hrvc_flri_1	1.9	0.67	5.2	0.2
rsv_uri_2	0.64	0.27	1.4	0.28
rsv_lri_2	1.3	0.54	2.9	0.56
rsv_wlri_2	1.1	0.37	3.1	0.82
rsv_flri_2	2	0.71	5.7	0.17
influ_uri_2	1.1	0.36	2.8	0.91
influ_lri_2	3.7	0.84	19	0.088
influ_wlri_2	7.4	0.91	154	0.088
influ_flri_2	6.8	0.82	141	0.1
hrva_uri_2	NA	NA	NA	0.081
hrva_lri_2	1.7	0.99	2.9	0.052
hrva_wlri_2	1.9	0.82	4.1	0.13
hrva_flri_2	5.9	1.8	23	0.0051
hrvb_uri_2	NA	NA	NA	0.081
hrvb_lri_2	2.6e-07	NA	2.1e+63	0.99
hrvb_wlri_2	NA	NA	NA	0.081
hrvb_flri_2	2.6e-07	NA	2.1e+63	0.99
hrvc_uri_2	NA	NA	NA	0.081
hrvc_lri_2	1.5	0.93	2.3	0.1
hrvc_flri_2	2.4	0.7	8.7	0.16
rsv_uri_3	1.4	0.71	2.8	0.3
rsv_lri_3	1.3	0.54	3	0.54
rsv_wlri_3	1.4	0.44	4.6	0.53
rsv_flri_3	2	0.54	7.1	0.28
influ_uri_3	0.21	0.011	1.2	0.15
influ_lri_3	6.4	0.78	133	0.11
influ_wlri_3	11000000	1.1e-40	NA	0.98
influ_flri_3	4.6	0.42	101	0.22
hrva_uri_3	NA	NA	NA	0.081
hrva_lri_3	4.1	2.1	8.8	9.1e-05
hrva_wlri_3	10	3.6	37	7.8e-05
hrva_flri_3	4	1.3	15	0.022
hrvb_uri_3	NA	NA	NA	0.081
hrvb_lri_3	7.3	0.85	153	0.097
hrvb_wlri_3	3.4	0.13	92	0.39
hrvb_flri_3	2.2	0.074	65	0.6
hrvc_uri_3	NA	NA	NA	0.081
hrvc_lri_3	2.8	1.5	5.1	0.00085
hrvc_flri_3	6	1.5	30	0.016
totige6m	1.4	1	2	0.043
hdmige6m	2.3	0.99	5.8	0.054
catige6m	2.3	0.96	5.4	0.061
pntige6m	2.3	1.4	3.9	0.0014
couige6m	1.7	0.71	3.9	0.22
ryeige6m	1.8	0.79	3.9	0.15
mouige6m	2.6	0.87	8.2	0.089
phinfige6m	2	1.3	2.9	0.00078
totige1	1.1	0.9	1.4	0.31
hdmige1	2.7	1.5	5	0.00089
catige1	3.5	1.4	9.5	0.0099
pntige1	2.2	1.4	3.6	0.00098
couige1	0.63	0.19	1.7	0.4
ryeige1	0.89	0.25	2.7	0.84
mouige1	0.98	0.064	7.9	0.99
phinfige1	2.1	1.3	3.4	0.0021
totige2	1.5	1.1	2.2	0.037
hdmige2	2	1.5	2.8	2.8e-05
catige2	2.6	1.3	5.5	0.0065
pntige2	2.7	1.6	4.9	0.00046
couige2	2.1	0.99	4.7	0.053
mouige2	1.3	0.35	4.3	0.67
phinfige2	2	1.3	3	0.0012
totige3	2.7	1.6	5	0.00077
hdmige3	1.7	1.3	2.2	0.0001
catige3	2.5	1.3	4.9	0.0065
pntige3	2.6	1.6	4.8	0.00068
couige3	2.5	1.3	5.1	0.0089
ryeige3	2.3	1.4	3.9	0.0016
mouige3	2.3	1.2	4.6	0.01
phinfige3	2	1.4	2.9	8e-05
totige4	3.7	2	7.3	4.2e-05
hdmige4	1.9	1.5	2.5	3.7e-06
catige4	2.4	1.3	4.8	0.006
pntige4	2.1	1.3	3.7	0.006
couige4	2	1.3	3.4	0.0043
ryeige4	2.1	1.4	3.3	0.00074
mouige4	1.5	0.84	2.5	0.17
phinfige4	2.2	1.6	3.2	2.2e-06
hdmg4_6m	1.4	0.88	2.6	0.17
catg4_6m	1.1	0.88	1.3	0.41
pntg4_6m	1.5	0.94	2.6	0.1
coug4_6m	1.3	0.74	2.4	0.32
ryeg4_6m	18	7.5e-14	NA	0.99
moug4_6m	1.1	0.77	1.6	0.48
phinfg4_6m	0.98	0.89	1.1	0.67
hdmg4_1	1.2	1	1.4	0.053
catg4_1	1	0.9	1.1	0.82
pntg4_1	1.1	0.95	1.2	0.22
coug4_1	1.1	0.92	1.3	0.29
ryeg4_1	1.2	0.97	1.5	0.091
moug4_1	18	1e-13	NA	0.99
phinfg4_1	0.93	0.81	1.1	0.35
hdmg4_2	1.1	1	1.3	0.056
catg4_2	1.1	1	1.3	0.053
pntg4_2	1	0.95	1.2	0.37
coug4_2	1	0.88	1.1	0.96
ryeg4_2	1.1	0.92	1.2	0.45
moug4_2	0.75	0.41	1.1	0.19
phinfg4_2	1.1	0.96	1.3	0.2
hdmg4_3	1.1	0.98	1.2	0.1
catg4_3	1.2	1	1.4	0.033
pntg4_3	1.1	0.96	1.2	0.27
coug4_3	1.1	0.96	1.2	0.22
ryeg4_3	1	0.87	1.1	1
moug4_3	0.9	0.72	1.1	0.34
phinfg4_3	1.3	0.96	1.8	0.16
hdmg4_4	1.1	1	1.3	0.034
catg4_4	1.2	1	1.5	0.034
pntg4_4	1.1	0.96	1.2	0.24
coug4_4	1	0.91	1.2	0.69
ryeg4_4	1	0.9	1.2	0.63
moug4_4	1.1	0.91	1.2	0.41
phinfg4_4	1.1	0.88	1.3	0.61
hdmigg_1	2	0.31	11	0.44
catigg_1	1.7	0.11	18	0.68
grassigg_1	1.1	0.41	2.9	0.78
hdmigg_2	1.3	0.6	2.9	0.48
catigg_2	0.87	0.34	2.1	0.75
grassigg_2	0.81	0.38	1.7	0.57
hdmigg_3	2.1	0.89	5	0.089
catigg_3	1.1	0.35	3	0.9
grassigg_3	1.2	0.5	2.7	0.71
hiswl6m	0.87	0.55	1.4	0.54
hdmwl6m	0.99	0.46	1.9	0.97
catwl6m	1.6	0.93	2.8	0.093
ryewl6m	6.4	1.3	119	0.076
altwl6m	2.4	0.72	13	0.18
aspwl6m	1.4	0.59	3.3	0.4
cmwl6m	1.2	0.96	1.4	0.14
ewwl6m	1.1	1	1.3	0.0064
hiswl2	1.1	0.86	1.3	0.6
hdmwl2	1.2	1.1	1.4	0.0032
catwl2	1.5	1.1	2.1	0.0052
ryewl2	1	0.77	1.3	0.85
altwl2	0.35	0.061	1	0.12
aspwl2	0.95	0.56	1.5	0.83
cmwl2	1.3	1.1	1.8	0.023
ewwl2	1.2	1.1	1.4	0.001
mat_atopy	1.1	0.47	2.6	0.87
mat_had	0.42	0.15	1.2	0.097
matfh_xast	0.79	0.38	1.7	0.54
pat_atopy	1.2	0.51	2.8	0.73
pat_had	0.82	0.39	1.7	0.61
patfh_xast	0.73	0.38	1.4	0.32
smoke1	0.92	0.37	2.1	0.85
smoke2	0.76	0.28	1.9	0.56
smoke3	0.3	0.084	0.86	0.04
smoke4	0.3	0.069	0.95	0.066
care1	0.53	0.24	1.1	0.1
care2	0.54	0.27	1.1	0.074
care3	1	0.53	1.9	0.97
care4	1.3	0.49	3.8	0.64
crcatexp1	0.56	0.26	1.1	0.11
crcatexp2	0.5	0.24	1	0.06
crcatexp3	0.3	0.12	0.69	0.0073
crcatexp4	0.33	0.13	0.74	0.01
nochdn1	1.2	0.86	1.7	0.27
nochdn2	1.3	0.95	1.9	0.096
nochdn3	1.1	0.77	1.6	0.55
nochdn4	1.1	0.74	1.5	0.73
oldchdbirth	1.3	0.9	1.8	0.18
oldchd1	1.2	0.86	1.7	0.27
oldchd2	1.3	0.91	1.9	0.14
oldchd3	1.3	0.9	1.8	0.17
oldchd4	1.2	0.86	1.8	0.25
bthodr	1.1	0.72	1.6	0.68
bas2	0.086	0.0011	3.4	0.23
pDC2	0.066	0.0012	1.9	0.15
mDC2	0.31	0.0065	11	0.53
pDCmfi2	1	1	1	0.68
mDCmfi2	1	1	1	0.31
trecs1	1.2	0.32	4.3	0.82
ht3	1	0.92	1.1	0.91
ht4	0.98	0.89	1.1	0.58
wt3	1	0.76	1.3	0.99
wt4	0.97	0.8	1.2	0.75
iga6w	1.5	0.46	4.7	0.51
iga6m	1.3	0.46	3.7	0.6
lys6w	4.8	0.018	2300	0.58
lys6m	8	0.23	714	0.3
prot6w	0.99	0.95	1	0.52
prot6m	1	0.92	1.1	0.93
lact6w	1.1	0.82	1.4	0.6
lact6m	1.2	0.86	1.6	0.29
vitdmat	1.6	0.27	9.8	0.61
mhdm13_2	0.99	0.8	1.2	0.96
mhdm4_2	1.2	1	1.3	0.012
mhdm4r_2	1.1	0.97	1.3	0.11
mhdm5_2	1.2	1	1.3	0.04
mhdm9_2	1	0.91	1.2	0.53
mhdmg_2	1	0.93	1.1	0.63
mhdmcish_2	1	0.92	1.1	0.99
mhdmdac_2	0.066	NA	270000000000000	0.99
mhdmplx_2	0.99	0.88	1.1	0.79
hdm5_cd	1.1	0.76	1.4	0.72
pha10_cd	1.5	0.83	3.1	0.24
pha13_cd	1.4	0.79	3.3	0.34
pha5_cd	1.1	0.86	1.5	0.42
phag_cd	1.3	0.83	2.1	0.33
pha10_6m	1.1	0.76	1.6	0.76
pha13_6m	1.2	0.84	2.1	0.33
pha5_6m	1	0.84	1.3	0.74
phag_6m	0.88	0.71	1.1	0.23
rsv10_6m	NA	NA	NA	0.016
rsv13_6m	0.024	NA	5e+33	0.99
rsv5_6m	0.012	NA	2.4e+19	0.99
rsvg_6m	0.015	NA	26000000000	0.99
tt10_6m	1.2	0.77	1.7	0.43
tt13_6m	0.97	0.79	1.2	0.73
tt5_6m	0.99	0.79	1.2	0.9
ttg_6m	0.9	0.74	1.1	0.29
lpsg10_1	0.87	0.7	1.1	0.2
lpsg12_1	1	0.76	1.3	0.99
rsv10_1	0.89	0.38	1.6	0.71
rsv13_1	0.97	0.41	1.8	0.93
rsv5_1	104	3.8e-22	NA	0.99
rsvg_1	0.96	0.6	1.4	0.83
tt10_1	0.85	0.55	1.2	0.38
tt13_1	0.99	0.83	1.2	0.93
tt5_1	1	0.87	1.3	0.66
ttg_1	0.86	0.71	1	0.12
hdm10_2	0.012	NA	2e+18	0.99
hdm13_2	1.1	0.86	1.5	0.36
hdm5_2	1.1	0.72	1.6	0.73
hdmg_2	0.039	NA	1.2e+17	0.99
pha10_2	1.2	0.6	3.2	0.68
pha13_2	1.7	0.74	5.3	0.31
pha5_2	1.4	0.94	2.5	0.15
phag_2	0.69	0.35	1.3	0.24
hdm10_3	168	4.6e-36	NA	0.99
hdm13_3	1.3	1	1.7	0.018
hdm5_3	2.2	1.5	3.7	0.00026
hdmg_3	1.3	0.98	1.8	0.068
pha10_3	0.89	0.67	1.2	0.45
pha13_3	0.93	0.48	1.8	0.82
pha5_3	0.9	0.68	1.2	0.47
phag_3	0.76	0.52	1.1	0.13
ic10_cd	1	0.77	1.3	0.99
ic1b_cd	1	0.81	1.3	0.9
ic6_cd	0.94	0.78	1.1	0.55
ic8_cd	0.97	0.83	1.1	0.66
icg_cd	0.93	0.74	1.2	0.48
icip_cd	0.98	0.59	1.8	0.95
icmp_cd	0.97	0.77	1.2	0.83
ict_cd	0.94	0.68	1.3	0.69
ic10_4	1	0.75	1.5	0.79
ic1b_4	1.1	0.9	1.3	0.39
ic6_4	1.3	0.97	2	0.13
ic8_4	1.1	0.98	1.3	0.11
icg_4	1.4	0.92	2.4	0.17
icip_4	0.8	0.48	1.3	0.37
icmp_4	1.3	0.87	2.2	0.31
ict_4	1.3	0.95	1.9	0.12
crez6m	1.1	0.57	2.1	0.81
crez1	2.3	1.2	4.3	0.014
crez2	1.6	0.84	3.1	0.15
crez3	2	1	3.9	0.047
crez4	1.7	0.87	3.5	0.12
strep_raw_6m	1.6	0.93	2.9	0.1
strep_cn_6m	1.6	0.93	2.9	0.1
strep_raw_6m_20	2.1	0.83	5.3	0.11
strep_cn_6m_20	2.5	0.94	6.3	0.062
ds_vitd3_cd	2.1	0.32	15	0.44
ds_vitd3_6m	0.17	0.018	1.5	0.11
ds_vitd3_1	0.81	0.076	9	0.86
ds_vitd3_2	0.21	0.014	3.1	0.25
ds_vitd3_3	0.46	0.049	4.7	0.49
ds_vitd3_4	0.58	0.026	13	0.72
vitd3_cd	1.9	0.36	11	0.45
vitd3_6m	0.17	0.023	1.1	0.066
vitd3_1	0.72	0.082	6.7	0.77
vitd3_2	0.29	0.021	3.9	0.35
vitd3_3	0.54	0.053	5.7	0.6
vitd3_4	1.2	0.074	21	0.88
hdmigg_ige_1	0.43	0.24	0.71	0.0021
hdmigg_ige_2	0.51	0.37	0.71	6.6e-05
hdmigg_ige_3	0.57	0.42	0.76	0.00018
catigg_ige_1	0.32	0.12	0.8	0.017
catigg_ige_2	0.44	0.23	0.81	0.01
catigg_ige_3	0.48	0.26	0.86	0.015
hdmg4_ige_6m	1.1	0.69	1.6	0.71
hdmg4_ige_1	1.1	0.87	1.3	0.54
hdmg4_ige_2	1	0.9	1.2	0.75
hdmg4_ige_3	0.99	0.88	1.1	0.9
hdmg4_ige_4	0.99	0.88	1.1	0.91
pntg4_ige_6m	0.77	0.49	1.2	0.24
pntg4_ige_1	1	0.86	1.2	0.87
pntg4_ige_2	1	0.9	1.1	0.92
pntg4_ige_3	1	0.91	1.1	0.77
pntg4_ige_4	1	0.92	1.1	0.59
ryeg4_ige_6m	1	0.56	1.9	0.87
ryeg4_ige_1	1.2	0.98	1.6	0.078
ryeg4_ige_3	0.94	0.81	1.1	0.37
ryeg4_ige_4	0.95	0.81	1.1	0.48
coug4_ige_6m	1	0.6	1.7	0.84
coug4_ige_1	1.1	0.93	1.3	0.22
coug4_ige_2	0.98	0.86	1.1	0.79
coug4_ige_3	1	0.94	1.2	0.44
coug4_ige_4	0.98	0.88	1.1	0.76
moug4_ige_6m	1	0.68	1.4	0.91
moug4_ige_1	1.9	0.85	19	0.27
moug4_ige_2	0.76	0.46	1.1	0.17
moug4_ige_3	0.83	0.65	1	0.098
moug4_ige_4	1	0.88	1.2	0.66
catg4_ige_6m	1	0.84	1.3	0.72
catg4_ige_1	0.99	0.87	1.1	0.9
catg4_ige_2	1.1	0.97	1.3	0.15
catg4_ige_3	1.1	0.98	1.3	0.12
catg4_ige_4	1.1	0.97	1.4	0.12
phinfg4_ige_6m	0.93	0.84	1	0.18
phinfg4_ige_1	0.86	0.74	1	0.044
phinfg4_ige_2	1	0.89	1.2	0.87
phinfg4_ige_3	0.89	0.74	1.1	0.25
phinfg4_ige_4	0.78	0.64	0.94	0.0099
hdmigg_non_g4_1	2	0.32	11	0.43
hdmigg_non_g4_2	1.2	0.54	2.8	0.6
hdmigg_non_g4_3	2.2	0.85	5.7	0.1
catigg_non_g4_1	1.7	0.11	19	0.66
catigg_non_g4_2	0.95	0.34	2.4	0.91
catigg_non_g4_3	0.98	0.25	3.3	0.97
hdmige_035_6m	2.9	0.43	24	0.27
hdmige_035_1	14	3.4	95	0.0011
hdmige_035_2	5.7	2.6	13	2.8e-05
hdmige_035_3	3.7	1.8	7.8	0.00037
hdmige_035_4	3.2	1.6	6.5	0.0013
catige_035_6m	1.8	0.22	12	0.54
catige_035_1	5	0.45	113	0.2
catige_035_2	4.3	0.97	23	0.059
catige_035_3	3.3	0.79	14	0.1
catige_035_4	3.9	1	17	0.048
pntige_035_6m	2.7	0.91	8	0.07
pntige_035_1	3.6	1.4	9.1	0.0065
pntige_035_2	5.9	2	20	0.002
pntige_035_3	3.6	1.2	12	0.027
pntige_035_4	5	1.6	17	0.0065
couige_035_6m	1.3	0.057	16	0.83
couige_035_1	6.9e-07	NA	8.9e+71	0.99
couige_035_2	1.8	0.2	16	0.57
couige_035_3	5.7	1.4	28	0.018
couige_035_4	6	2.1	18	0.001
ryeige_035_6m	1.7	0.21	12	0.57
ryeige_035_1	6.9e-07	NA	8.9e+71	0.99
ryeige_035_2	2.1	0.83	5.3	0.11
ryeige_035_3	7.6	2.6	26	0.00051
ryeige_035_4	3.9	1.6	9.9	0.003
mouige_035_6m	2	0.073	56	0.64
mouige_035_1	NA	NA	NA	0.1
mouige_035_2	3.8	0.14	103	0.37
mouige_035_3	2.3	0.68	8	0.17
mouige_035_4	1.9	0.49	7	0.34
phinfige_035_6m	3.2	1.5	6.9	0.0028
phinfige_035_1	1.9	0.99	3.7	0.053
phinfige_035_2	2.1	1.1	4.1	0.024
phinfige_035_3	3.6	1.9	7.3	0.00022
phinfige_035_4	3.3	1.6	6.6	0.00087
totige_100_6m	4.6	0.39	109	0.24
totige_100_1	1.8	0.41	7.1	0.42
totige_100_2	2.6	1.1	5.7	0.022
totige_100_3	3.3	1.5	7.4	0.0037
totige_100_4	4.4	2.1	9.4	0.00014
hisspt6m	0.81	0.42	1.6	0.53
hisspt2	0.86	0.26	3.4	0.82
hdmspt6m	1.2	0.15	6.7	0.86
hdmspt2	2.9	1.4	6.1	0.0054
catspt6m	2.5	0.57	11	0.2
catspt2	4.3	1.9	10	0.00076
ryespt6m	7300000	5.8e-72	NA	0.99
ryespt2	1.1	0.39	2.6	0.92
altspt6m	4.7	0.41	108	0.23
altspt2	0.64	0.031	5.5	0.71
aspspt6m	2.4	0.28	16	0.38
aspspt2	1	0.26	3.3	1
cmspt6m	2.2	0.75	6	0.14
cmspt2	3.8	1.5	9.7	0.0039
ewspt6m	2.4	1	5.6	0.038
ewspt2	3.5	1.5	8.2	0.0038
sptany6m	1.8	0.83	3.7	0.13
sptany2	2.6	1.3	5	0.0046
bmi4	1	0.76	1.4	0.83
bmi5	0.91	0.69	1.2	0.5
bmi10	1.1	0.91	1.2	0.42
slri_1	1.5	1.1	2.2	0.02
slri_2	1.7	1.3	2.2	0.00052
slri_3	2.6	1.8	4	1.2e-06
slri_4	3.4	2.2	5.5	9.3e-08
ari_1	1	0.89	1.2	0.76
ari_2	1	0.93	1.2	0.44
ari_3	1	0.93	1.2	0.48
ari_4	1.2	1	1.3	0.013
flri_1.lri_1	3.6	1.3	10	0.017
flri_2.lri_2	3.2	1.2	8.7	0.02
flri_1.ari_1	9.7	1.1	85	0.036
flri_2.ari_2	12	2.6	66	0.0021
flri_3.ari_3	13	2.3	96	0.0054
flri_4.ari_4	10	2	61	0.0065
wlri_1.lri_1	1.9	0.73	5	0.18
wlri_2.lri_2	1.3	0.49	3.4	0.62
wlri_1.ari_1	4.3	0.84	22	0.077
wlri_2.ari_2	2	0.45	8.6	0.35
wlri_3.ari_3	18	4.8	78	4e-05
wlri_4.ari_4	41	11	193	4.7e-07
slri_1.lri_1	3.8	1.5	10	0.007
slri_2.lri_2	4.3	1.4	15	0.013
slri_1.ari_1	5	1.2	21	0.026
slri_2.ari_2	5.5	1.6	19	0.0062
slri_3.ari_3	19	5.5	77	9.9e-06
slri_4.ari_4	38	11	164	1.6e-07
hrvc_wlri_1	1.8	0.83	4.1	0.13
hrvc_wlri_2	2.4	1.2	5.1	0.015
hrvc_wlri_3	2.6	1.3	5.4	0.0057
riskMPGs_0_2	2.3	0.79	6.7	0.13
riskMPGs_2_4	0.49	0.14	1.6	0.24
healthMPGs_0_2	0.45	0.14	1.4	0.17
healthMPGs_2_4	1.3	0.36	4.9	0.65
riskMPGs_0_2_quart	1.3	0.89	1.8	0.19
riskMPGs_2_4_quart	0.8	0.53	1.2	0.24
healthMPGs_0_2_quart	0.82	0.58	1.2	0.27
healthMPGs_2_4_quart	1.1	0.75	1.5	0.7

## Sheet: key
variable	definition
sex	gender or sex
mat_atopy	derived maternal history of atopy defined by skin prick test
mat_had	derived maternal history of atopic disease dr diagnosed
mat_ast	derived maternal history of asthma dr diagnosed
matfh_xast	derived maternal history of allergic disease excluding asthma
pat_atopy	derived paternal history of atopy defined by skin prick test
pat_had	derived paternal history of atopic disease dr diagnosed
pat_ast	derived paternal history of asthma dr diagnosed
patfh_xast	derived paternal history of allergic disease excluding asthma
crwz1	Parent opinion on whether the child had wheezed in the last 12 months at the 12 month questionnaire
crwz2	Parent opinion on whether the child had wheezed in the last 12 months at the 2 year questionnaire.
crwz3	Parent opinion on whether the child had wheezed in the last 12 months at the 3 year questionnaire.
crwz4	Parent opinion on whether the child had wheezed in the last 12 months at the 4 year questionnaire.
crwz5	Parent opinion on whether the child had wheezed in the last 12 months at the 5 year questionnaire.
crwz10	Parent opinion on whether the child had wheezed in the last 12 months at the 10 year questionnaire.
cras_3	Current asthma at 3 years defined as positive for wheeze in last 12 months and Dr diagnosed with asthma at or beyond 2nd birthday
cras_4	Current asthma at 4 years defined as positive for wheeze in last 12 months and Dr diagnosed with asthma at or beyond 2nd birthday
cras_5	Current asthma at 5 years defined as positive for wheeze in last 12 months and Dr diagnosed with asthma at or beyond 2nd birthday
cras_10	Current asthma at 10 years defined as positive for wheeze in last 12 months and Dr diagnosed with asthma at or beyond 2nd birthday
arc5	Allergic rhinitis/conjunctivitis/rhinoconjunctivitis in the last 5 years?
crez6m	Dr diagnosis of eczema or atopic dermatitis experienced by the child in the last 6 months at the 6 mo visit.
crez1	Dr diagnosis of eczema or atopic dermatitis experienced by the child in the last 12 months at the 12 month visit.
crez2	Dr diagnosis of eczema or atopic dermatitis experienced by the child in the last 12 months at the 2 year visit.
crez3	Dr diagnosis of eczema or atopic dermatitis experienced by the child in the last 12 months at the 3 year visit.
crez4	Dr diagnosis of eczema or atopic dermatitis experienced by the child in the last 12 months at the 4 year visit.
crez5	Dr diagnosis of eczema or atopic dermatitis experienced by the child in the last 12 months at the 5 year visit.
smoke1	Child exposed to cigarette smoke in last 12 mo at 1 year.
smoke2	Child exposed to cigarette smoke in last 12 mo at 2 years.
smoke3	Child exposed to cigarette smoke in last 12 mo at 3 years.
smoke4	Child exposed to cigarette smoke in last 12 mo at 4 years.
smoke5	Child exposed to cigarette smoke in last 12 mo at 5 years.
smoke10	Child exposed to cigarette smoke in last 12 mo at 10 years.
care1	Attended childcare in last 12 months at 1 year.
care2	Attended childcare in last 12 months at 2 year.
care3	Attended childcare in last 12 months at 3 year.
care4	Attended childcare in last 12 months at 4 year.
crcatexp1	Child exposed to cat in the house, childcare or playgroup in last 12 mo at 1 year.
crcatexp2	Child exposed to cat in the house, childcare or playgroup in last 12 mo at 2 years.
crcatexp3	Child exposed to cat in the house, childcare or playgroup in last 12 mo at 3 years.
crcatexp4	Child exposed to cat in the house, childcare or playgroup in last 12 mo at 4 years.
crcatexp5	Child exposed to cat in the house, childcare or playgroup in last 12 mo at 5 years.
crcatexp10	Child exposed to cat in the house, childcare or playgroup in last 12 mo at 10 years.
crdogexp10	Child exposed to dog in the house, childcare or playgroup in last 12 mo at 10 years.
crfurpet10	Child exposed to furred pet in the house, childcare or playgroup in last 12 mo at 10 years.
ht3	height in cm at 3 years
ht4	height in cm at 4 years
ht5	height in cm at 5 years
ht10	height in m at 10 years
wt3	weight in kg at 3 years
wt4	weight in kg at 4 years
wt5	weight in kg at 5 years
wt10	weight in kg at 10 years
bmi3	Body Mass Index at 3 years
bmi4	Body Mass Index at 4 years
bmi5	Body Mass Index at 5 years
bmi10	Body Mass Index at 10 years
nochdn1	Number of children under 16 yrs of age living in the home at 1 yr.
nochdn2	Number of children under 16 yrs of age living in the home at 2 yrs.
nochdn3	Number of children under 16 yrs of age living in the home at 3 yrs.
nochdn4	Number of children under 16 yrs of age living in the home at 4 yrs.
nochdn5	Number of children under 16 yrs of age living in the home at 5 yrs.
nochdn10	Number of children under 16 yrs of age living in the home at 10 yrs.
oldchdbirth	Number of children older than the proband living in the house at birth
oldchd1	Number of children older than the proband living in the house at age 1 year
oldchd2	Number of children older than the proband living in the house at age 2 yrs
oldchd3	Number of children older than the proband living in the house at age 3 yrs
oldchd4	Number of children older than the proband living in the house at age 4 yrs
oldchd5	Number of children older than the proband living in the house at age 5 yrs
oldchd10	Number of children older than the proband living in the house at age 10 yrs
vitdmat	25-Hydroxy Vitamin D (nmol/L) in mothers’s serum at 6 weeks postpartum
vitd3_cd	25-Hydroxy Vitamin D (nmol/L) in cord serum
vitd3_6m	25-Hydroxy Vitamin D (nmol/L) in serum at 6 months of age
vitd3_1	25-Hydroxy Vitamin D (nmol/L) in serum at 1 year of age
vitd3_2	25-Hydroxy Vitamin D (nmol/L) in serum at 2 yrs of age
vitd3_3	25-Hydroxy Vitamin D (nmol/L) in serum at 3 yrs of age
vitd3_4	25-Hydroxy Vitamin D (nmol/L) in serum at 4 yrs of age
vitd3_5	25-Hydroxy Vitamin D (nmol/L) in serum at 5 yrs of age
vitd3_10	25-Hydroxy Vitamin D (nmol/L) in serum at 6 yrs of age
ds_vitd3_cd	25-Hydroxy Vitamin D (nmol/L) in cord serum (deseasonalised)
ds_vitd3_6m	25-Hydroxy Vitamin D (nmol/L) in serum at 6 months of age (deseasonalised)
ds_vitd3_1	25-Hydroxy Vitamin D (nmol/L) in serum at 1 year of age (deseasonalised)
ds_vitd3_2	25-Hydroxy Vitamin D (nmol/L) in serum at 2 yrs of age (deseasonalised)
ds_vitd3_3	25-Hydroxy Vitamin D (nmol/L) in serum at 3 yrs of age (deseasonalised)
ds_vitd3_4	25-Hydroxy Vitamin D (nmol/L) in serum at 4 yrs of age (deseasonalised)
ds_vitd3_5	25-Hydroxy Vitamin D (nmol/L) in serum at 5 yrs of age (deseasonalised)
ds_vitd3_10	25-Hydroxy Vitamin D (nmol/L) in serum at 6 yrs of age (deseasonalised)
totige6m	Total IgE at 6 months. Continuous kU/L.
totige1	Total IgE at 1 year. Continuous kU/L.
totige2	Total IgE at 2 years. Continuous kU/L.
totige3	Total IgE at 3 years. Continuous kU/L.
totige4	Total IgE at 4 years. Continuous kU/L.
totige5	Total IgE at 5 years. Continuous kU/L.
totige10	Total IgE at 10 years. Continuous kU/L.
hdmige6m	IgE to HDM at 6 months. Continuous kU/L
hdmige1	IgE to HDM at 1 year. Continuous kU/L
hdmige2	IgE to HDM at 2 years. Continuous kU/L
hdmige3	IgE to HDM at 3 years. Continuous kU/L
hdmige4	IgE to HDM at 4 years. Continuous kU/L
hdmige5	IgE to HDM at 5 years. Continuous kU/L
hdmige10	IgE to HDM at 10 years. Continuous kU/L
hdmigg_1	IgG to Der p1 at 1 year. Continuous mg/L
hdmigg_2	IgG to Der p1 at 2 years. Continuous mg/L
hdmigg_3	IgG to Der p1 at 3 years. Continuous mg/L
hdmigg_5	IgG to Der p1 at 5 years. Continuous mg/L
hdmigg_10	IgG to Der p1 at 10 years. Continuous mg/L
hdmg4_6m	IgG4 to HDM at 6 months. Continuous µg/L
hdmg4_1	IgG4 to HDM at 1 year. Continuous µg/L
hdmg4_2	IgG4 to HDM at 2 years. Continuous µg/L
hdmg4_3	IgG4 to HDM at 3 years. Continuous µg/L
hdmg4_4	IgG4 to HDM at 4 years. Continuous µg/L
hdmg4_5	IgG4 to HDM at 5 years. Continuous µg/L
hdmigg_non_g4_1	IgG to HDM minus IgG4 to HDM at 1 year. Continuous mg/L
hdmigg_non_g4_2	IgG to HDM minus IgG4 to HDM at 2 years. Continuous mg/L
hdmigg_non_g4_3	IgG to HDM minus IgG4 to HDM at 3 years. Continuous mg/L
hdmigg_non_g4_5	IgG to HDM minus IgG4 to HDM at 5 years. Continuous mg/L
hdmigg_ige_1	HDM IgG:IgE ratio at 1 year
hdmigg_ige_2	HDM IgG:IgE ratio at 2 years
hdmigg_ige_3	HDM IgG:IgE ratio at 3 years
hdmigg_ige_5	HDM IgG:IgE ratio at 5 years
hdmigg_ige_10	HDM IgG:IgE ratio at 10 years
hdmg4_ige_6m	HDM IgG4:IgE ratio at 6 months
hdmg4_ige_1	HDM IgG4:IgE ratio at 1 year
hdmg4_ige_2	HDM IgG4:IgE ratio at 2 years
hdmg4_ige_3	HDM IgG4:IgE ratio at 3 years
hdmg4_ige_4	HDM IgG4:IgE ratio at 4 years
hdmg4_ige_5	HDM IgG4:IgE ratio at 5 years
catige6m	IgE to cat epithelium and dander at 6 months. Continuous kU/L
catige1	IgE to cat epithelium and dander at 1 year. Continuous kU/L
catige2	IgE to cat epithelium and dander at 2 years. Continuous kU/L
catige3	IgE to cat epithelium and dander at 3 years. Continuous kU/L
catige4	IgE to cat epithelium and dander at 4 years. Continuous kU/L
catige5	IgE to cat epithelium and dander at 5 years. Continuous kU/L
catige10	IgE to cat epithelium and dander at 10 years. Continuous kU/L
catigg_1	IgG to rfel d1 at 1 year. Continuous mg/L
catigg_2	IgG to rfel d1 at 2 years. Continuous mg/L
catigg_3	IgG to rfel d1 at 3 years. Continuous mg/L
catigg_5	IgG to rfel d1 at 5 years. Continuous mg/L
catigg_10	IgG to rfel d1 at 10 years. Continuous mg/L
catg4_6m	IgG4 to cat at 6 months. Continuous µg/L
catg4_1	IgG4 to cat at 1 year. Continuous µg/L
catg4_2	IgG4 to cat at 2 years. Continuous µg/L
catg4_3	IgG4 to cat at 3 years. Continuous µg/L
catg4_4	IgG4 to cat at 4 years. Continuous µg/L
catg4_5	IgG4 to cat at 5 years. Continuous µg/L
catigg_non_g4_1	IgG to cat minus IgG4 to cat at 1 year. Continuous mg/L
catigg_non_g4_2	IgG to cat minus IgG4 to cat at 2 years. Continuous mg/L
catigg_non_g4_3	IgG to cat minus IgG4 to cat at 3 years. Continuous mg/L
catigg_non_g4_5	IgG to cat minus IgG4 to cat at 5 years. Continuous mg/L
catigg_ige_1	cat IgG:IgE ratio at 1 year
catigg_ige_2	cat IgG:IgE ratio at 2 years
catigg_ige_3	cat IgG:IgE ratio at 3 years
catigg_ige_5	cat IgG:IgE ratio at 5 years
catigg_ige_10	cat IgG:IgE ratio at 10 years
catg4_ige_6m	cat IgG4:IgE ratio at 6 months
catg4_ige_1	cat IgG4:IgE ratio at 1 year
catg4_ige_2	cat IgG4:IgE ratio at 2 years
catg4_ige_3	cat IgG4:IgE ratio at 3 years
catg4_ige_4	cat IgG4:IgE ratio at 4 years
catg4_ige_5	cat IgG4:IgE ratio at 5 years
pntige6m	IgE to peanut at 6 months. Continuous kU/L
pntige1	IgE to peanut at 1 year. Continuous kU/L
pntige2	IgE to peanut at 2 years. Continuous kU/L
pntige3	IgE to peanut at 3 years. Continuous kU/L
pntige4	IgE to peanut at 4 years. Continuous kU/L
pntige5	IgE to peanut at 5 years. Continuous kU/L
pntige10	IgE to peanut at 10 years. Continuous kU/L
pntg4_6m	IgG4 to peanut at 6 months. Continuous µg/L
pntg4_1	IgG4 to peanut at 1 year. Continuous µg/L
pntg4_2	IgG4 to peanut at 2 years. Continuous µg/L
pntg4_3	IgG4 to peanut at 3 years. Continuous µg/L
pntg4_4	IgG4 to peanut at 4 years. Continuous µg/L
pntg4_5	IgG4 to peanut at 5 years. Continuous µg/L
pntg4_ige_6m	peanut IgG4:IgE ratio at 6 months
pntg4_ige_1	peanut IgG4:IgE ratio at 1 year
pntg4_ige_2	peanut IgG4:IgE ratio at 2 years
pntg4_ige_3	peanut IgG4:IgE ratio at 3 years
pntg4_ige_4	peanut IgG4:IgE ratio at 4 years
pntg4_ige_5	peanut IgG4:IgE ratio at 5 years
couige6m	IgE to couch grass at 6 months. Continuous kU/L
couige1	IgE to couch grass at 1 year. Continuous kU/L
couige2	IgE to couch grass at 2 years. Continuous kU/L
couige3	IgE to couch grass at 3 years. Continuous kU/L
couige4	IgE to couch grass at 4 years. Continuous kU/L
couige5	IgE to couch grass at 5 years. Continuous kU/L
couige10	IgE to couch grass at 10 years. Continuous kU/L
coug4_6m	IgG4 to couch grass at 6 months. Continuous µg/L
coug4_1	IgG4 to couch grass at 1 year. Continuous µg/L
coug4_2	IgG4 to couch grass at 2 years. Continuous µg/L
coug4_3	IgG4 to couch grass at 3 years. Continuous µg/L
coug4_4	IgG4 to couch grass at 4 years. Continuous µg/L
coug4_5	IgG4 to couch grass at 5 years. Continuous µg/L
coug4_ige_6m	couch grass IgG4:IgE ratio at 6 months
coug4_ige_1	couch grass IgG4:IgE ratio at 1 year
coug4_ige_2	couch grass IgG4:IgE ratio at 2 years
coug4_ige_3	couch grass IgG4:IgE ratio at 3 years
coug4_ige_4	couch grass IgG4:IgE ratio at 4 years
coug4_ige_5	couch grass IgG4:IgE ratio at 5 years
ryeige6m	IgE to ryegrass at 6 months. Continuous kU/L
ryeige1	IgE to ryegrass at 1 year. Continuous kU/L
ryeige3	IgE to ryegrass at 3 years. Continuous kU/L
ryeige4	IgE to ryegrass at 4 years. Continuous kU/L
ryeige5	IgE to ryegrass at 5 years. Continuous kU/L
ryeige10	IgE to ryegrass at 10 years. Continuous kU/L
ryeg4_6m	IgG4 to ryegrass at 6 months. Continuous µg/L
ryeg4_1	IgG4 to ryegrass at 1 year. Continuous µg/L
ryeg4_2	IgG4 to ryegrass at 2 years. Continuous µg/L
ryeg4_3	IgG4 to ryegrass at 3 years. Continuous µg/L
ryeg4_4	IgG4 to ryegrass at 4 years. Continuous µg/L
ryeg4_5	IgG4 to ryegrass at 5 years. Continuous µg/L
ryeg4_ige_6m	ryegrass IgG4:IgE ratio at 6 months
ryeg4_ige_1	ryegrass IgG4:IgE ratio at 1 year
ryeg4_ige_3	ryegrass IgG4:IgE ratio at 3 years
ryeg4_ige_4	ryegrass IgG4:IgE ratio at 4 years
ryeg4_ige_5	ryegrass IgG4:IgE ratio at 5 years
grassigg_1	IgG to rPhl p1 at 1 year.
grassigg_2	IgG to rPhl p1 at 2 years.
grassigg_3	IgG to rPhl p1 at 3 years.
grassigg_5	IgG to rPhl p1 at 5 years.
grassigg_10	IgG to rPhl p1 at 10 years.
mouige6m	IgE to mould mix at 6 months. Continuous kU/L
mouige1	IgE to mould mix at 1 year. Continuous kU/L
mouige2	IgE to mould mix at 2 years. Continuous kU/L
mouige3	IgE to mould mix at 3 years. Continuous kU/L
mouige4	IgE to mould mix at 4 years. Continuous kU/L
mouige5	IgE to mould mix at 5 years. Continuous kU/L
mouige10	IgE to mould mix at 10 years. Continuous kU/L
moug4_6m	IgG4 to mould mix at 6 months. Continuous µg/L
moug4_1	IgG4 to mould mix at 1 year. Continuous µg/L
moug4_2	IgG4 to mould mix at 2 years. Continuous µg/L
moug4_3	IgG4 to mould mix at 3 years. Continuous µg/L
moug4_4	IgG4 to mould mix at 4 years. Continuous µg/L
moug4_5	IgG4 to mould mix at 5 years. Continuous µg/L
moug4_ige_6m	mould mix IgG4:IgE ratio at 6 months
moug4_ige_1	mould mix IgG4:IgE ratio at 1 year
moug4_ige_2	mould mix IgG4:IgE ratio at 2 years
moug4_ige_3	mould mix IgG4:IgE ratio at 3 years
moug4_ige_4	mould mix IgG4:IgE ratio at 4 years
moug4_ige_5	mould mix IgG4:IgE ratio at 5 years
fmxige5	IgE to food mix (egg white, milk, fish, wheat, peanut and soybean) at 5 years. Continuous kU/L
fmxg4_5	IgG4 to food mix (egg white, milk, fish, wheat, peanut and soybean) at 5 years. Continuous µg/L
phinfige6m	Infant Phadiatop IgE at 6 months. Continuous PAU/L
phinfige1	Infant Phadiatop IgE at 1 year. Continuous PAU/L
phinfige2	Infant Phadiatop IgE at 2 years. Continuous PAU/L
phinfige3	Infant Phadiatop IgE at 3 years. Continuous PAU/L
phinfige4	Infant Phadiatop IgE at 4 years. Continuous PAU/L
phadige5	Phadiatop IgE at 5 years. Continuous PAU/L
phige10	Phadiatop IgE at 10 years. Continuous PAU/L
phinfg4_6m	Infant Phadiatop IgG4 at 6 months. Continuous PAU/L
phinfg4_1	Infant Phadiatop IgG4 at 1 year. Continuous PAU/L
phinfg4_2	Infant Phadiatop IgG4 at 2 years. Continuous PAU/L
phinfg4_3	Infant Phadiatop IgG4 at 3 years. Continuous PAU/L
phinfg4_4	Infant Phadiatop IgG4 at 4 years. Continuous PAU/L
phadg4_5	Phadiatop IgG4 at 5 years. Continuous PAU/L
phinfg4_ige_6m	Phadiatop IgG4:IgE ratio at 6 months
phinfg4_ige_1	Phadiatop IgG4:IgE ratio at 1 year
phinfg4_ige_2	Phadiatop IgG4:IgE ratio at 2 years
phinfg4_ige_3	Phadiatop IgG4:IgE ratio at 3 years
phinfg4_ige_4	Phadiatop IgG4:IgE ratio at 4 years
phinfg4_ige_5	Phadiatop IgG4:IgE ratio at 5 years
mhdm13_cd	IL-13 to house dust mite in CBMC from cord blood, mRNA expression above unstimulated control, ≤0 have been converted to 0.000001
mhdm13_6m	IL-13 to house dust mite at 6 months: mRNA expression above unstimulated control, ≤0 have been converted to 0.000001
mhdm13_1	IL-13 to house dust mite at 1 year: mRNA expression above unstimulated control, ≤0 have been converted to 0.000001
mhdm13_2	IL-13 to house dust mite at 2 years: mRNA expression above unstimulated control, ≤0 have been converted to 0.000001
mhdm13_3	IL-13 to house dust mite at 3 years: mRNA expression above unstimulated control, ≤0 have been converted to 0.000001
mhdm13_5	IL-13 to house dust mite at 5 years: mRNA expression above unstimulated control, ≤0 have been converted to 0.000001
mhdm4_cd	IL-4 to house dust mite in CBMC from cord blood, mRNA expression above unstimulated control, ≤0 have been converted to 0.000001
mhdm4_6m	IL-4 to house dust mite at 6 months: mRNA expression above unstimulated control, ≤0 have been converted to 0.000001
mhdm4_1	IL-4 to house dust mite at 1 year: mRNA expression above unstimulated control, ≤0 have been converted to 0.000001
mhdm4_2	IL-4 to house dust mite at 2 years: mRNA expression above unstimulated control, ≤0 have been converted to 0.000001
mhdm4_3	IL-4 to house dust mite at 3 years: mRNA expression above unstimulated control, ≤0 have been converted to 0.000001
mhdm4_5	IL-4 to house dust mite at 5 years: mRNA expression above unstimulated control, ≤0 have been converted to 0.000001
mhdm4r_6m	IL-4 receptor to house dust mite at 6 months: mRNA expression above unstimulated control, ≤0 have been converted to 0.000001
mhdm4r_1	IL-4 receptor to house dust mite at 1 year: mRNA expression above unstimulated control, ≤0 have been converted to 0.000001
mhdm4r_2	IL-4 receptor to house dust mite at 2 years: mRNA expression above unstimulated control, ≤0 have been converted to 0.000001
mhdm4r_3	IL-4 receptor to house dust mite at 3 years: mRNA expression above unstimulated control, ≤0 have been converted to 0.000001
mhdm4r_5	IL-4 receptor to house dust mite at 5 years: mRNA expression above unstimulated control, ≤0 have been converted to 0.000001
mhdm5_cd	IL-5 to house dust mite in CBMC from cord blood, mRNA expression above unstimulated control, ≤0 have been converted to 0.000001
mhdm5_6m	IL-5 to house dust mite at 6 months: mRNA expression above unstimulated control, ≤0 have been converted to 0.000001
mhdm5_1	IL-5 to house dust mite at 1 year: mRNA expression above unstimulated control, ≤0 have been converted to 0.000001
mhdm5_2	IL-5 to house dust mite at 2 years: mRNA expression above unstimulated control, ≤0 have been converted to 0.000001
mhdm5_3	IL-5 to house dust mite at 3 years: mRNA expression above unstimulated control, ≤0 have been converted to 0.000001
mhdm5_5	IL-5 to house dust mite at 5 years: mRNA expression above unstimulated control, ≤0 have been converted to 0.000001
mhdm9_cd	IL-9 to house dust mite in CBMC from cord blood, mRNA expression above unstimulated control, ≤0 have been converted to 0.000001
mhdm9_6m	IL-9 to house dust mite at 6 months: mRNA expression above unstimulated control, ≤0 have been converted to 0.000001
mhdm9_1	IL-9 to house dust mite at 1 year: mRNA expression above unstimulated control, ≤0 have been converted to 0.000001
mhdm9_2	IL-9 to house dust mite at 2 years: mRNA expression above unstimulated control, ≤0 have been converted to 0.000001
mhdm9_3	IL-9 to house dust mite at 3 years: mRNA expression above unstimulated control, ≤0 have been converted to 0.000001
mhdm9_5	IL-9 to house dust mite at 5 years: mRNA expression above unstimulated control, ≤0 have been converted to 0.000001
mhdmg_cd	IFNg to house dust mite in CBMC from cord blood, mRNA expression above unstimulated control, ≤0 have been converted to 0.000001
mhdmg_6m	IFNg to house dust mite at 6 months: mRNA expression above unstimulated control, ≤0 have been converted to 0.000001
mhdmg_1	IFNg to house dust mite at 1 year: mRNA expression above unstimulated control, ≤0 have been converted to 0.000001
mhdmg_2	IFNg to house dust mite at 2 years: mRNA expression above unstimulated control, ≤0 have been converted to 0.000001
mhdmg_3	IFNg to house dust mite at 3 years: mRNA expression above unstimulated control, ≤0 have been converted to 0.000001
mhdmg_5	IFNg to house dust mite at 5 years: mRNA expression above unstimulated control, ≤0 have been converted to 0.000001
mhdmcish_2	CISH to house dust mite at 2 years: mRNA expression above unstimulated control, ≤0 have been converted to 0.000001
mhdmdac_2	DACT1 to house dust mite at 2 years: mRNA expression above unstimulated control, ≤0 have been converted to 0.000001
mhdmplx_2	PLXDC1 to house dust mite at 2 years: mRNA expression above unstimulated control, ≤0 have been converted to 0.000001
hdm13_cd	IL-13 to house dust mite (D. pteronyssinus) in CBMC from cord blood. Protein production above unstimulated control, ≤0 converted to 0.01pg/ml. Continuous pg/ml.
hdm13_6m	IL-13 to house dust mite (D. pteronyssinus) at 6 months. Protein production above unstimulated control, ≤0 converted to 0.01pg/ml. Continuous pg/ml.
hdm13_1	IL-13 to house dust mite (D. pteronyssinus) at 1 year. Protein production above unstimulated control, ≤0 converted to 0.01pg/ml. Continuous pg/ml.
hdm13_2	IL-13 to house dust mite (D. pteronyssinus) at 2 years. Protein production above unstimulated control, ≤0 converted to 0.01pg/ml. Continuous pg/ml.
hdm13_3	IL-13 to house dust mite (D. pteronyssinus) at 3 years. Protein production above unstimulated control, ≤0 converted to 0.01pg/ml. Continuous pg/ml.
hdm13_5	IL-13 to house dust mite (D. pteronyssinus) at 5 years. Protein production above unstimulated control, ≤0 converted to 0.01pg/ml. Continuous pg/ml.
hdm5_cd	IL-5 to house dust mite (D. pteronyssinus) in CBMC from cord blood. Protein production above unstimulated control, ≤0 converted to 0.01pg/ml. Continuous pg/ml.
hdm5_6m	IL-5 to house dust mite (D. pteronyssinus) at 6 months. Protein production above unstimulated control, ≤0 converted to 0.01pg/ml. Continuous pg/ml.
hdm5_1	IL-5 to house dust mite (D. pteronyssinus) at 1 year. Protein production above unstimulated control, ≤0 converted to 0.01pg/ml. Continuous pg/ml.
hdm5_2	IL-5 to house dust mite (D. pteronyssinus) at 2 years. Protein production above unstimulated control, ≤0 converted to 0.01pg/ml. Continuous pg/ml.
hdm5_3	IL-5 to house dust mite (D. pteronyssinus) at 3 years. Protein production above unstimulated control, ≤0 converted to 0.01pg/ml. Continuous pg/ml.
hdm5_5	IL-5 to house dust mite (D. pteronyssinus) at 5 years. Protein production above unstimulated control, ≤0 converted to 0.01pg/ml. Continuous pg/ml.
hdm10_cd	IL-10 to house dust mite (D. pteronyssinus) in CBMC from cord blood. Protein production above unstimulated control, ≤0 converted to 0.01pg/ml. Continuous pg/ml.
hdm10_6m	IL-10 to house dust mite (D. pteronyssinus) at 6 months. Protein production above unstimulated control, ≤0 converted to 0.01pg/ml. Continuous pg/ml.
hdm10_1	IL-10 to house dust mite (D. pteronyssinus) at 1 year. Protein production above unstimulated control, ≤0 converted to 0.01pg/ml. Continuous pg/ml.
hdm10_2	IL-10 to house dust mite (D. pteronyssinus) at 2 years. Protein production above unstimulated control, ≤0 converted to 0.01pg/ml. Continuous pg/ml.
hdm10_3	IL-10 to house dust mite (D. pteronyssinus) at 3 years. Protein production above unstimulated control, ≤0 converted to 0.01pg/ml. Continuous pg/ml.
hdm10_5	IL-10 to house dust mite (D. pteronyssinus) at 5 years. Protein production above unstimulated control, ≤0 converted to 0.01pg/ml. Continuous pg/ml.
hdmg_cd	IFNg to house dust mite (D. pteronyssinus) in CBMC from cord blood. Protein production above unstimulated control, ≤0 converted to 0.01pg/ml. Continuous pg/ml.
hdmg_6m	IFNg to house dust mite (D. pteronyssinus) at 6 months. Protein production above unstimulated control, ≤0 converted to 0.01pg/ml. Continuous pg/ml.
hdmg_1	IFNg to house dust mite (D. pteronyssinus) at 1 year. Protein production above unstimulated control, ≤0 converted to 0.01pg/ml. Continuous pg/ml.
hdmg_2	IFNg to house dust mite (D. pteronyssinus) at 2 years. Protein production above unstimulated control, ≤0 converted to 0.01pg/ml. Continuous pg/ml.
hdmg_3	IFNg to house dust mite (D. pteronyssinus) at 3 years. Protein production above unstimulated control, ≤0 converted to 0.01pg/ml. Continuous pg/ml.
hdmg_5	IFNg to house dust mite (D. pteronyssinus) at 5 years. Protein production above unstimulated control, ≤0 converted to 0.01pg/ml. Continuous pg/ml.
hdmt_1	TNFa to house dust mite (D. pteronyssinus) at 1 year. (pg/ml) Protein production above unstimulated control (<=0 have been converted to 0.01)
cat13_cd	IL-13 to cat in CBMC from cord blood. Protein production above unstimulated control, ≤0 converted to 0.01pg/ml. Continuous pg/ml.
fel13_cd	IL-13 to Fel d1 (cat allergen) in CBMC from cord blood. Protein production above unstimulated control, ≤0 converted to 0.01pg/ml. Continuous pg/ml.
fel13_5	IL-13 to Fel d1 (Cat allergen) at 5 years. (pg/ml) Protein production above unstimulated control (<=0 have been converted to 0.01)
cat5_cd	IL-5 to cat in CBMC from cord blood. Protein production above unstimulated control, ≤0 converted to 0.01pg/ml. Continuous pg/ml.
fel5_cd	IL-5 to Fel d1 (cat allergen) in CBMC from cord blood. Protein production above unstimulated control, ≤0 converted to 0.01pg/ml. Continuous pg/ml.
fel5_5	IL-5 to Fel d1 (Cat allergen) at 5 years. (pg/ml) Protein production above unstimulated control (<=0 have been converted to 0.01)
cat10_cd	IL-10 to cat in CBMC from cord blood. Protein production above unstimulated control, ≤0 converted to 0.01pg/ml. Continuous pg/ml.
fel10_cd	IL-10 to Fel d1 (cat allergen) in CBMC from cord blood. Protein production above unstimulated control, ≤0 converted to 0.01pg/ml. Continuous pg/ml.
fel10_5	IL-10 to Fel d1 (Cat allergen) at 5 years. (pg/ml) Protein production above unstimulated control (<=0 have been converted to 0.01)
catg_cd	IFNg to cat in CBMC from cord blood. Protein production above unstimulated control, ≤0 converted to 0.01pg/ml. Continuous pg/ml.
felg_cd	IFNg to Fel d1 (cat allergen) in CBMC from cord blood. Protein production above unstimulated control, ≤0 converted to 0.01pg/ml. Continuous pg/ml.
felg_5	IFNg to Fel d1 (Cat allergen) at 5 years. (pg/ml) Protein production above unstimulated control (<=0 have been converted to 0.01)
ara13_6m	IL-13 to arah2 (peanut allergen) at 6 months. (pg/ml) Protein production above unstimulated control (<=0 have been converted to 0.01)
ara13_1	IL-13 to arah2 (peanut allergen) at 1 year. (pg/ml) Protein production above unstimulated control (<=0 have been converted to 0.01)
pnt13_2	IL-13 to peanut at 2 years. (pg/ml) Protein production above unstimulated control (<=0 have been converted to 0.01)
pnt13_5	IL-13 to peanut at 5 years. (pg/ml) Protein production above unstimulated control (<=0 have been converted to 0.01)
ara5_6m	IL-5 to arah2 (peanut allergen) at 6 months. (pg/ml) Protein production above unstimulated control (<=0 have been converted to 0.01)
ara5_1	IL-5 to arah2 (peanut allergen) at 1 year. (pg/ml) Protein production above unstimulated control (<=0 have been converted to 0.01)
pnt5_2	IL-5 to peanut at 2 years. (pg/ml) Protein production above unstimulated control (<=0 have been converted to 0.01)
pnt5_5	IL-5 to peanut at 5 years. (pg/ml) Protein production above unstimulated control (<=0 have been converted to 0.01)
ara10_6m	IL-10 to arah2 (peanut allergen) at 6 months. (pg/ml) Protein production above unstimulated control (<=0 have been converted to 0.01)
ara10_1	IL-10 to arah2 (peanut allergen) at 1 year. (pg/ml) Protein production above unstimulated control (<=0 have been converted to 0.01)
pnt10_2	IL-10 to peanut at 2 years. (pg/ml) Protein production above unstimulated control (<=0 have been converted to 0.01)
pnt10_5	IL-10 to peanut at 5 years. (pg/ml) Protein production above unstimulated control (<=0 have been converted to 0.01)
arag_6m	IFNg to arah2 (peanut allergen) at 6 months. (pg/ml) Protein production above unstimulated control (<=0 have been converted to 0.01)
arag_1	IFNg to arah2 (peanut allergen) at 1 year. (pg/ml) Protein production above unstimulated control (<=0 have been converted to 0.01)
pntg_2	IFNg to peanut at 2 years. (pg/ml) Protein production above unstimulated control (<=0 have been converted to 0.01)
pntg_5	IFNg to peanut at 5 years. (pg/ml) Protein production above unstimulated control (<=0 have been converted to 0.01)
arat_1	TNFa to arah2 (peanut allergen) at 1 year. (pg/ml) Protein production above unstimulated control (<=0 have been converted to 0.01)
ova13_cd	IL-13 to OVA (ovalbumin) in CBMC from cord blood. Protein production above unstimulated control, ≤0 converted to 0.01pg/ml. Continuous pg/ml.
ova13_6m	IL-13 to ovalbumin at 6 months. (pg/ml) Protein production above unstimulated control (<=0 have been converted to 0.01)
ova13_1	IL-13 to ovalbumin at 1 year. (pg/ml) Protein production above unstimulated control (<=0 have been converted to 0.01)
ova13_2	IL-13 to ovalbumin at 2 years. (pg/ml) Protein production above unstimulated control (<=0 have been converted to 0.01)
ova13_5	IL-13 to ovalbumin at 5 years. (pg/ml) Protein production above unstimulated control (<=0 have been converted to 0.01)
ova5_cd	IL-5 to OVA (ovalbumin) in CBMC from cord blood. Protein production above unstimulated control, ≤0 converted to 0.01pg/ml. Continuous pg/ml.
ova5_6m	IL-5 to ovalbumin at 6 months. (pg/ml) Protein production above unstimulated control (<=0 have been converted to 0.01)
ova5_1	IL-5 to ovalbumin at 1 year. (pg/ml) Protein production above unstimulated control (<=0 have been converted to 0.01)
ova5_2	IL-5 to ovalbumin at 2 years. (pg/ml) Protein production above unstimulated control (<=0 have been converted to 0.01)
ova5_5	IL-5 to ovalbumin at 5 years. (pg/ml) Protein production above unstimulated control (<=0 have been converted to 0.01)
ova10_cd	IL-10 to OVA (ovalbumin) in CBMC from cord blood. Protein production above unstimulated control, ≤0 converted to 0.01pg/ml. Continuous pg/ml.
ova10_6m	IL-10 to ovalbumin at 6 months. (pg/ml) Protein production above unstimulated control (<=0 have been converted to 0.01)
ova10_1	IL-10 to ovalbumin at 1 year. (pg/ml) Protein production above unstimulated control (<=0 have been converted to 0.01)
ova10_2	IL-10 to ovalbumin at 2 years. (pg/ml) Protein production above unstimulated control (<=0 have been converted to 0.01)
ova10_5	IL-10 to ovalbumin at 5 years. (pg/ml) Protein production above unstimulated control (<=0 have been converted to 0.01)
ovag_cd	IFNg to OVA (ovalbumin) in CBMC from cord blood. Protein production above unstimulated control, ≤0 converted to 0.01pg/ml. Continuous pg/ml.
ovag_6m	IFNg to ovalbumin at 6 months. (pg/ml) Protein production above unstimulated control (<=0 have been converted to 0.01)
ovag_1	IFNg to ovalbumin at 1 year. (pg/ml) Protein production above unstimulated control (<=0 have been converted to 0.01)
ovag_2	IFNg to ovalbumin at 2 years. (pg/ml) Protein production above unstimulated control (<=0 have been converted to 0.01)
ovag_5	IFNg to ovalbumin at 5 years. (pg/ml) Protein production above unstimulated control (<=0 have been converted to 0.01)
ovat_1	TNFa to ovalbumin at 1 year. (pg/ml) Protein production above unstimulated control (<=0 have been converted to 0.01)
rye13_2	IL-13 to rye grass pollen (Lolium perenne) at 2 years. (pg/ml) Protein production above unstimulated control (<=0 have been converted to 0.01)
rye13_3	IL-13 to rye grass pollen (Lolium perenne) at 3 years. (pg/ml) Protein production above unstimulated control (<=0 have been converted to 0.01)
rye13_5	IL-13 to rye grass pollen (Lolium perenne) at 5 years. (pg/ml) Protein production above unstimulated control (<=0 have been converted to 0.01)
rye5_2	IL-5 to rye grass pollen (Lolium perenne) at 2 years. (pg/ml) Protein production above unstimulated control (<=0 have been converted to 0.01)
rye5_3	IL-5 to rye grass pollen (Lolium perenne) at 3 years. (pg/ml) Protein production above unstimulated control (<=0 have been converted to 0.01)
rye5_5	IL-5 to rye grass pollen (Lolium perenne) at 5 years. (pg/ml) Protein production above unstimulated control (<=0 have been converted to 0.01)
rye10_2	IL-10 to rye grass pollen (Lolium perenne) at 2 years. (pg/ml) Protein production above unstimulated control (<=0 have been converted to 0.01)
rye10_3	IL-10 to rye grass pollen (Lolium perenne) at 3 years. (pg/ml) Protein production above unstimulated control (<=0 have been converted to 0.01)
rye10_5	IL-10 to rye grass pollen (Lolium perenne) at 5 years. (pg/ml) Protein production above unstimulated control (<=0 have been converted to 0.01)
ryeg_2	IFNg to rye grass pollen (Lolium perenne) at 2 years. (pg/ml) Protein production above unstimulated control (<=0 have been converted to 0.01)
ryeg_3	IFNg to rye grass pollen (Lolium perenne) at 3 years. (pg/ml) Protein production above unstimulated control (<=0 have been converted to 0.01)
ryeg_5	IFNg to rye grass pollen (Lolium perenne) at 5 years. (pg/ml) Protein production above unstimulated control (<=0 have been converted to 0.01)
lpsg10_cd	IL-10 to INFg primed LPS (Lipopolysaccharide, TLR 4 ligand) at birth. (pg/ml) Protein production above unstimulated control (<=0 have been converted to 0.01)
lpsg10_6m	IL-10 to INFg primed LPS (Lipopolysaccharide, TLR 4 ligand) at 6 months. (pg/ml) Protein production above unstimulated control (<=0 have been converted to 0.01)
lpsg10_1	IL-10 to INFg primed LPS (Lipopolysaccharide, TLR 4 ligand) at 1 year. (pg/ml) Protein production above unstimulated control (<=0 have been converted to 0.01)
lpsg10_2	IL-10 to INFg primed LPS (Lipopolysaccharide, TLR 4 ligand) at 2 years. (pg/ml) Protein production above unstimulated control (<=0 have been converted to 0.01)
lpsg10_3	IL-10 to INFg primed LPS (Lipopolysaccharide, TLR 4 ligand) at 3 years. (pg/ml) Protein production above unstimulated control (<=0 have been converted to 0.01)
lpsg10_5	IL-10 to INFg primed LPS (Lipopolysaccharide, TLR 4 ligand) at 5 years. (pg/ml) Protein production above unstimulated control (<=0 have been converted to 0.01)
lpsg12_cd	IL-12 to INFg primed LPS (Lipopolysaccharide, TLR 4 ligand) at birth. (pg/ml) Protein production above unstimulated control (<=0 have been converted to 0.01)
lpsg12_6m	IL-12 to INFg primed LPS (Lipopolysaccharide, TLR 4 ligand) at 6 months. (pg/ml) Protein production above unstimulated control (<=0 have been converted to 0.01)
lpsg12_1	IL-12 to INFg primed LPS (Lipopolysaccharide, TLR 4 ligand) at 1 year. (pg/ml) Protein production above unstimulated control (<=0 have been converted to 0.01)
lpsg_g_2	IFNg to INFg primed LPS (Lipopolysaccharide, TLR 4 ligand) at 2 years. (pg/ml) Protein production above unstimulated control (<=0 have been converted to 0.01)
lpsg_g_3	IFNg to INFg primed LPS (Lipopolysaccharide, TLR 4 ligand) at 3 years. (pg/ml) Protein production above unstimulated control (<=0 have been converted to 0.01)
lpsg_g_5	IFNg to INFg primed LPS (Lipopolysaccharide, TLR 4 ligand) at 5 years. (pg/ml) Protein production above unstimulated control (<=0 have been converted to 0.01)
lpsgt_2	TNFa to INFg primed LPS (Lipopolysaccharide, TLR 4 ligand) at 2 years. (pg/ml) Protein production above unstimulated control (<=0 have been converted to 0.01)
lpsgt_3	TNFa to INFg primed LPS (Lipopolysaccharide, TLR 4 ligand) at 3 years. (pg/ml) Protein production above unstimulated control (<=0 have been converted to 0.01)
lpsgt_5	TNFa to INFg primed LPS (Lipopolysaccharide, TLR 4 ligand) at 5 years. (pg/ml) Protein production above unstimulated control (<=0 have been converted to 0.01)
pha10_cd	IL-10 to PHA (Phytohaemagglutinin) in CBMC from cord blood. Protein production above unstimulated control, ≤0 converted to 0.01pg/ml. Continuous pg/ml.
pha10_6m	IL-10 to PHA (Phytohaemagglutinin) at 6 months. (pg/ml) Protein production above unstimulated control (<=0 have been converted to 0.01)
pha10_1	IL-10 to PHA (Phytohaemagglutinin) at 1 year. (pg/ml) Protein production above unstimulated control (<=0 have been converted to 0.01)
pha10_2	IL-10 to PHA (Phytohaemagglutinin) at 2 years. (pg/ml) Protein production above unstimulated control (<=0 have been converted to 0.01)
pha10_5	IL-10 to PHA (Phytohaemagglutinin) at 5 years. (pg/ml) Protein production above unstimulated control (<=0 have been converted to 0.01)
pha13_cd	IL-13 to PHA (Phytohaemagglutinin) in CBMC from cord blood. Protein production above unstimulated control, ≤0 converted to 0.01pg/ml. Continuous pg/ml.
pha13_6m	IL-13 to PHA (Phytohaemagglutinin) at 6 months. (pg/ml) Protein production above unstimulated control (<=0 have been converted to 0.01)
pha13_1	IL-13 to PHA (Phytohaemagglutinin) at 1 year. (pg/ml) Protein production above unstimulated control (<=0 have been converted to 0.01)
pha13_2	IL-13 to PHA (Phytohaemagglutinin) at 2 years. (pg/ml) Protein production above unstimulated control (<=0 have been converted to 0.01)
pha13_5	IL-13 to PHA (Phytohaemagglutinin) at 5 years. (pg/ml) Protein production above unstimulated control (<=0 have been converted to 0.01)
pha5_cd	IL-5 to PHA (Phytohaemagglutinin) in CBMC from cord blood. Protein production above unstimulated control, ≤0 converted to 0.01pg/ml. Continuous pg/ml.
pha5_6m	IL-5 to PHA (Phytohaemagglutinin) at 6 months. (pg/ml) Protein production above unstimulated control (<=0 have been converted to 0.01)
pha5_1	IL-5 to PHA (Phytohaemagglutinin) at 1 year. (pg/ml) Protein production above unstimulated control (<=0 have been converted to 0.01)
pha5_2	IL-5 to PHA (Phytohaemagglutinin) at 2 years. (pg/ml) Protein production above unstimulated control (<=0 have been converted to 0.01)
pha5_5	IL-5 to PHA (Phytohaemagglutinin) at 5 years. (pg/ml) Protein production above unstimulated control (<=0 have been converted to 0.01)
phag_cd	IFNg to PHA (Phytohaemagglutinin) in CBMC from cord blood. Protein production above unstimulated control, ≤0 converted to 0.01pg/ml. Continuous pg/ml.
phag_6m	IFNg to PHA (Phytohaemagglutinin) at 6 months. (pg/ml) Protein production above unstimulated control (<=0 have been converted to 0.01)
phag_1	IFNg to PHA (Phytohaemagglutinin) at 1 year. (pg/ml) Protein production above unstimulated control (<=0 have been converted to 0.01)
phag_2	IFNg to PHA (Phytohaemagglutinin) at 2 years. (pg/ml) Protein production above unstimulated control (<=0 have been converted to 0.01)
phag_5	IFNg to PHA (Phytohaemagglutinin) at 5 years. (pg/ml) Protein production above unstimulated control (<=0 have been converted to 0.01)
phat_1	TNFa to PHA (Phytohaemagglutinin) at 1 year. (pg/ml) Protein production above unstimulated control (<=0 have been converted to 0.01)
seb10_cd	IL-10 to SEB (Staphylococcal enterotoxin B) in CBMC from cord blood. Protein production above unstimulated control, ≤0 converted to 0.01pg/ml. Continuous pg/ml.
seb10_6m	IL-10 to Staphylococcal enterotoxin B at 6 months. (pg/ml) Protein production above unstimulated control (<=0 have been converted to 0.01)
seb10_1	IL-10 to Staphylococcal enterotoxin B at 1 year. (pg/ml) Protein production above unstimulated control (<=0 have been converted to 0.01)
seb10_2	IL-10 to Staphylococcal enterotoxin B at 2 years. (pg/ml) Protein production above unstimulated control (<=0 have been converted to 0.01)
seb10_5	IL-10 to Staphylococcal enterotoxin B at 5 years. (pg/ml) Protein production above unstimulated control (<=0 have been converted to 0.01)
seb13_cd	IL-13 to SEB (Staphylococcal enterotoxin B) in CBMC from cord blood. Protein production above unstimulated control, ≤0 converted to 0.01pg/ml. Continuous pg/ml.
seb13_6m	IL-13 to Staphylococcal enterotoxin B at 6 months. (pg/ml) Protein production above unstimulated control (<=0 have been converted to 0.01)
seb13_1	IL-13 to Staphylococcal enterotoxin B at 1 year. (pg/ml) Protein production above unstimulated control (<=0 have been converted to 0.01)
seb13_2	IL-13 to Staphylococcal enterotoxin B at 2 years. (pg/ml) Protein production above unstimulated control (<=0 have been converted to 0.01)
seb13_5	IL-13 to Staphylococcal enterotoxin B at 5 years. (pg/ml) Protein production above unstimulated control (<=0 have been converted to 0.01)
seb5_cd	IL-5 to SEB (Staphylococcal enterotoxin B) in CBMC from cord blood. Protein production above unstimulated control, ≤0 converted to 0.01pg/ml. Continuous pg/ml.
seb5_6m	IL-5 to Staphylococcal enterotoxin B at 6 months. (pg/ml) Protein production above unstimulated control (<=0 have been converted to 0.01)
seb5_1	IL-5 to Staphylococcal enterotoxin B at 1 year. (pg/ml) Protein production above unstimulated control (<=0 have been converted to 0.01)
seb5_2	IL-5 to Staphylococcal enterotoxin B at 2 years. (pg/ml) Protein production above unstimulated control (<=0 have been converted to 0.01)
seb5_5	IL-5 to Staphylococcal enterotoxin B at 5 years. (pg/ml) Protein production above unstimulated control (<=0 have been converted to 0.01)
sebg_cd	IFNg to SEB (Staphylococcal enterotoxin B) in CBMC from cord blood. Protein production above unstimulated control, ≤0 converted to 0.01pg/ml. Continuous pg/ml.
sebg_6m	IFNg to Staphylococcal enterotoxin B at 6 months. (pg/ml) Protein production above unstimulated control (<=0 have been converted to 0.01)
sebg_1	IFNg to Staphylococcal enterotoxin B at 1 year. (pg/ml) Protein production above unstimulated control (<=0 have been converted to 0.01)
sebg_2	IFNg to Staphylococcal enterotoxin B at 2 years. (pg/ml) Protein production above unstimulated control (<=0 have been converted to 0.01)
sebg_5	IFNg to Staphylococcal enterotoxin B at 5 years. (pg/ml) Protein production above unstimulated control (<=0 have been converted to 0.01)
sebt_1	TNFa to Staphylococcal enterotoxin B at 1 year. (pg/ml) Protein production above unstimulated control (<=0 have been converted to 0.01)
rsv10_6m	IL-10 to RSV (Respiratory Syncytial Virus) at 6 months. (pg/ml) Protein production above unstimulated control (<=0 have been converted to 0.01)
rsv10_1	IL-10 to RSV (Respiratory Syncytial Virus) at 1 year. (pg/ml) Protein production above unstimulated control (<=0 have been converted to 0.01)
rsv13_6m	IL-13 to RSV (Respiratory Syncytial Virus) at 6 months. (pg/ml) Protein production above unstimulated control (<=0 have been converted to 0.01)
rsv13_1	IL-13 to RSV (Respiratory Syncytial Virus) at 1 year. (pg/ml) Protein production above unstimulated control (<=0 have been converted to 0.01)
rsv5_6m	IL-5 to RSV (Respiratory Syncytial Virus) at 6 months. (pg/ml) Protein production above unstimulated control (<=0 have been converted to 0.01)
rsv5_1	IL-5 to RSV (Respiratory Syncytial Virus) at 1 year. (pg/ml) Protein production above unstimulated control (<=0 have been converted to 0.01)
rsvg_6m	IFNg to RSV (Respiratory Syncytial Virus) at 6 months. (pg/ml) Protein production above unstimulated control (<=0 have been converted to 0.01)
rsvg_1	IFNg to RSV (Respiratory Syncytial Virus) at 1 year. (pg/ml) Protein production above unstimulated control (<=0 have been converted to 0.01)
rsvt_1	TNFa to RSV (Respiratory Syncytial Virus) at 1 year. (pg/ml) Protein production above unstimulated control (<=0 have been converted to 0.01)
tt10_6m	IL-10 to tetanus toxoid at 6 months. (pg/ml) Protein production above unstimulated control (<=0 have been converted to 0.01)
tt10_1	IL-10 to tetanus toxoid at 1 year. (pg/ml) Protein production above unstimulated control (<=0 have been converted to 0.01)
tt10_2	IL-10 to tetanus toxoid at 2 years. (pg/ml) Protein production above unstimulated control (<=0 have been converted to 0.01)
tt10_5	IL-10 to tetanus toxoid at 5 years. (pg/ml) Protein production above unstimulated control (<=0 have been converted to 0.01)
tt13_6m	IL-13 to tetanus toxoid at 6 months. (pg/ml) Protein production above unstimulated control (<=0 have been converted to 0.01)
tt13_1	IL-13 to tetanus toxoid at 1 year. (pg/ml) Protein production above unstimulated control (<=0 have been converted to 0.01)
tt13_2	IL-13 to tetanus toxoid at 2 years. (pg/ml) Protein production above unstimulated control (<=0 have been converted to 0.01)
tt13_5	IL-13 to tetanus toxoid at 5 years. (pg/ml) Protein production above unstimulated control (<=0 have been converted to 0.01)
tt5_6m	IL-5 to tetanus toxoid at 6 months. (pg/ml) Protein production above unstimulated control (<=0 have been converted to 0.01)
tt5_1	IL-5 to tetanus toxoid at 1 year. (pg/ml) Protein production above unstimulated control (<=0 have been converted to 0.01)
tt5_2	IL-5 to tetanus toxoid at 2 years. (pg/ml) Protein production above unstimulated control (<=0 have been converted to 0.01)
tt5_5	IL-5 to tetanus toxoid at 5 years. (pg/ml) Protein production above unstimulated control (<=0 have been converted to 0.01)
ttg_6m	IFNg to tetanus toxoid at 6 months. (pg/ml) Protein production above unstimulated control (<=0 have been converted to 0.01)
ttg_1	IFNg to tetanus toxoid at 1 year. (pg/ml) Protein production above unstimulated control (<=0 have been converted to 0.01)
ttg_2	IFNg to tetanus toxoid at 2 years. (pg/ml) Protein production above unstimulated control (<=0 have been converted to 0.01)
ttg_5	IFNg to tetanus toxoid at 5 years. (pg/ml) Protein production above unstimulated control (<=0 have been converted to 0.01)
tt_t_1	TNFa to tetanus toxoid at 1 year. (pg/ml) Protein production above unstimulated control (<=0 have been converted to 0.01)
ic10_cd	IL-10 to poly I:C (TLR 3 ligand) in CMBC from cord blood. (pg/ml) Protein production above unstimulated control (<=0 have been converted to 0.01)
ic10_2	IL-10 to poly I:C at 2 years. (pg/ml) Protein production above unstimulated control (<=0 have been converted to 0.01)
ic10_4	IL-10 to poly I:C at 4 years. (pg/ml) Protein production above unstimulated control (<=0 have been converted to 0.01)
ic10_5	IL-10 to poly I:C at 5 years. (pg/ml) Protein production above unstimulated control (<=0 have been converted to 0.01)
ic10_10	IL-10 to poly I:C at 10 years. (pg/ml) Protein production above unstimulated control (<=0 have been converted to 0.01)
ic1b_cd	IL-1b to poly I:C (TLR 3 ligand) in CMBC from cord blood. (pg/ml) Protein production above unstimulated control (<=0 have been converted to 0.01)
ic1b_4	IL-1b to poly I:C at 4 years. (pg/ml) Protein production above unstimulated control (<=0 have been converted to 0.01)
ic1b_10	IL-1b to poly I:C at 10 years. (pg/ml) Protein production above unstimulated control (<=0 have been converted to 0.01)
ic6_cd	IL-6 to poly I:C (TLR 3 ligand) in CMBC from cord blood. (pg/ml) Protein production above unstimulated control (<=0 have been converted to 0.01)
ic6_4	IL-6 to poly I:C at 4 years. (pg/ml) Protein production above unstimulated control (<=0 have been converted to 0.01)
ic6_10	IL-6 to poly I:C at 10 years. (pg/ml) Protein production above unstimulated control (<=0 have been converted to 0.01)
ic8_cd	IL-8 to poly I:C (TLR 3 ligand) in CMBC from cord blood. (pg/ml) Protein production above unstimulated control (<=0 have been converted to 0.01)
ic8_4	IL-8 to poly I:C at 4 years. (pg/ml) Protein production above unstimulated control (<=0 have been converted to 0.01)
ic8_10	IL-8 to poly I:C at 10 years. (pg/ml) Protein production above unstimulated control (<=0 have been converted to 0.01)
icg_cd	IL-10 to poly I:C (TLR 3 ligand) in CMBC from cord blood. (pg/ml) Protein production above unstimulated control (<=0 have been converted to 0.01)
icg_2	IL-10 to poly I:C at 2 years. (pg/ml) Protein production above unstimulated control (<=0 have been converted to 0.01)
icg_4	IL-10 to poly I:C at 4 years. (pg/ml) Protein production above unstimulated control (<=0 have been converted to 0.01)
icg_5	IL-10 to poly I:C at 5 years. (pg/ml) Protein production above unstimulated control (<=0 have been converted to 0.01)
icg_10	IL-10 to poly I:C at 10 years. (pg/ml) Protein production above unstimulated control (<=0 have been converted to 0.01)
icip_cd	IP-10 to poly I:C (TLR 3 ligand) in CMBC from cord blood. (pg/ml) Protein production above unstimulated control (<=0 have been converted to 0.01)
icip_4	IP-10 to poly I:C at 4 years. (pg/ml) Protein production above unstimulated control (<=0 have been converted to 0.01)
icip_10	IP-10 to poly I:C at 10 years. (pg/ml) Protein production above unstimulated control (<=0 have been converted to 0.01)
icmp_cd	MIP1a to poly I:C (TLR 3 ligand) in CMBC from cord blood. (pg/ml) Protein production above unstimulated control (<=0 have been converted to 0.01)
icmp_4	MIP1a to poly I:C at 4 years. (pg/ml) Protein production above unstimulated control (<=0 have been converted to 0.01)
icmp_10	MIP1a to poly I:C at 10 years. (pg/ml) Protein production above unstimulated control (<=0 have been converted to 0.01)
ict_cd	TNFa to poly I:C (TLR 3 ligand) in CMBC from cord blood. (pg/ml) Protein production above unstimulated control (<=0 have been converted to 0.01)
ict_2	TNFa to poly I:C at 2 years. (pg/ml) Protein production above unstimulated control (<=0 have been converted to 0.01)
ict_4	TNFa to poly I:C at 4 years. (pg/ml) Protein production above unstimulated control (<=0 have been converted to 0.01)
ict_5	TNFa to poly I:C at 5 years. (pg/ml) Protein production above unstimulated control (<=0 have been converted to 0.01)
ict_10	TNFa to poly I:C at 10 years. (pg/ml) Protein production above unstimulated control (<=0 have been converted to 0.01)
lta10_2	IL-10 to lipoteichoic acid (TLR 2 ligand) at 2 years. (pg/ml) Protein production above unstimulated control (<=0 have been converted to 0.01)
lta10_5	IL-10 to lipoteichoic acid (TLR 2 ligand) at 5 years. (pg/ml) Protein production above unstimulated control (<=0 have been converted to 0.01)
ltag_2	IFNg to lipoteichoic acid (TLR 2 ligand) at 2 years. (pg/ml) Protein production above unstimulated control (<=0 have been converted to 0.01)
ltag_5	IFNg to lipoteichoic acid (TLR 2 ligand) at 5 years. (pg/ml) Protein production above unstimulated control (<=0 have been converted to 0.01)
ltat_2	TNFa to lipoteichoic acid (TLR 2 ligand) at 2 years. (pg/ml) Protein production above unstimulated control (<=0 have been converted to 0.01)
ltat_5	TNFa to lipoteichoic acid (TLR 2 ligand) at 5 years. (pg/ml) Protein production above unstimulated control (<=0 have been converted to 0.01)
pi10_2	IL-10 to PMA/ionomycin at 2 years. (pg/ml) Protein production above unstimulated control (<=0 have been converted to 0.01)
pi10_5	IL-10 to PMA/ionomycin at 5 years. (pg/ml) Protein production above unstimulated control (<=0 have been converted to 0.01)
pi13_2	IL-13 to PMA/ionomycin at 2 years. (pg/ml) Protein production above unstimulated control (<=0 have been converted to 0.01)
pi13_5	IL-13 to PMA/ionomycin at 5 years. (pg/ml) Protein production above unstimulated control (<=0 have been converted to 0.01)
pi5_2	IL-5 to PMA/ionomycin at 2 years. (pg/ml) Protein production above unstimulated control (<=0 have been converted to 0.01)
pi5_5	IL-5 to PMA/ionomycin at 5 years. (pg/ml) Protein production above unstimulated control (<=0 have been converted to 0.01)
pig_2	IFNg to PMA/ionomycin at 2 years. (pg/ml) Protein production above unstimulated control (<=0 have been converted to 0.01)
pig_5	IFNg to PMA/ionomycin at 5 years. (pg/ml) Protein production above unstimulated control (<=0 have been converted to 0.01)
ps10_2	IL-10 to pansorbin (TLR 2 ligand) at 2 years. (pg/ml) Protein production above unstimulated control (<=0 have been converted to 0.01)
ps10_5	IL-10 to pansorbin (TLR 2 ligand) at 5 years. (pg/ml) Protein production above unstimulated control (<=0 have been converted to 0.01)
psg_2	IFNg to pansorbin (TLR 2 ligand) at 2 years. (pg/ml) Protein production above unstimulated control (<=0 have been converted to 0.01)
psg_5	IFNg to pansorbin (TLR 2 ligand) at 5 years. (pg/ml) Protein production above unstimulated control (<=0 have been converted to 0.01)
pst_2	TNFa to pansorbin (TLR 2 ligand) at 2 years. (pg/ml) Protein production above unstimulated control (<=0 have been converted to 0.01)
pst_5	TNFa to pansorbin (TLR 2 ligand) at 5 years. (pg/ml) Protein production above unstimulated control (<=0 have been converted to 0.01)
msl10_5	IL-10 to measles lysate at 5 years. (pg/ml) Protein production above unstimulated control (<=0 have been converted to 0.01)
msl13_5	IL-13 to measles lysate at 5 years. (pg/ml) Protein production above unstimulated control (<=0 have been converted to 0.01)
msl5_5	IL-5 to measles lysate at 5 years. (pg/ml) Protein production above unstimulated control (<=0 have been converted to 0.01)
mslg_5	IFNg to measles lysate at 5 years. (pg/ml) Protein production above unstimulated control (<=0 have been converted to 0.01)
ppd10_cd	IL-10 to PPD (Purified Protein Derivative of Mycobacterium tuberculosis) in CBMC from cord blood. Protein production above unstimulated control. ≤0 converted to 0.01pg/ml. Continuous pg/ml.
ppd13_cd	IL-13 to PPD (Purified Protein Derivative of Mycobacterium tuberculosis) in CBMC from cord blood. Protein production above unstimulated control. ≤0 converted to 0.01pg/ml. Continuous pg/ml.
ppd5_cd	IL-5 to PPD (Purified Protein Derivative of Mycobacterium tuberculosis) in CBMC from cord blood. Protein production above unstimulated control. ≤0 converted to 0.01pg/ml. Continuous pg/ml.
ppdg_cd	IFNg to PPD (Purified Protein Derivative of Mycobacterium tuberculosis) in CBMC from cord blood. Protein production above unstimulated control. ≤0 converted to 0.01pg/ml. Continuous pg/ml.
hiswl6m	Diameter of wheal size to Histamine in mm at 6 months
hiswl2	Diameter of wheal size to Histamine in mm at 2 years
hiswl5	Diameter of wheal size to Histamine in mm at 5 years
hiswl10	Diameter of wheal size to Histamine in mm at 10 years
hdmwl6m	Diameter of wheal size to HDM in mm at 6 months
hdmwl2	Diameter of wheal size to HDM in mm at 2 years
hdmwl5	Diameter of wheal size to HDM in mm at 5 years
hdmwl10	Diameter of wheal size to HDM in mm at 10 years
catwl6m	Diameter of wheal size to cat allergen in mm at 6 months
catwl2	Diameter of wheal size to cat allergen in mm at 2 years
catwl5	Diameter of wheal size to cat allergen in mm at 5 years
catwl10	Diameter of wheal size to cat allergen in mm at 10 years
ryewl6m	Diameter of wheal size to ryegrass allergen in mm at 6 months
ryewl2	Diameter of wheal size to ryegrass allergen in mm at 2 years
ryewl5	Diameter of wheal size to ryegrass allergen in mm at 5 years
ryewl10	Diameter of wheal size to ryegrass allergen in mm at 10 years
altwl6m	Diameter of wheal size to alternaria in mm at 6 months
altwl2	Diameter of wheal size to alternaria in mm at 2 years
altwl5	Diameter of wheal size to alternaria in mm at 5 years
aspwl6m	Diameter of wheal size to aspergillus in mm at 6 months
aspwl2	Diameter of wheal size to aspergillus in mm at 2 years
aspwl5	Diameter of wheal size to aspergillus in mm at 5 years
mouwl10	Diameter of wheal size to mould in mm at 10 years
cmwl6m	Diameter of wheal size to cow's milk in mm at 6 months
cmwl2	Diameter of wheal size to cow's milk in mm at 2 years
cmwl5	Diameter of wheal size to cow's milk in mm at 5 years
ewwl6m	Diameter of wheal size to egg white in mm at 6 months
ewwl2	Diameter of wheal size to egg white in mm at 2 years
ewwl5	Diameter of wheal size to egg white in mm at 5 years
pntwl5	Diameter of wheal size to peanujt in mm at 5 years
pntwl10	Diameter of wheal size to peanujt in mm at 10 years
couwl10	Diameter of wheal size to couch grass in mm at 10 years
grwl10	Diameter of wheal size to grass in mm at 10 years
totige_100_6m	Total IgE at 6 months greater than 100 kU/L
totige_100_1	Total IgE at 1 year greater than 100 kU/L
totige_100_2	Total IgE at 2 years greater than 100 kU/L
totige_100_3	Total IgE at 3 years greater than 100 kU/L
totige_100_4	Total IgE at 4 years greater than 100 kU/L
totige_100_5	Total IgE at 5 years greater than 100 kU/L
totige_100_10	Total IgE at 10 years greater than 100 kU/L
hdmige_035_6m	HDM IgE at 6 months greater than 0.35 kU/L
hdmige_035_1	HDM IgE at 1 year greater than 0.35 kU/L
hdmige_035_2	HDM IgE at 2 years greater than 0.35 kU/L
hdmige_035_3	HDM IgE at 3 years greater than 0.35 kU/L
hdmige_035_4	HDM IgE at 4 years greater than 0.35 kU/L
hdmige_035_5	HDM IgE at 5 years greater than 0.35 kU/L
hdmige_035_10	HDM IgE at 10 years greater than 0.35 kU/L
catige_035_6m	Cat IgE at 6 months greater than 0.35 kU/L
catige_035_1	Cat IgE at 1 year greater than 0.35 kU/L
catige_035_2	Cat IgE at 2 years greater than 0.35 kU/L
catige_035_3	Cat IgE at 3 years greater than 0.35 kU/L
catige_035_4	Cat IgE at 4 years greater than 0.35 kU/L
catige_035_5	Cat IgE at 5 years greater than 0.35 kU/L
catige_035_10	Cat IgE at 10 years greater than 0.35 kU/L
pntige_035_6m	Peanut IgE at 6 months greater than 0.35 kU/L
pntige_035_1	Peanut IgE at 1 year greater than 0.35 kU/L
pntige_035_2	Peanut IgE at 2 years greater than 0.35 kU/L
pntige_035_3	Peanut IgE at 3 years greater than 0.35 kU/L
pntige_035_4	Peanut IgE at 4 years greater than 0.35 kU/L
pntige_035_5	Peanut IgE at 5 years greater than 0.35 kU/L
pntige_035_10	Peanut IgE at 10 years greater than 0.35 kU/L
couige_035_6m	Couch grass IgE at 6 months greater than 0.35 kU/L
couige_035_1	Couch grass IgE at 1 year greater than 0.35 kU/L
couige_035_2	Couch grass IgE at 2 years greater than 0.35 kU/L
couige_035_3	Couch grass IgE at 3 years greater than 0.35 kU/L
couige_035_4	Couch grass IgE at 4 years greater than 0.35 kU/L
couige_035_5	Couch grass IgE at 5 years greater than 0.35 kU/L
couige_035_10	Couch grass IgE at 10 years greater than 0.35 kU/L
ryeige_035_6m	Ryegrass IgE at 6 months greater than 0.35 kU/L
ryeige_035_1	Ryegrass IgE at 1 year greater than 0.35 kU/L
ryeige_035_3	Ryegrass IgE at 3 years greater than 0.35 kU/L
ryeige_035_4	Ryegrass IgE at 4 years greater than 0.35 kU/L
ryeige_035_5	Ryegrass IgE at 5 years greater than 0.35 kU/L
ryeige_035_10	Ryegrass IgE at 10 years greater than 0.35 kU/L
mouige_035_6m	Mould IgE at 6 months greater than 0.35 kU/L
mouige_035_1	Mould IgE at 1 year greater than 0.35 kU/L
mouige_035_2	Mould IgE at 2 years greater than 0.35 kU/L
mouige_035_3	Mould IgE at 3 years greater than 0.35 kU/L
mouige_035_4	Mould IgE at 4 years greater than 0.35 kU/L
mouige_035_5	Mould IgE at 5 years greater than 0.35 kU/L
mouige_035_10	Mould IgE at 10 years greater than 0.35 kU/L
phinfige_035_6m	Phadiatop IgE at 6 months greater than 0.35 PAU/L
phinfige_035_1	Phadiatop IgE at 1 year greater than 0.35 PAU/L
phinfige_035_2	Phadiatop IgE at 2 years greater than 0.35 PAU/L
phinfige_035_3	Phadiatop IgE at 3 years greater than 0.35 PAU/L
phinfige_035_4	Phadiatop IgE at 4 years greater than 0.35 PAU/L
phadige_035_5	Phadiatop IgE at 5 years greater than 0.35 PAU/L
hisspt6m	Positive skin prick test to Histamine at 6 months (diameter >= 2mm)
hisspt2	Positive skin prick test to Histamine at 2 years (diameter >= 2mm)
hisspt5	Positive skin prick test to Histamine at 5 years (diameter >= 3mm)
hisspt10	Positive skin prick test to Histamine at 10 years (diameter >= 3mm)
hdmspt6m	Positive skin prick test to HDM at 6 months (diameter >= 2mm)
hdmspt2	Positive skin prick test to HDM at 2 years (diameter >= 2mm)
hdmspt5	Positive skin prick test to HDM at 5 years (diameter >= 3mm)
hdmspt10	Positive skin prick test to HDM at 10 years (diameter >= 3mm)
catspt6m	Positive skin prick test to cat allergen at 6 months (diameter >= 2mm)
catspt2	Positive skin prick test to cat allergen at 2 years (diameter >= 2mm)
catspt5	Positive skin prick test to cat allergen at 5 years (diameter >= 3mm)
catspt10	Positive skin prick test to cat allergen at 10 years (diameter >= 3mm)
ryespt6m	Positive skin prick test to ryegrass allergen at 6 months (diameter >= 2mm)
ryespt2	Positive skin prick test to ryegrass allergen at 2 years (diameter >= 2mm)
ryespt5	Positive skin prick test to ryegrass allergen at 5 years (diameter >= 3mm)
ryespt10	Positive skin prick test to ryegrass allergen at 10 years (diameter >= 3mm)
altspt6m	Positive skin prick test to alternaria at 6 months (diameter >= 2mm)
altspt2	Positive skin prick test to alternaria at 2 years (diameter >= 2mm)
altspt5	Positive skin prick test to alternaria at 5 years (diameter >= 3mm)
aspspt6m	Positive skin prick test to aspergillus at 6 months (diameter >= 2mm)
aspspt2	Positive skin prick test to aspergillus at 2 years (diameter >= 2mm)
aspspt5	Positive skin prick test to aspergillus at 5 years (diameter >= 3mm)
cmspt6m	Positive skin prick test to cow's milk at 6 months (diameter >= 2mm)
cmspt2	Positive skin prick test to cow's milk at 2 years (diameter >= 2mm)
cmspt5	Positive skin prick test to cow's milk at 5 years (diameter >= 3mm)
ewspt6m	Positive skin prick test to egg white at 6 months (diameter >= 2mm)
ewspt2	Positive skin prick test to egg white at 2 years (diameter >= 2mm)
ewspt5	Positive skin prick test to egg white at 5 years (diameter >= 3mm)
sptany6m	Positive skin prick test to any of cat, ryegrass, HDM, alternaria, aspergillus, cow's milk or egg white at 6 months (diameter >= 2mm)
sptany2	Positive skin prick test to any of cat, ryegrass, HDM, alternaria, aspergillus, cow's milk or egg white at 2 years (diameter >= 2mm)
sptany5	Positive skin prick test to any of cat, ryegrass, HDM, alternaria, aspergillus, cow's milk or egg white at 5 years (diameter >= 3mm)
sptany10	Positive skin prick test to any of cat, ryegrass, HDM at 10 years (diameter >= 3mm)
ari_1	Total number of acute respiratory tract infections in the last 12 months at 1 year of age (either upper or lower)
ari_2	Total number of acute respiratory tract infections in the last 12 months at 2 years of age (either upper or lower)
ari_3	Total number of acute respiratory tract infections in the last 12 months at 3 years of age (either upper or lower)
ari_4	Total number of acute respiratory tract infections in the last 12 months at 4 years of age (either upper or lower)
ari_5	Total number of acute respiratory tract infections in the last 12 months at 5 years of age (either upper or lower)
uri_1	Number of upper respiratory tract infections in the last 12 months at 1 year of age
uri_2	Number of upper respiratory tract infections in the last 12 months at 2 years of age
uri_3	Number of upper respiratory tract infections in the last 12 months at 3 years of age
uri_4	Number of upper respiratory tract infections in the last 12 months at 4 years of age
uri_5	Number of upper respiratory tract infections in the last 12 months at 5 years of age
lri_1	Number of lower respiratory tract infections in the last 12 months at 1 year of age
lri_2	Number of lower respiratory tract infections in the last 12 months at 2 years of age
lri_3	Number of lower respiratory tract infections in the last 12 months at 3 years of age
lri_4	Number of lower respiratory tract infections in the last 12 months at 4 years of age
lri_5	Number of lower respiratory tract infections in the last 12 months at 5 years of age
wlri_1	Number of wheezy lower respiratory tract infections in the last 12 months at 1 year of age
wlri_2	Number of wheezy lower respiratory tract infections in the last 12 months at 2 years of age
wlri_3	Number of wheezy lower respiratory tract infections in the last 12 months at 3 years of age
wlri_4	Number of wheezy lower respiratory tract infections in the last 12 months at 4 years of age
wlri_5	Number of wheezy lower respiratory tract infections in the last 12 months at 5 years of age
flri_1	Number of febrile lower respiratory tract infections in the last 12 months at 1 year of age
flri_2	Number of febrile lower respiratory tract infections in the last 12 months at 2 years of age
flri_3	Number of febrile lower respiratory tract infections in the last 12 months at 3 years of age
flri_4	Number of febrile lower respiratory tract infections in the last 12 months at 4 years of age
flri_5	Number of febrile lower respiratory tract infections in the last 12 months at 5 years of age
slri_1	Number of severe (wheezy or febrile) lower respiratory tract infections in the last 12 months at 1 year of age
slri_2	Number of severe (wheezy or febrile) lower respiratory tract infections in the last 12 months at 2 years of age
slri_3	Number of severe (wheezy or febrile) lower respiratory tract infections in the last 12 months at 3 years of age
slri_4	Number of severe (wheezy or febrile) lower respiratory tract infections in the last 12 months at 4 years of age
slri_5	Number of severe (wheezy or febrile) lower respiratory tract infections in the last 12 months at 5 years of age
rsv_uri_1	Number of upper respiratory tract infections with RSV positive PCR in the last 12 months at 1 year of age
rsv_uri_2	Number of upper respiratory tract infections with RSV positive PCR in the last 12 months at 2 years of age
rsv_uri_3	Number of upper respiratory tract infections with RSV positive PCR in the last 12 months at 3 years of age
rsv_lri_1	Number of lower respiratory tract infections with RSV positive PCR in the last 12 months at 1 year of age
rsv_lri_2	Number of lower respiratory tract infections with RSV positive PCR in the last 12 months at 2 years of age
rsv_lri_3	Number of lower respiratory tract infections with RSV positive PCR in the last 12 months at 3 years of age
rsv_wlri_1	Number of wheezy lower respiratory tract infections with RSV positive PCR in the last 12 months at 1 year of age
rsv_wlri_2	Number of wheezy lower respiratory tract infections with RSV positive PCR in the last 12 months at 2 years of age
rsv_wlri_3	Number of wheezy lower respiratory tract infections with RSV positive PCR in the last 12 months at 3 years of age
rsv_flri_1	Number of febrile lower respiratory tract infections with RSV positive PCR in the last 12 months at 1 year of age
rsv_flri_2	Number of febrile lower respiratory tract infections with RSV positive PCR in the last 12 months at 2 years of age
rsv_flri_3	Number of febrile lower respiratory tract infections with RSV positive PCR in the last 12 months at 3 years of age
influ_uri_1	Number of upper respiratory tract infections with influenza positive PCR in the last 12 months at 1 year of age
influ_uri_2	Number of upper respiratory tract infections with influenza positive PCR in the last 12 months at 2 years of age
influ_uri_3	Number of upper respiratory tract infections with influenza positive PCR in the last 12 months at 3 years of age
influ_lri_1	Number of lower respiratory tract infections with influenza positive PCR in the last 12 months at 1 year of age
influ_lri_2	Number of lower respiratory tract infections with influenza positive PCR in the last 12 months at 2 years of age
influ_lri_3	Number of lower respiratory tract infections with influenza positive PCR in the last 12 months at 3 years of age
influ_wlri_1	Number of wheezy lower respiratory tract infections with influenza positive PCR in the last 12 months at 1 year of age
influ_wlri_2	Number of wheezy lower respiratory tract infections with influenza positive PCR in the last 12 months at 2 years of age
influ_wlri_3	Number of wheezy lower respiratory tract infections with influenza positive PCR in the last 12 months at 3 years of age
influ_flri_1	Number of febrile lower respiratory tract infections with influenza positive PCR in the last 12 months at 1 year of age
influ_flri_2	Number of febrile lower respiratory tract infections with influenza positive PCR in the last 12 months at 2 years of age
influ_flri_3	Number of febrile lower respiratory tract infections with influenza positive PCR in the last 12 months at 3 years of age
hrva_uri_1	Number of upper respiratory tract infections with HRV-A positive PCR in the last 12 months at 1 year of age
hrva_uri_2	Number of upper respiratory tract infections with HRV-A positive PCR in the last 12 months at 2 years of age
hrva_uri_3	Number of upper respiratory tract infections with HRV-A positive PCR in the last 12 months at 3 years of age
hrva_lri_1	Number of lower respiratory tract infections with HRV-A positive PCR in the last 12 months at 1 year of age
hrva_lri_2	Number of lower respiratory tract infections with HRV-A positive PCR in the last 12 months at 2 years of age
hrva_lri_3	Number of lower respiratory tract infections with HRV-A positive PCR in the last 12 months at 3 years of age
hrva_wlri_1	Number of wheezy lower respiratory tract infections with HRV-A positive PCR in the last 12 months at 1 year of age
hrva_wlri_2	Number of wheezy lower respiratory tract infections with HRV-A positive PCR in the last 12 months at 2 years of age
hrva_wlri_3	Number of wheezy lower respiratory tract infections with HRV-A positive PCR in the last 12 months at 3 years of age
hrva_flri_1	Number of febrile lower respiratory tract infections with HRV-A positive PCR in the last 12 months at 1 year of age
hrva_flri_2	Number of febrile lower respiratory tract infections with HRV-A positive PCR in the last 12 months at 2 years of age
hrva_flri_3	Number of febrile lower respiratory tract infections with HRV-A positive PCR in the last 12 months at 3 years of age
hrvb_uri_1	Number of upper respiratory tract infections with HRV-B positive PCR in the last 12 months at 1 year of age
hrvb_uri_2	Number of upper respiratory tract infections with HRV-B positive PCR in the last 12 months at 2 years of age
hrvb_uri_3	Number of upper respiratory tract infections with HRV-B positive PCR in the last 12 months at 3 years of age
hrvb_lri_1	Number of lower respiratory tract infections with HRV-B positive PCR in the last 12 months at 1 year of age
hrvb_lri_2	Number of lower respiratory tract infections with HRV-B positive PCR in the last 12 months at 2 years of age
hrvb_lri_3	Number of lower respiratory tract infections with HRV-B positive PCR in the last 12 months at 3 years of age
hrvb_wlri_1	Number of wheezy lower respiratory tract infections with HRV-B positive PCR in the last 12 months at 1 year of age
hrvb_wlri_2	Number of wheezy lower respiratory tract infections with HRV-B positive PCR in the last 12 months at 2 years of age
hrvb_wlri_3	Number of wheezy lower respiratory tract infections with HRV-B positive PCR in the last 12 months at 3 years of age
hrvb_flri_1	Number of febrile lower respiratory tract infections with HRV-B positive PCR in the last 12 months at 1 year of age
hrvb_flri_2	Number of febrile lower respiratory tract infections with HRV-B positive PCR in the last 12 months at 2 years of age
hrvb_flri_3	Number of febrile lower respiratory tract infections with HRV-B positive PCR in the last 12 months at 3 years of age
hrvc_uri_1	Number of upper respiratory tract infections with HRV-C positive PCR in the last 12 months at 1 year of age
hrvc_uri_2	Number of upper respiratory tract infections with HRV-C positive PCR in the last 12 months at 2 years of age
hrvc_uri_3	Number of upper respiratory tract infections with HRV-C positive PCR in the last 12 months at 3 years of age
hrvc_lri_1	Number of lower respiratory tract infections with HRV-C positive PCR in the last 12 months at 1 year of age
hrvc_lri_2	Number of lower respiratory tract infections with HRV-C positive PCR in the last 12 months at 2 years of age
hrvc_lri_3	Number of lower respiratory tract infections with HRV-C positive PCR in the last 12 months at 3 years of age
hrvc_wlri_1	Number of wheezy lower respiratory tract infections with HRV-C positive PCR in the last 12 months at 1 year of age
hrvc_wlri_2	Number of wheezy lower respiratory tract infections with HRV-C positive PCR in the last 12 months at 2 years of age
hrvc_wlri_3	Number of wheezy lower respiratory tract infections with HRV-C positive PCR in the last 12 months at 3 years of age
hrvc_flri_1	Number of febrile lower respiratory tract infections with HRV-C positive PCR in the last 12 months at 1 year of age
hrvc_flri_2	Number of febrile lower respiratory tract infections with HRV-C positive PCR in the last 12 months at 2 years of age
hrvc_flri_3	Number of febrile lower respiratory tract infections with HRV-C positive PCR in the last 12 months at 3 years of age
riskMPGs_0_2_quart	Quartile of % healthy NPAs with risk-associated MPGs, up to 2 years of age
riskMPGs_2_4_quart	Quartile of % healthy NPAs with risk-associated MPGs, from 2 to 4 years of age
healthMPGs_0_2_quart	Quartile of % healthy NPAs with health-associated MPGs, up to 2 years of age
healthMPGs_2_4_quart	Quartile of % healthy NPAs with health-associated MPGs, from 2 to 4 years of age
wlri_1.ari_1	Proporiton of ARIs that are wLRIs at 1 year of age
wlri_2.ari_2	Proporiton of ARIs that are wLRIs at 2 years of age
wlri_3.ari_3	Proporiton of ARIs that are wLRIs at 3 years of age
wlri_4.ari_4	Proporiton of ARIs that are wLRIs at 4 years of age
wlri_5.ari_5	Proporiton of ARIs that are wLRIs at 5 years of age
flri_1.ari_1	Proporiton of ARIs that are fLRIs at 1 year of age
flri_2.ari_2	Proporiton of ARIs that are fLRIs at 2 years of age
flri_3.ari_3	Proporiton of ARIs that are fLRIs at 3 years of age
flri_4.ari_4	Proporiton of ARIs that are fLRIs at 4 years of age
flri_5.ari_5	Proporiton of ARIs that are fLRIs at 5 years of age
slri_1.ari_1	Proporiton of ARIs that are sLRIs at 1 year of age
slri_2.ari_2	Proporiton of ARIs that are sLRIs at 2 years of age
slri_3.ari_3	Proporiton of ARIs that are sLRIs at 3 years of age
slri_4.ari_4	Proporiton of ARIs that are sLRIs at 4 years of age
slri_5.ari_5	Proporiton of ARIs that are sLRIs at 5 years of age
wlri_1.lri_1	Proporiton of LRIs that are wLRIs at 1 year of age
wlri_2.lri_2	Proporiton of LRIs that are wLRIs at 2 years of age
wlri_3.lri_3	Proporiton of LRIs that are wLRIs at 3 years of age
wlri_4.lri_4	Proporiton of LRIs that are wLRIs at 4 years of age
wlri_5.lri_5	Proporiton of LRIs that are wLRIs at 5 years of age
flri_1.lri_1	Proporiton of LRIs that are fLRIs at 1 year of age
flri_2.lri_2	Proporiton of LRIs that are fLRIs at 2 years of age
flri_3.lri_3	Proporiton of LRIs that are fLRIs at 3 years of age
flri_4.lri_4	Proporiton of LRIs that are fLRIs at 4 years of age
flri_5.lri_5	Proporiton of LRIs that are fLRIs at 5 years of age
slri_1.lri_1	Proporiton of LRIs that are sLRIs at 1 year of age
slri_2.lri_2	Proporiton of LRIs that are sLRIs at 2 years of age
slri_3.lri_3	Proporiton of LRIs that are sLRIs at 3 years of age
slri_4.lri_4	Proporiton of LRIs that are sLRIs at 4 years of age
slri_5.lri_5	Proporiton of LRIs that are sLRIs at 5 years of age
riskMPGs_0_2	% healthy NPAs with risk-associated MPGs, up to 2 years of age
riskMPGs_2_4	% healthy NPAs with risk-associated MPGs, from 2 to 4 years of age
healthMPGs_0_2	% healthy NPAs with health-associated MPGs, up to 2 years of age
healthMPGs_2_4	% healthy NPAs with health-associated MPGs, from 2 to 4 years of age
strep_raw_6m	Average relative abundance of Streptococcus (raw count) in first infection-naïve NPA at 6 months of age
strep_raw_7w	Average relative abundance of Streptococcus (raw count) in first infection-naïve NPA at 7 weeks of age
strep_cn_6m	Average relative abundance of Streptococcus (copy-number corrected) in first infection-naïve NPA at 6 months of age
strep_cn_7w	Average relative abundance of Streptococcus (copy-number corrected) in first infection-naïve NPA at 7 weeks of age
strep_raw_6m_20	Proportion of samples with > 20% Streptococcus (raw count) in first infection-naïve NPA at 6 months of age
strep_raw_7w_20	Proportion of samples with > 20% Streptococcus (raw count) in first infection-naïve NPA at 7 weeks of age
strep_cn_6m_20	Proportion of samples with > 20% Streptococcus (copy-number corrected) in first infection-naïve NPA at 6 months of age
strep_cn_7w_20	Proportion of samples with > 20% Streptococcus (copy-number corrected) in first infection-naïve NPA at 7 weeks of age
