# Supplementary figures and images for: Trajectories of childhood immune development and respiratory health relevant to asthma and allergy
Source: eLife journal article supplement (doi:10.7554/elife.35856), 2018-10-15

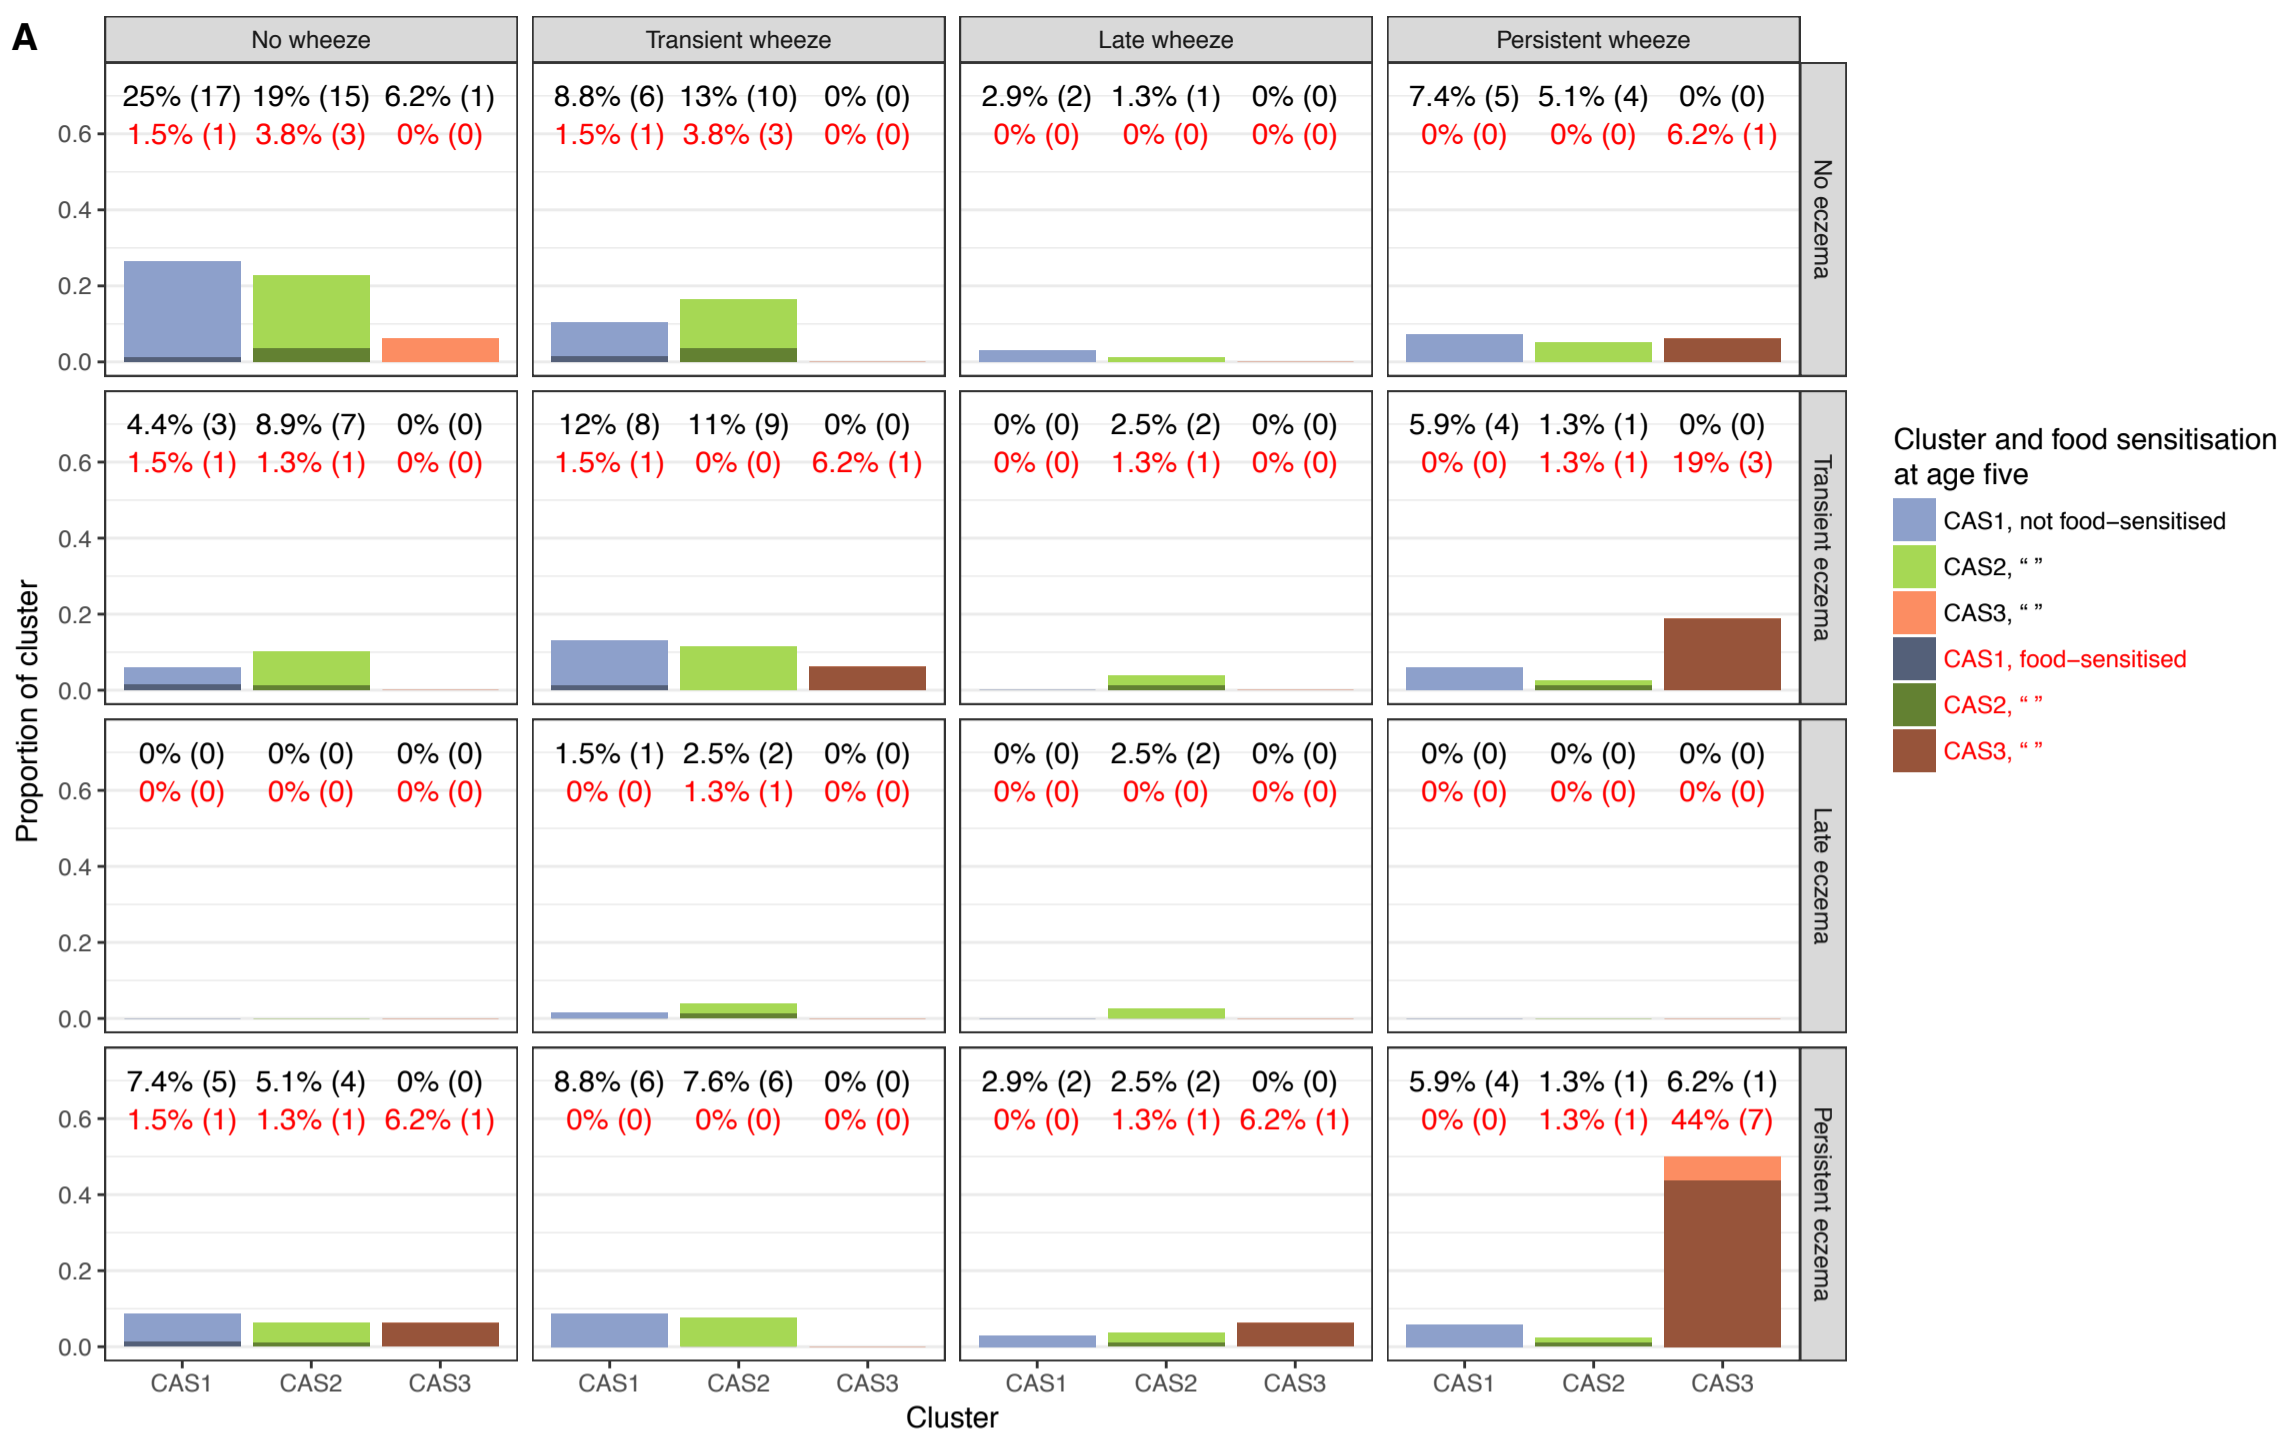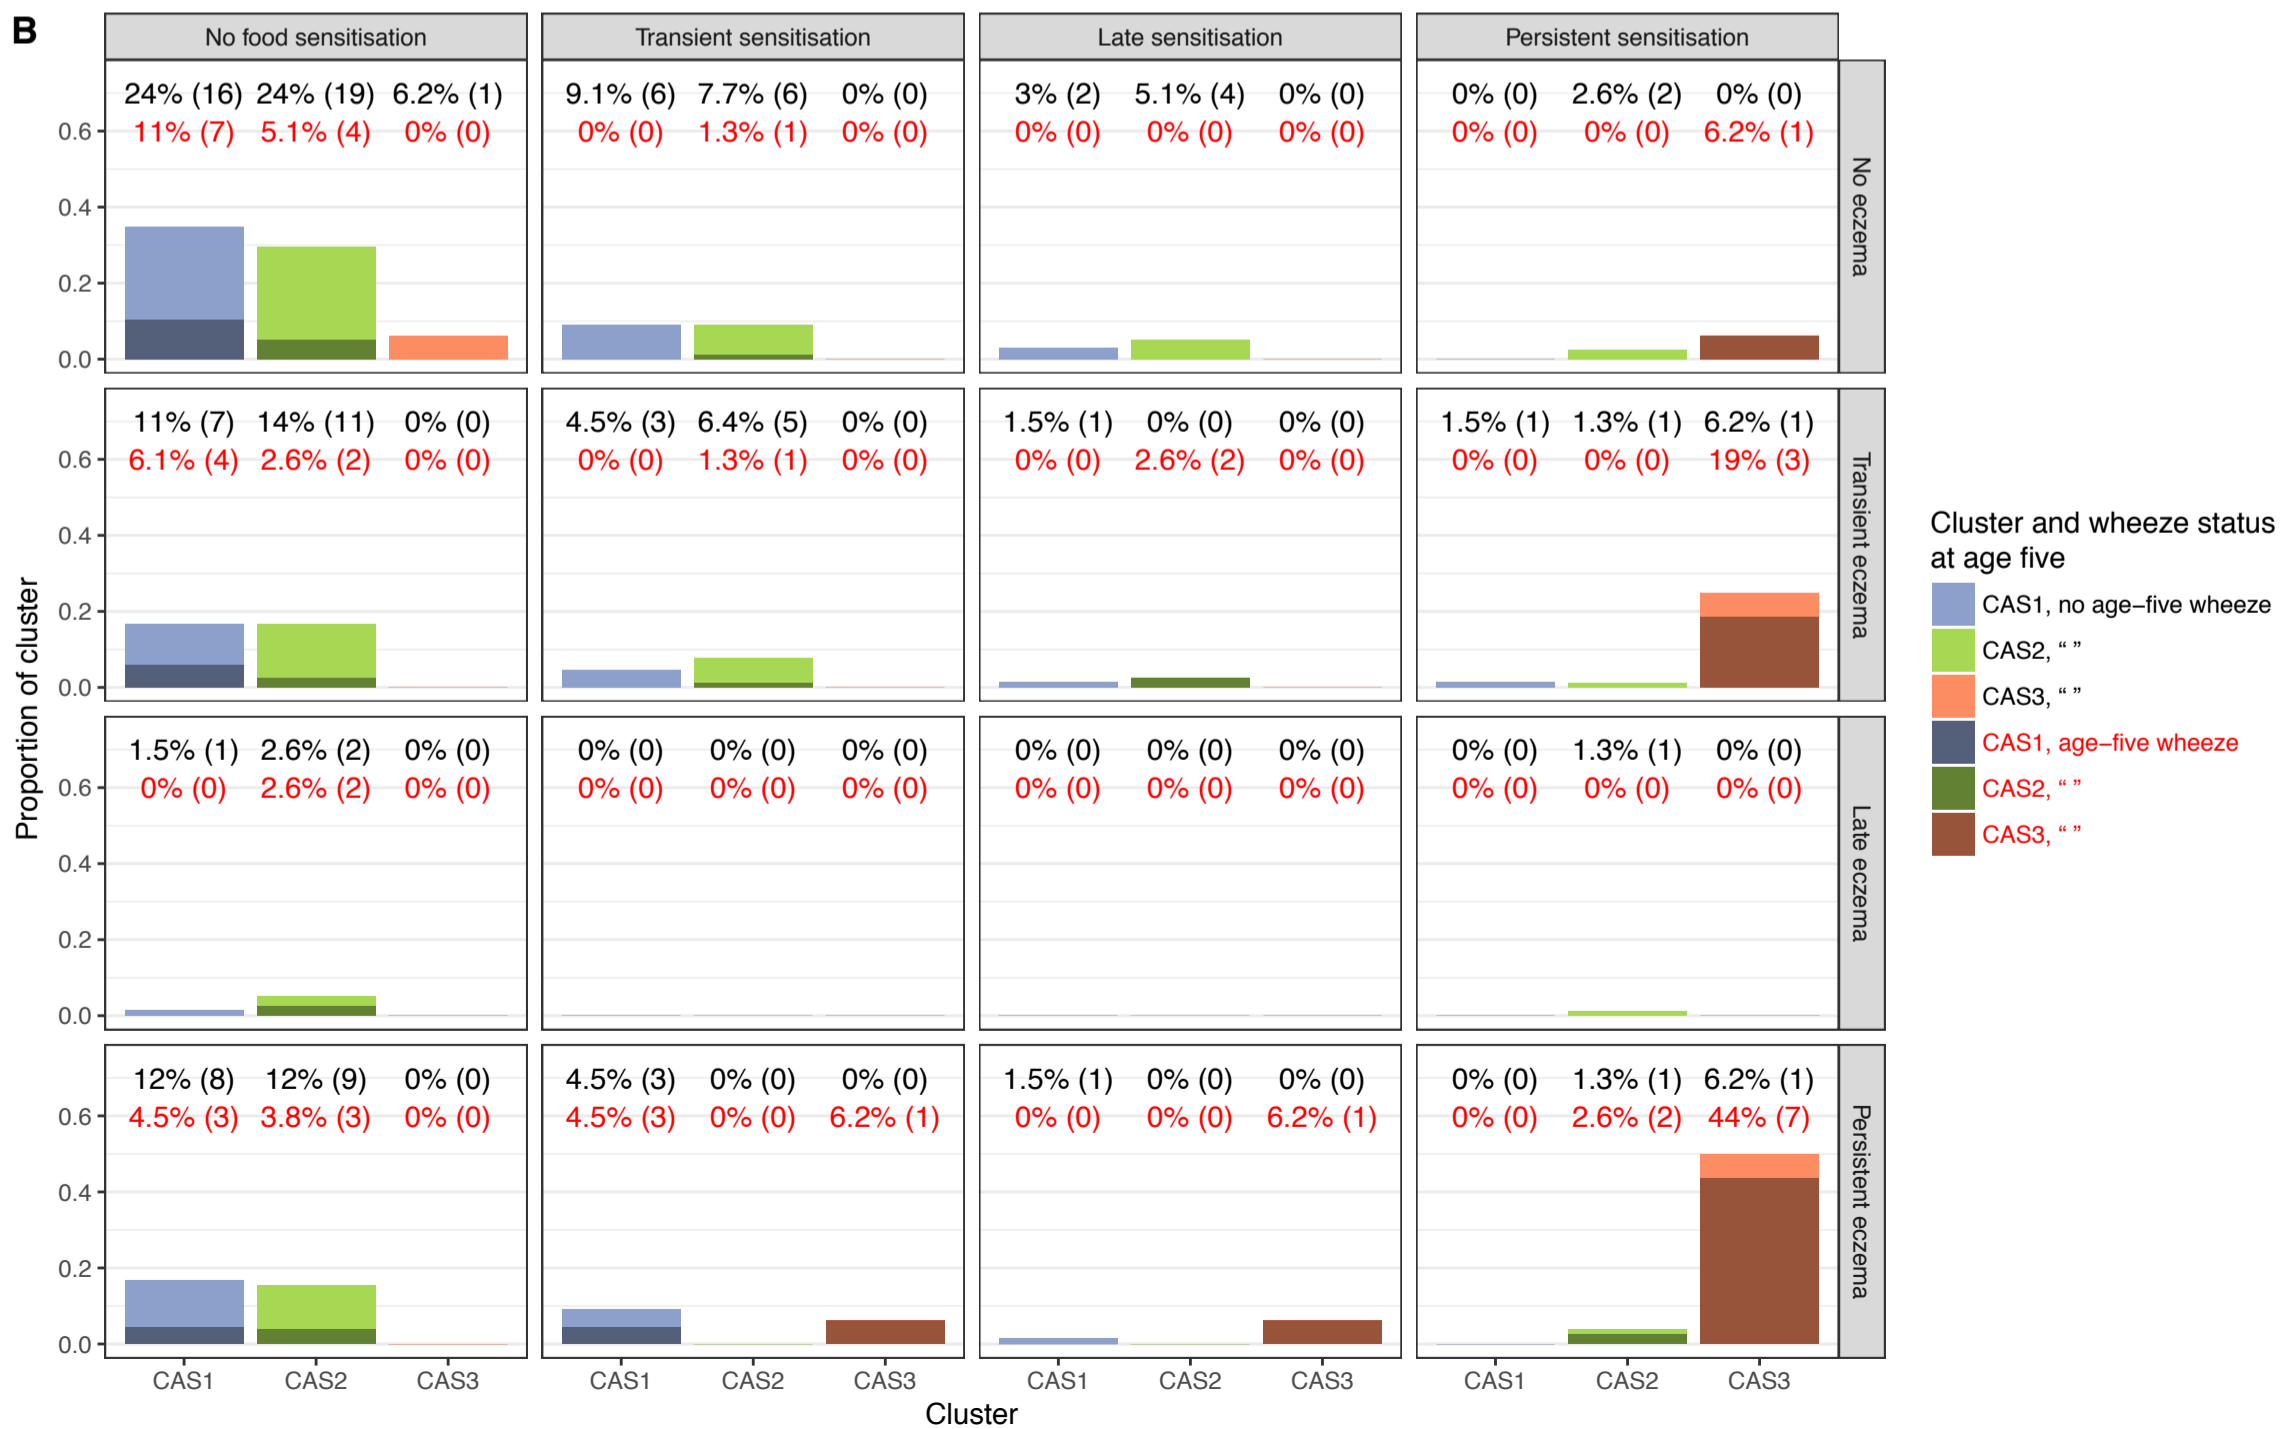

Supplement: supp [file elife-35856-supp-v1.zip › elife_poa_e35856_Figure_3_figure_supplement_1.pdf]

**A**  
Accuracy: 89%

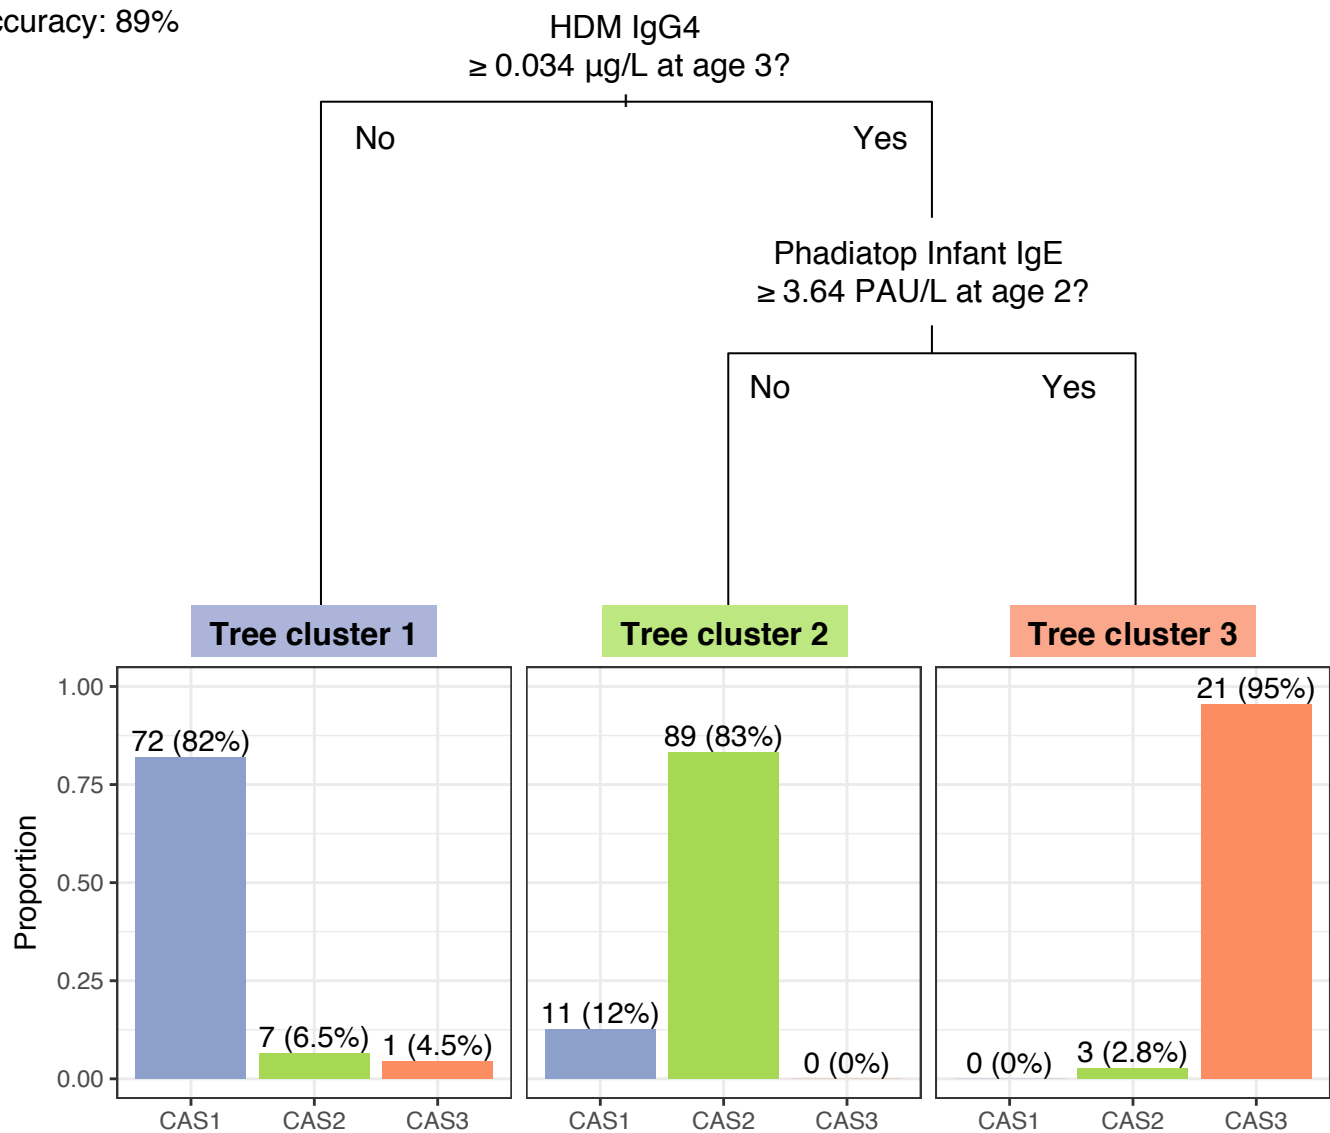

**B**

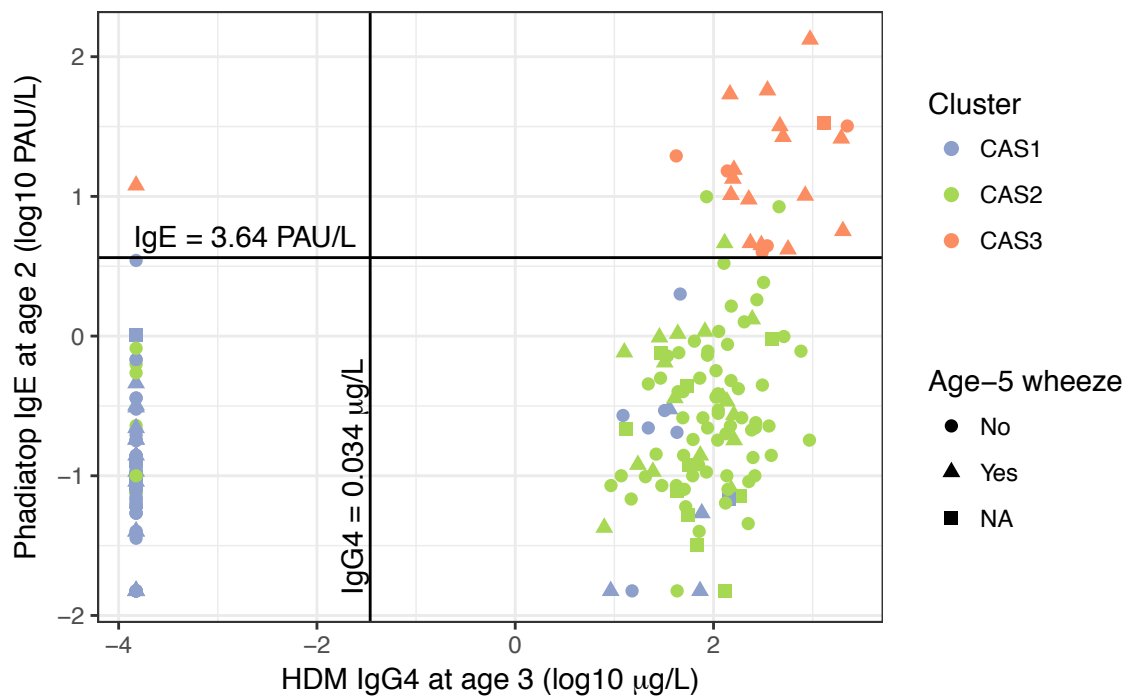

Supplement: supp [file elife-35856-supp-v1.zip › elife_poa_e35856_Figure_5_figure_supplement_1.pdf]

Accuracy: 77%

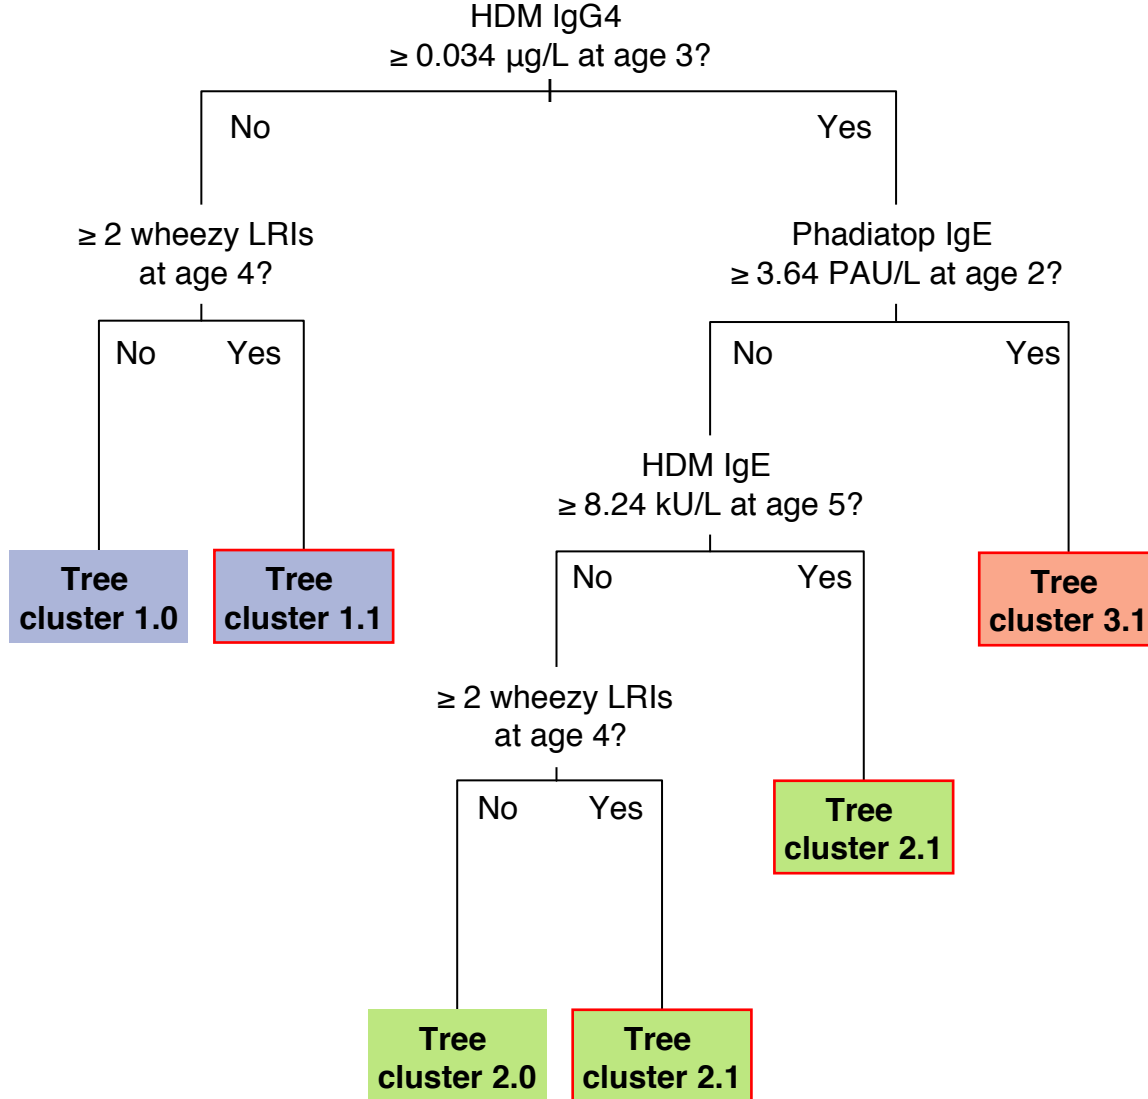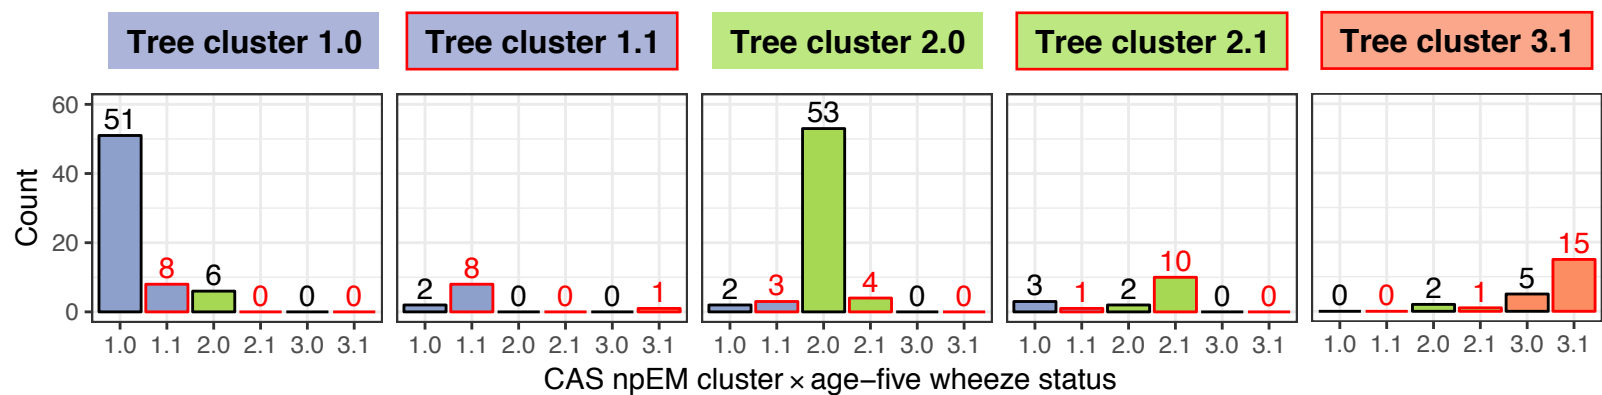

Supplement: supp [file elife-35856-supp-v1.zip › elife_poa_e35856_Figure_5_figure_supplement_3.pdf]

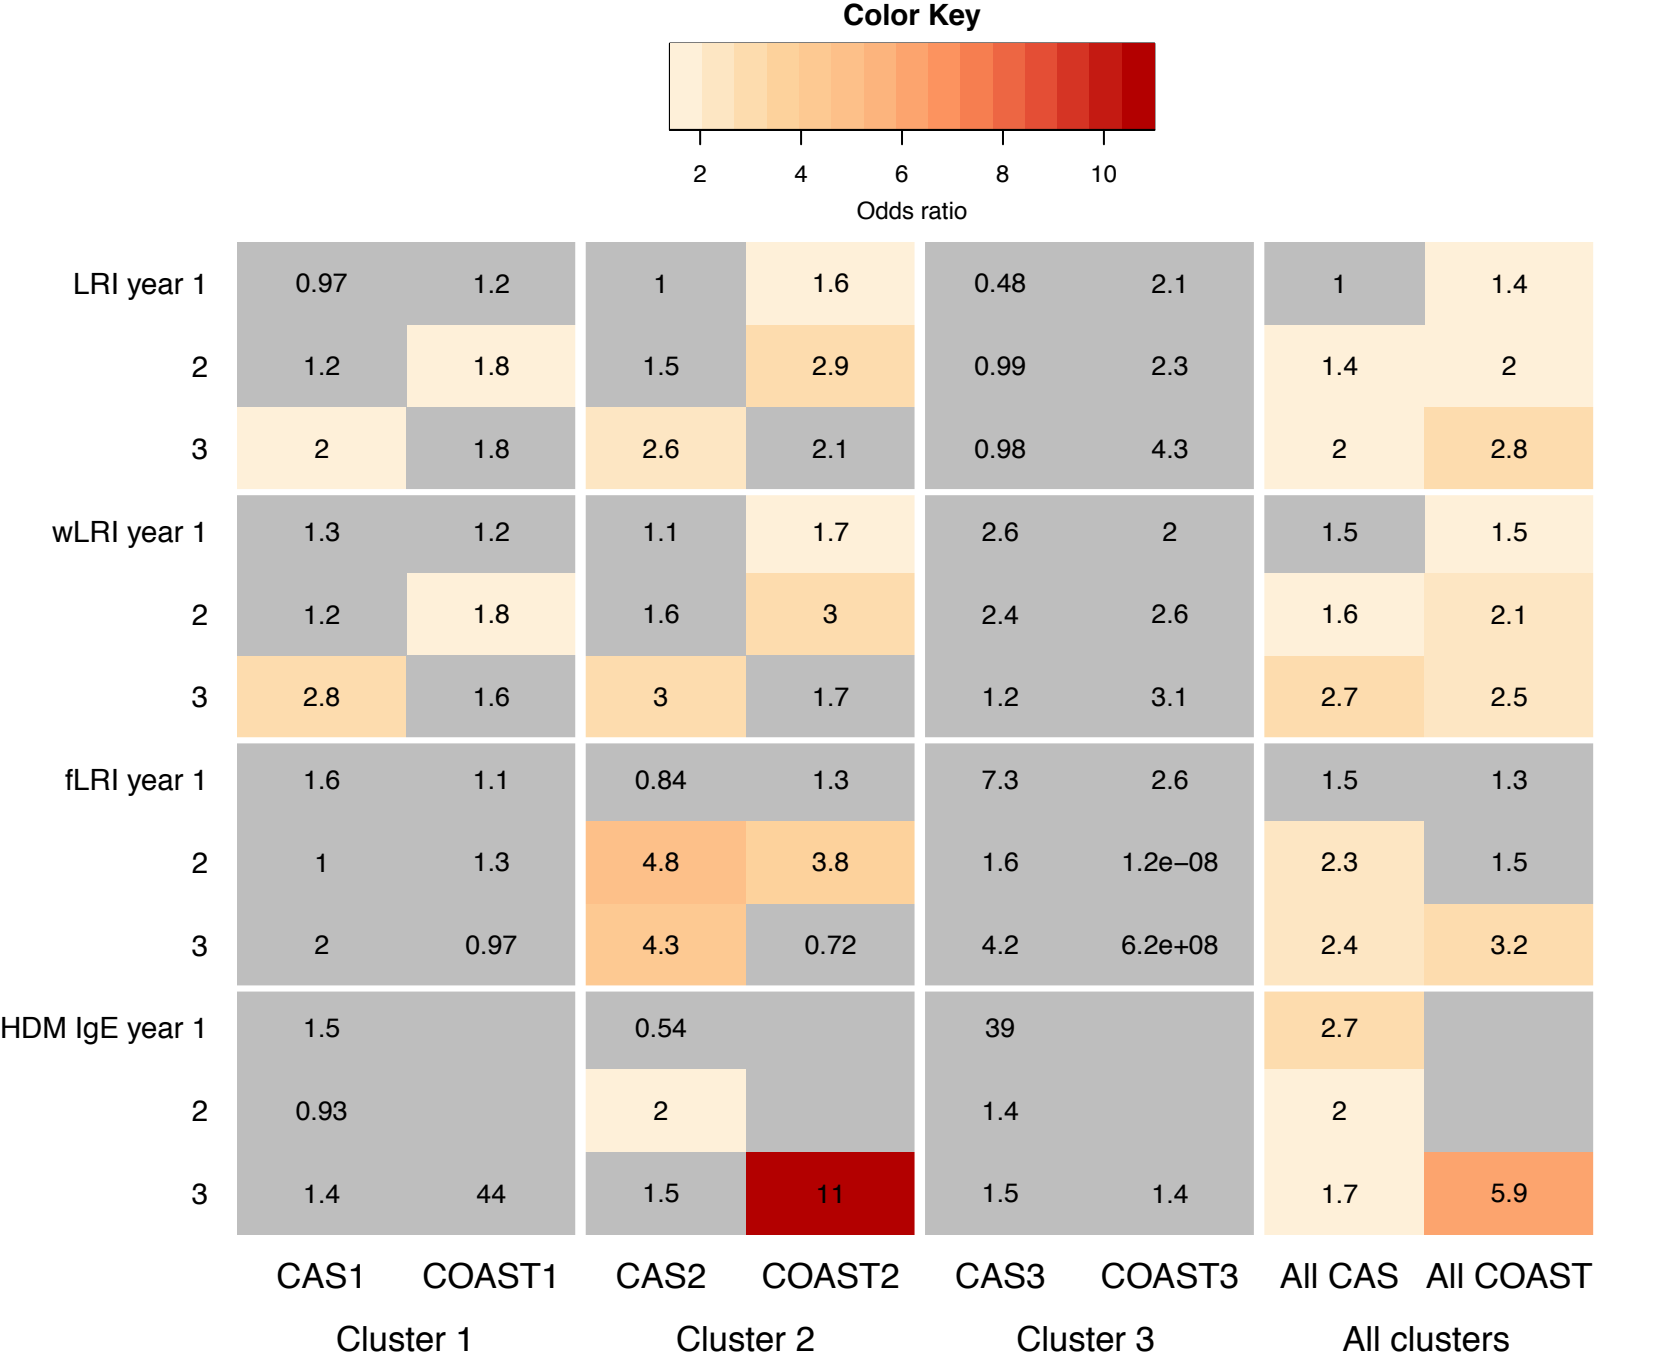

Supplement: supp [file elife-35856-supp-v1.zip › elife_poa_e35856_Figure_5_figure_supplement_4.pdf]

**A**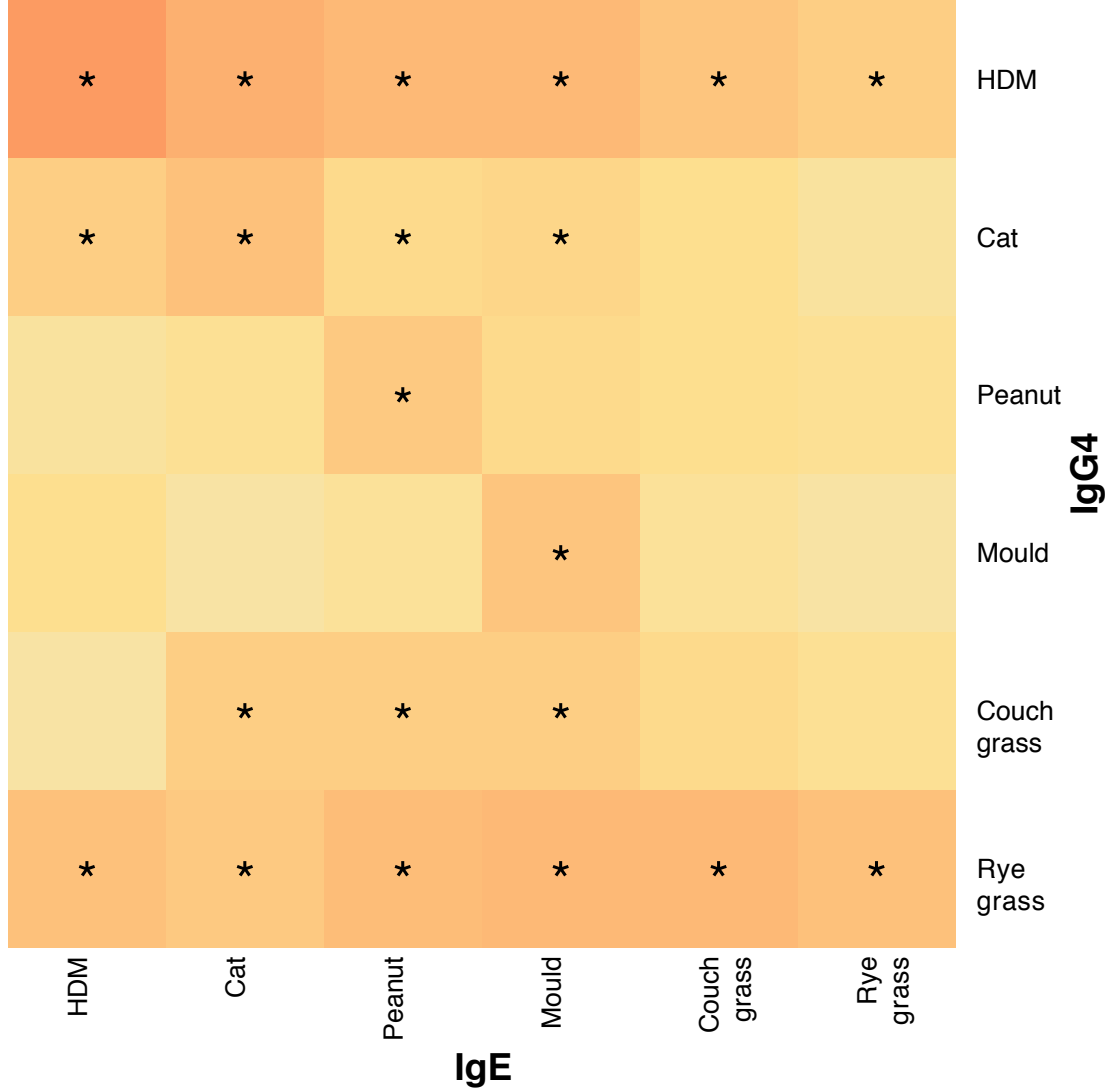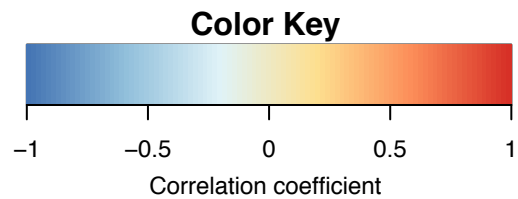**B**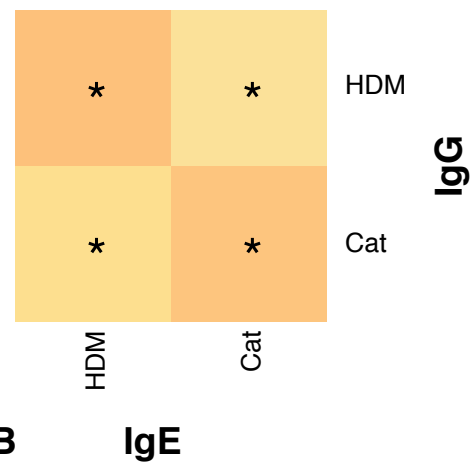

Supplement: supp [file elife-35856-supp-v1.zip › elife_poa_e35856_Figure_4_figure_supplement_1.pdf]

$n = 186$

3 clusters  $C_j$

$j : n_j \mid \text{ave}_{i \in C_j} s_i$

1 : 75 | 0.05

2 : 90 | 0.06

3 : 21 | 0.002

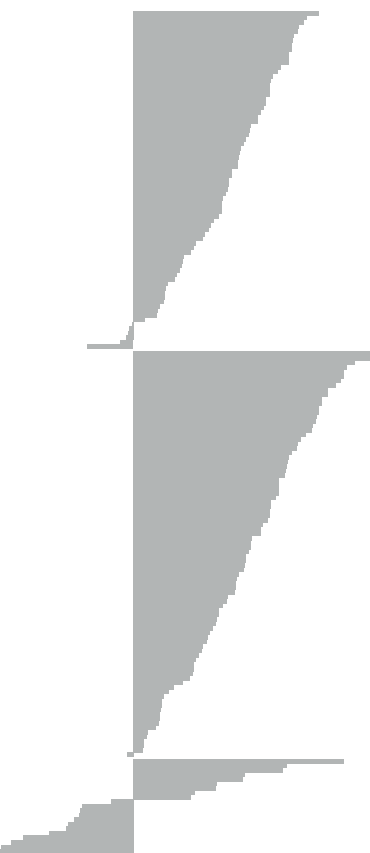

0.0

0.2

0.4

0.6

0.8

1.0

Silhouette width  $s_i$

Average silhouette width : 0.05

Supplement: supp [file elife-35856-supp-v1.zip › elife_poa_e35856_Figure_1_figure_supplement_2.pdf]

## Quality control

## Scaling

## Cluster analysis

## Post-hoc analysis

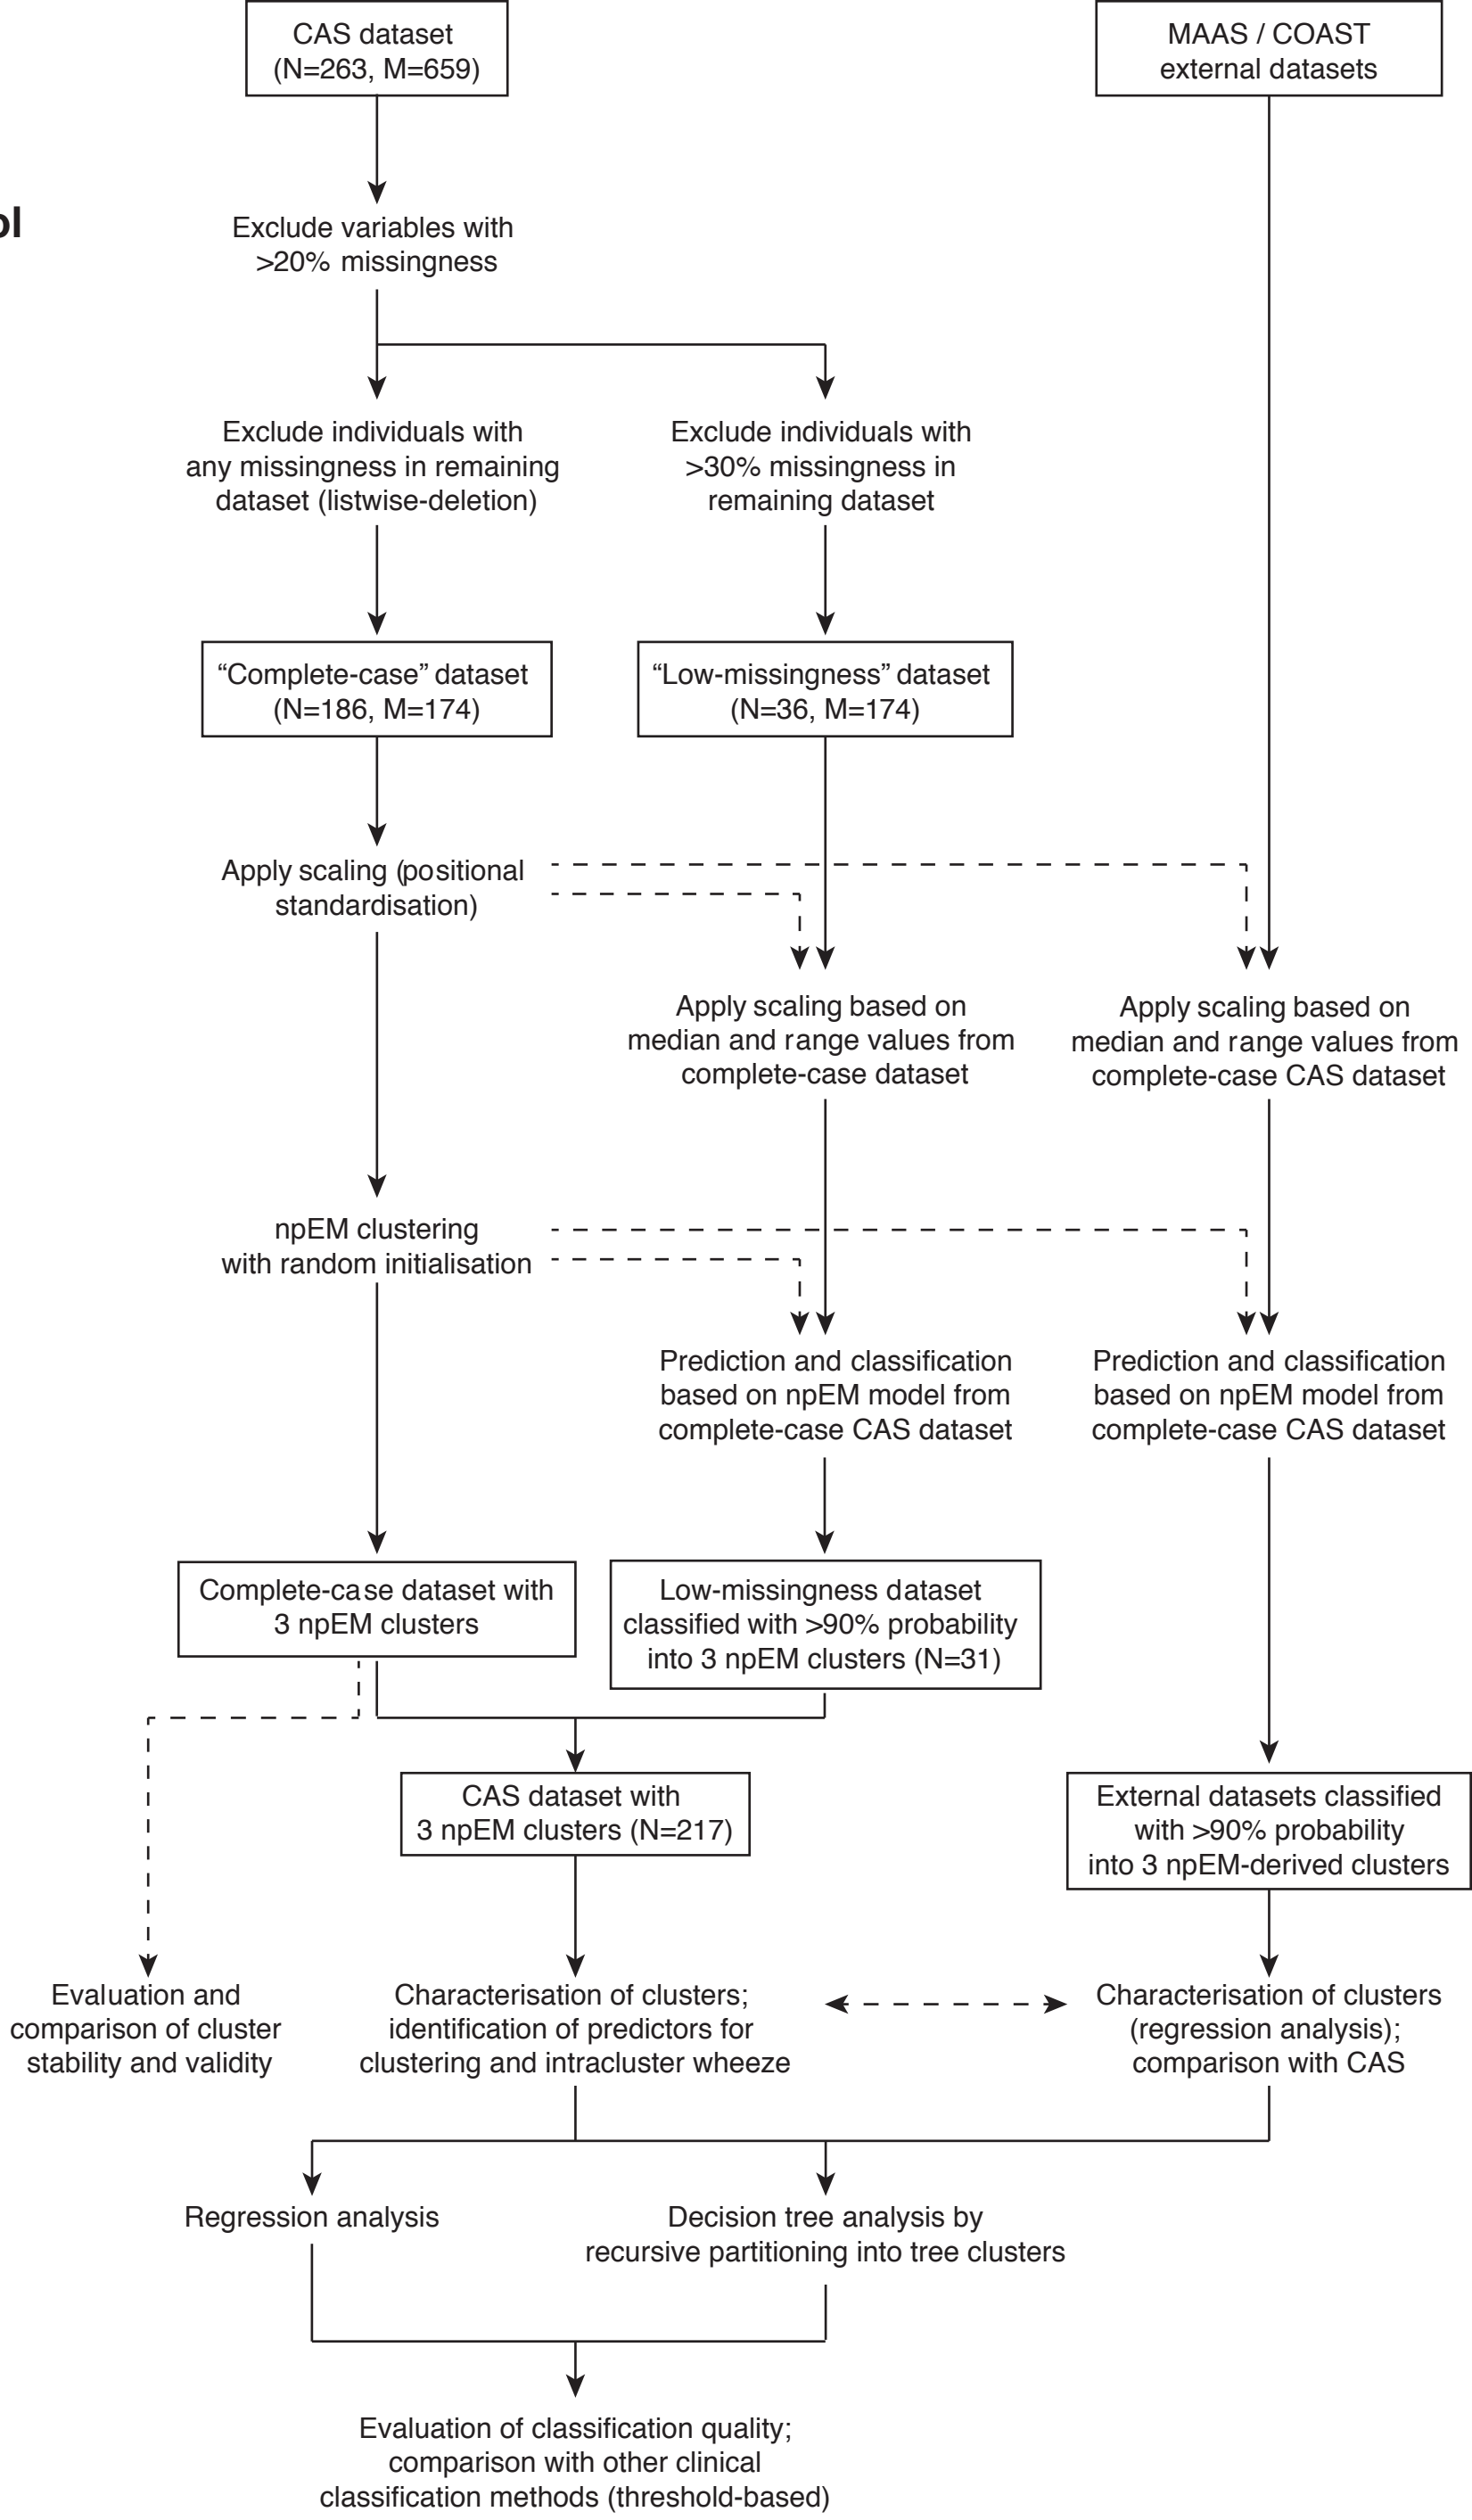

Supplement: supp [file elife-35856-supp-v1.zip › elife_poa_e35856_Figure_1_figure_supplement_3.pdf]

**A**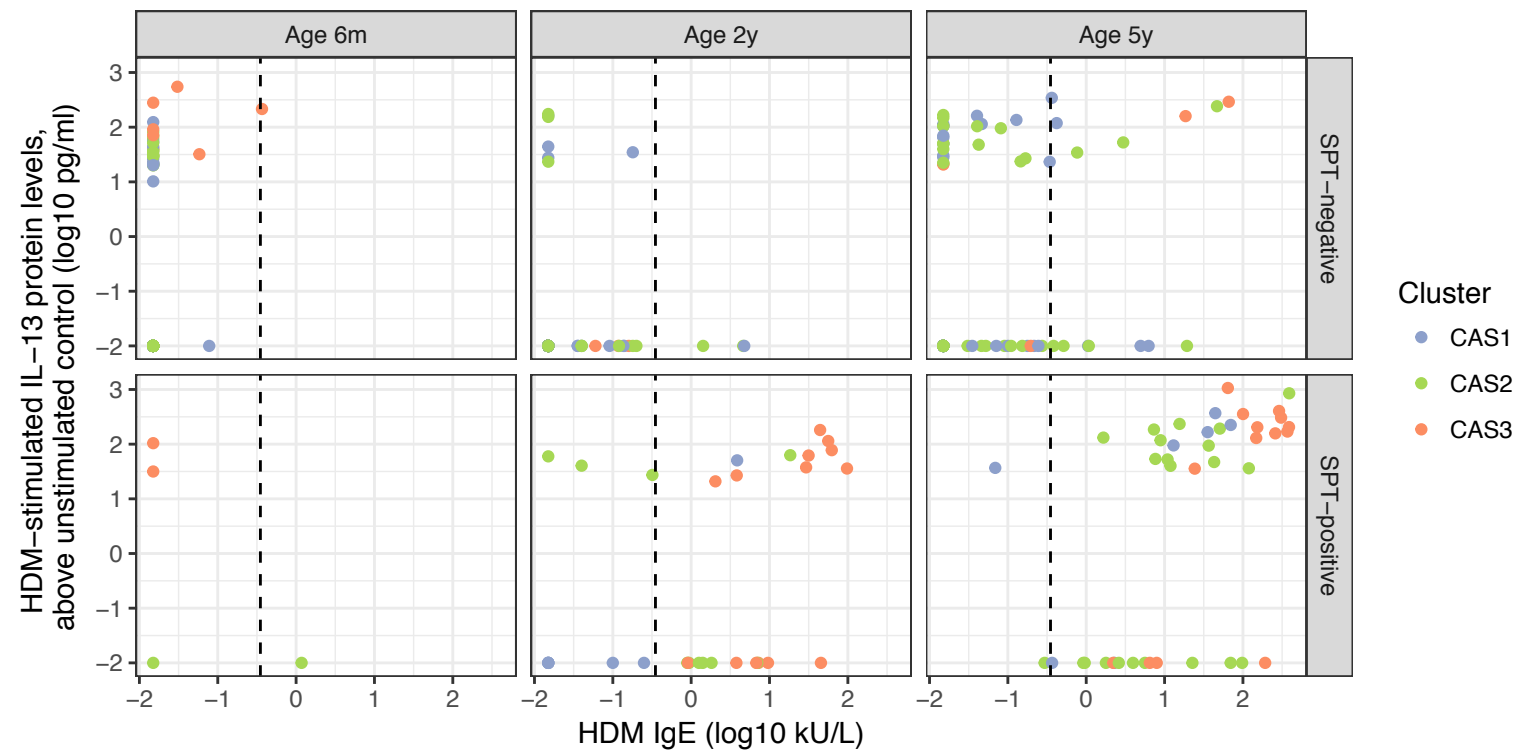**B**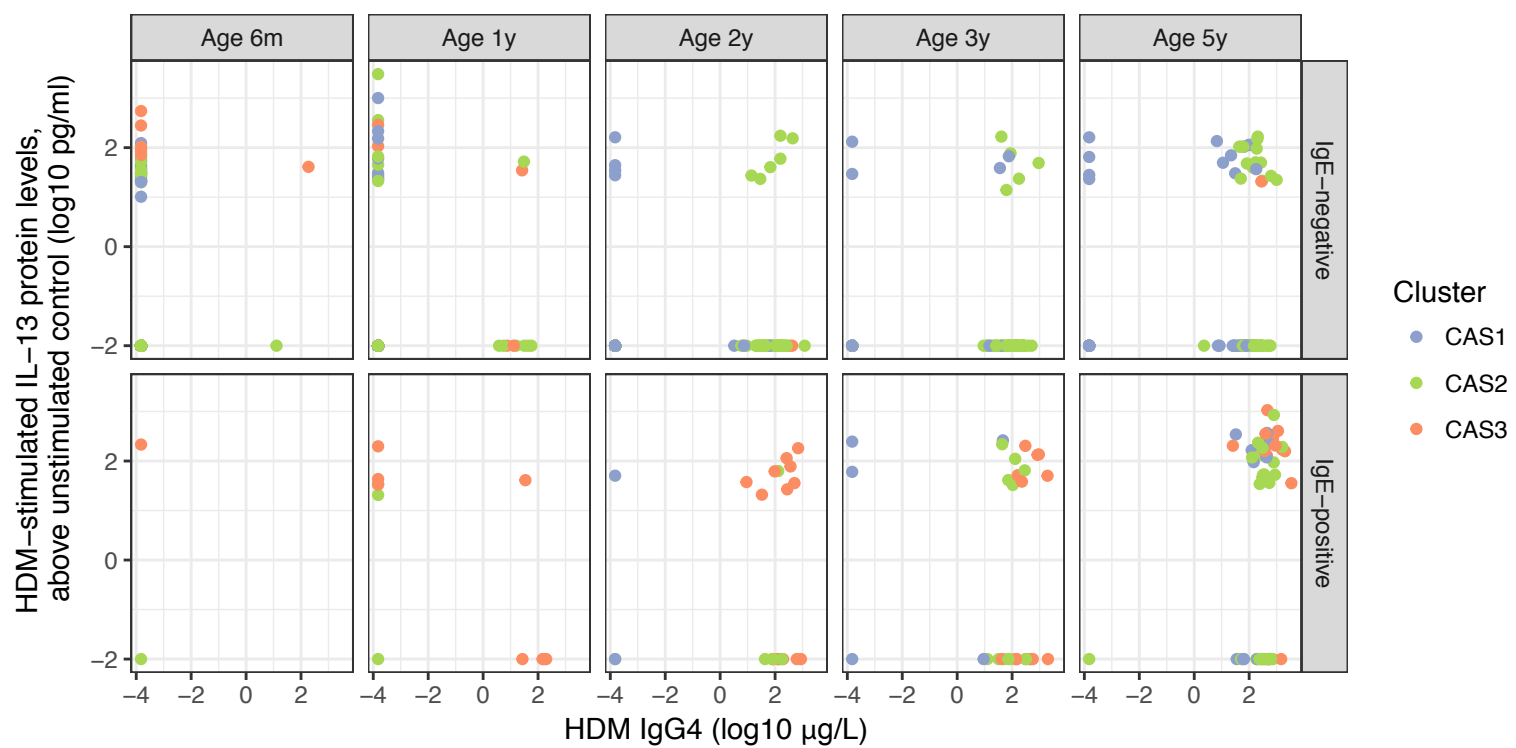

Supplement: supp [file elife-35856-supp-v1.zip › elife_poa_e35856_Figure_4_figure_supplement_2.pdf]

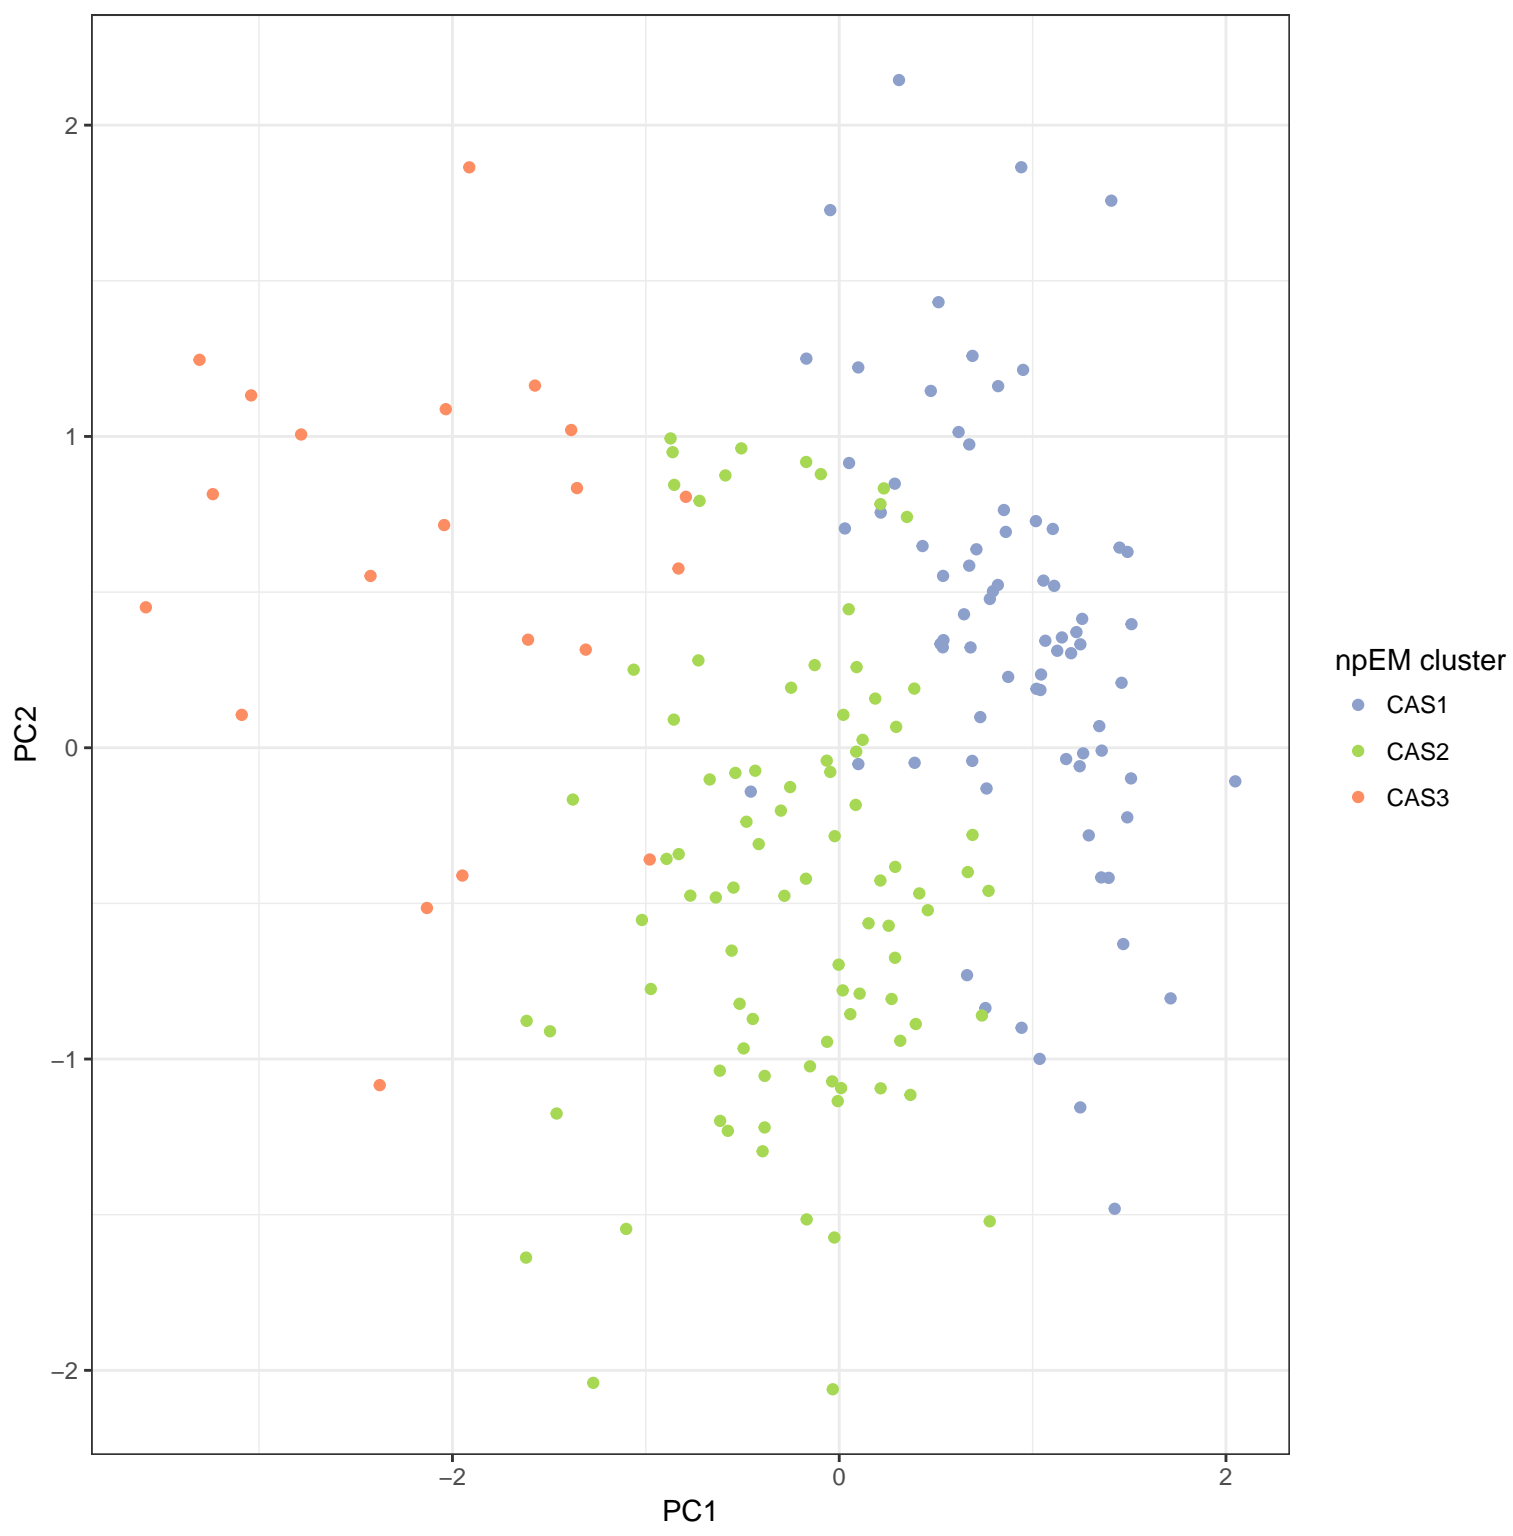

Supplement: supp [file elife-35856-supp-v1.zip › elife_poa_e35856_Figure_1_figure_supplement_1.pdf]
